# Compositional heterogeneity and outgroup choice influence the internal phylogeny of the ants

Marek L. Borowiec<sup>\*a</sup>, Christian Rabeling<sup>b</sup>, Seán G. Brady<sup>c</sup>, Brian L. Fisher<sup>d</sup>, Ted R. Schultz<sup>c</sup>, and Philip S. Ward<sup>a</sup>

<sup>a</sup>Department of Entomology and Nematology, One Shields Avenue, University of California at Davis, Davis, California, 95616, USA

<sup>b</sup>School of Life Sciences, Social Insect Research Group, Arizona State University, Tempe, Arizona, 85287, USA

<sup>c</sup>Department of Entomology, National Museum of Natural History, Smithsonian Institution, Washington, D.C., USA

<sup>d</sup>Department of Entomology, California Academy of Sciences, San Francisco, California, 94118, USA

## Abstract

Knowledge of the internal phylogeny and evolutionary history of ants (Formicidae), the world's most species-rich clade of eusocial organisms, has dramatically improved since the advent of molecular phylogenetics. A number of relationships at the subfamily level, however, remain uncertain. Key unresolved issues include placement of the root of the ant tree of life and the relationships among the so-called poneroid subfamilies. Here we assemble a new data set to attempt a resolution of these two problems and carry out divergence dating, focusing on the age of the root node of crown Formicidae. For the phylogenetic analyses we included data from 110 ant species, including the key species *Martialis heureka*. We focused taxon sampling on non-formicoid lineages of ants to gain insight about deep nodes in the ant phylogeny. For divergence dating we retained a subset of 62 extant taxa and 42 fossils in order to approximate diversified sampling in the context of the fossilized birth-death process. We sequenced 11 nuclear gene fragments for a total of ~7.5 kb and investigated the DNA sequence data for the presence of among-taxon compositional heterogeneity, a property known to mislead phylogenetic inference, and for its potential to affect the rooting of the ant phylogeny. We found sequences of the Leptanillinae and several outgroup taxa to be rich in adenine and thymine (51% average AT content) compared to the remaining ants (45% average). To investigate whether this heterogeneity could bias phylogenetic inference we performed outgroup removal experiments, analysis of compositionally homogeneous sites, and a simulation study. We

---

\*Corresponding author.

Current address: School of Life Sciences, Social Insect Research Group, Arizona State University, Tempe, Arizona, 85287, USA.

E-mail address: [petiolus@gmail.com](mailto:petiolus@gmail.com) (M. L. Borowiec).

31 found that compositional heterogeneity indeed appears to affect the placement of the root of the  
32 ant tree but has limited impact on more recent nodes. We put forward a novel hypothesis regarding  
33 the rooting of the ant phylogeny, in which *Martialis* and the Leptanillinae together constitute a  
34 clade that is sister to all other ants. After correcting for compositional heterogeneity this emerges  
35 as the best-supported hypothesis of relationships at deep nodes in the ant tree. The results of our  
36 divergence dating under the fossilized birth-death process and diversified sampling suggest that the  
37 crown Formicidae originated during the Albian or Aptian ages of the Lower Cretaceous (103–124  
38 Ma). In addition, we found support for monophyletic poneroids comprising the subfamilies Agro-  
39 comymecinae, Amblyoponinae, Apomyrminae, Paraponerinae, Ponerinae, and Proceratiinae, and  
40 well-supported relationships among these subfamilies except for the placement of Proceratiinae and  
41 (Amblyoponinae + Apomyrminae). Our phylogeny also highlights the non-monophyly of several  
42 ant genera, including *Protanilla* and *Leptanilla* in the Leptanillinae, *Proceratium* in the Procerati-  
43 inae, and *Cryptopone*, *Euponera*, and *Mesoponera* within the Ponerinae.

44 **Key words:** Systematic bias, phylogenetics, systematics, diversified sampling, fossilized birth-  
45 death process

## 46 1. Introduction

47 Ants are among the world's dominant social insects, with more species and greater ecological im-  
48 pact than any other group of eusocial animals (Hölldobler and Wilson, 1990). Knowledge of ant  
49 phylogeny is vital to understanding the processes driving the evolution of these ubiquitous and  
50 diverse organisms.

51 About 90% of extant ant diversity, or almost 11,000 species and 9 of 16 subfamilies, belongs to  
52 a group dubbed the "formicoid clade" (Brady et al., 2006). The relationships among the subfam-  
53 ilies of the formicoid clade are well-resolved. This contrasts with the uncertain branching order  
54 of lineages outside of formicoids. Two enduring issues in higher ant phylogeny, highlighted by  
55 recent studies (Moreau et al., 2006; Brady et al., 2006; Rabeling et al., 2008) and a review by Ward  
56 (2014), include the identity and composition of the lineage that is sister to all other extant ants, and  
57 whether the so-called poneroid subfamilies (Agrocomymecinae, Amblyoponinae, Apomyrminae,  
58 Paraponerinae, Ponerinae, Proceratiinae) form a clade or a grade.

59 In molecular phylogenetic studies published to date, two ant subfamilies, the Martialinae and  
60 Leptanillinae (recently redefined to include the genus *Opomyrma*; Ward and Fisher (2016)), have  
61 been competing for the designation as the sister group to all other ants (Figure 1) (Rabeling et al.,  
62 2008; Kück et al., 2011; Moreau and Bell, 2013; Ward and Fisher, 2016). Rabeling et al. (2008)  
63 discovered and described *Martialis heureka*, and inferred that this sole species of the morphologi-  
64 cally divergent Martialinae is the sister species to all other ants. Subsequent phylogenies, however,  
65 proposed that either the subfamily Leptanillinae is the lineage first branching from the rest of the  
66 ants (Kück et al., 2011), or were ambiguous about the placement of the ant root (Moreau and Bell,  
67 2013).

68 The monophyly of the poneroid subfamilies was recovered by Moreau et al. (2006) but it was  
69 later contested by Brady et al. (2006) and Rabeling et al. (2008). Brady et al. (2006) pointed out that  
70 long-branch attraction may be responsible for poneroid monophyly and found that non-monophyly  
71 of poneroids could not be rejected based on their data set of seven nuclear gene fragments. Most  
72 subsequent phylogenetic studies failed to satisfactorily resolve this issue (reviewed in Ward (2014))

73 although poneroid monophyly was recovered with strong support by [Ward and Fisher \(2016\)](#). A  
74 recently published phylogenomic study also supported poneroid monophyly ([Branstetter et al.,](#)  
75 [2017b](#)). The phylogenomic data were apparently insufficient, however, to resolve relationships  
76 among poneroid lineages because of low taxon sampling ([Branstetter et al., 2017b](#)).

77 In addition to the phylogenetic uncertainty present in the above mentioned studies, there is also  
78 potential for systematic bias to preclude correct inference of ant relationships, especially near the  
79 root of the ant tree ([Ward, 2014](#)). This is because most ants are relatively guanine and cytosine-  
80 (GC) rich compared to many aculeate outgroups and species of the Leptanillinae, which are un-  
81 usually adenine and thymine- (AT) rich. Such compositional heterogeneity is known to mislead  
82 phylogenetic inference ([Jermin et al., 2004](#)) and most of the commonly used models of sequence  
83 evolution do not take it into account. This and other potential violations may lead to poor model  
84 fit, which was demonstrated in phylogenetics in general ([Brown, 2014](#)) and in an ant phylogeny  
85 specifically ([Rabeling et al., 2008](#)). It is thus possible that the basal position of the Leptanillinae  
86 appearing in some studies is an artifact resulting from model misspecification.

87 To address these issues of uncertainty and potential bias near the base of the ant tree of life, we  
88 assembled a new comprehensive data set that included all ant subfamilies, with sampling focused on  
89 non-formicoid lineages. The amount of sequence data we gathered is significantly greater than in  
90 previous studies that included the pivotal species *Martialis heureka*. We investigated the potential  
91 of these data to be biased by base-frequency heterogeneity and implemented strategies aimed at  
92 minimizing such bias.

93 Another outstanding question concerns the age of the most-recent common ancestor of ants,  
94 which has been variously estimated to have lived as recently as ca. 115 Ma ([Brady et al., 2006](#)) or as  
95 early as 168 Ma ([Moreau et al., 2006](#)), with the oldest undisputed crown formicid fossil *Kyromyrm*  
96 *neffi* dated at 92 Ma ([Grimaldi and Agosti, 2000](#); [Barden, 2017](#)). Efforts to infer the age of origin  
97 of crown ants have been conducted thus far using either penalized likelihood ([Sanderson, 2002](#)) or  
98 node dating in a Bayesian framework ([Drummond and Rambaut, 2007](#)). Here we take advantage  
99 of the fossilized birth-death process framework ([Heath et al., 2014](#)), which was recently extended  
100 to accommodate diversified taxon sampling ([Zhang et al., 2016](#)).

101 The recently developed fossilized birth-death process (FBD) approach to divergence dating pro-  
102 vides several advantages over the node-dating approach, as it explicitly treats both extant and fossil  
103 taxa as parts of the same underlying diversification process. This is different from the node-dating  
104 approach, where fossils only provide clues about the probability-density distributions of ages for  
105 certain splits ([Heath et al., 2014](#)). FBD is thus able to avoid some of the challenges documented  
106 for node-dating, such as formulation of the statistical problem accidentally precluding reasonable  
107 age estimate for a node of interest ([Brown and Smith, 2017](#)). Early implementations of the FBD,  
108 however, shared the assumption of other Bayesian divergence-time estimation methods that taxon  
109 sampling reflects complete or random sampling of the diversification process that created the phy-  
110 logeny. Because phylogenies of higher taxa aim for maximizing phylogenetic diversity ([Höhna](#)  
111 [et al., 2011](#)), this assumption is often violated and is known to cause biased age estimates ([Beaulieu](#)  
112 [et al., 2015](#)). The most recent implementation of the FBD accounts for this by explicitly allowing  
113 modeling under a diversified sampling scheme ([Zhang et al., 2016](#)).

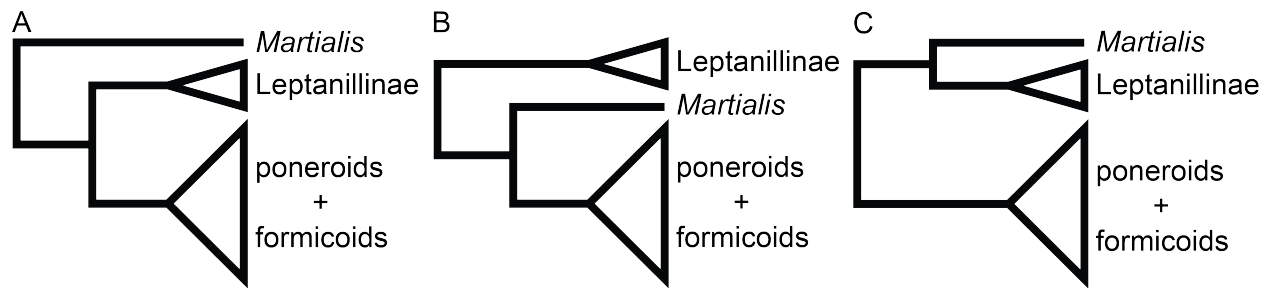

Figure 1: Comparison of alternative hypotheses for the root of the ant phylogeny. A, *Martialis* sister to all other ants (Rabeling et al., 2008); B, Leptanillinae sister to all other ants, including *Martialis* (Kück et al., 2011); C, *Martialis* plus Leptanillinae sister to all other ants (this study).

## 114 2. Methods

### 115 2.1. Taxon sampling and data collection

116 We collected data from 11 nuclear loci for 110 ant species, including *Martialis heureka*, and 13  
117 outgroup taxa. Our data set has extensive sampling within Leptanillinae (21 species), all major  
118 lineages of the poneroids (66 species), and at least one representative of all formicoid subfamilies  
119 (22 species). The sequence data comes from 28S ribosomal DNA (28S) and ten nuclear protein-  
120 coding genes: *abdominal-A (abdA)*, *elongation factor 1-alpha F2 copy (EF1aF2)*, *long wavelength*  
121 *rhodopsin (LWRh)*, *arginine kinase (argK)*, *topoisomerase I (TopI)*, *ultrabithorax (Ubx)*, *DNA pol-*  
122 *delta (POLDI)*, *NaK ATPase (NaK)*, *antennapedia (Antp)*, and *wingless (Wg)*. Sequences were  
123 assembled with Sequencher v5.2.2 (Gene Codes Corporation, Ann Arbor, MI, U.S.A.), aligned  
124 with Clustal X v2.1 (Thompson et al., 1997), and manually edited and concatenated with MacClade  
125 v4.08 (Maddison and Maddison, 2005). We excluded introns, autapomorphic indels (9 bp *abdA*, 3  
126 bp *EF1aF2*, 9 bp *Ubx*, 3 bp *POLDI*, 3 bp *NaK*, 75 bp *Antp*, 3 bp *Wg*), and hypervariable regions of  
127 28S. The resulting data matrix is 7,451 bp long and has no missing data except for gaps introduced  
128 by non-autapomorphic indels, which constitute 3% of the data. Our protocols for extraction and  
129 amplification were described in detail in Ward et al. (2010) and Ward and Fisher (2016). Of the  
130 1,353 sequences, 676 were newly generated for this study (GenBank accessions XXXXXXXX-  
131 XXXXXXXX [submission in progress]; Supplementary Table 4).

### 132 2.2. Compositional heterogeneity

133 We assessed compositional heterogeneity using methods implemented in the p4 phylogenetics li-  
134 brary (Foster, 2004). To investigate whether our data significantly departed from the assumption of  
135 homogeneity across taxa we applied two tests: 1) a  $\chi^2$  test for compositional heterogeneity, and 2)  
136 a more sensitive, simulation-based test corrected for phylogeny. The phylogeny-corrected tests in-  
137 volved inferring a neighbor-joining tree for the data, constructed with BioNJ (Gascuel, 1997), onto  
138 which we simulated 1,000 replicates using GTR+4 $\Gamma$  model. The distribution of sequence compo-  
139 sitions in the empirical data were then compared against simulated data. Following the finding that  
140 the combined data set failed both the  $\chi^2$  and phylogenetically-corrected tests, we further divided  
141 the data set into partitions as follows: 1) each locus as its own partition, and 2) first, second, and  
142 third codon position within each locus assigned to separate partitions. We then ran the two compo-

143 sitional heterogeneity tests on each partition separately and recorded the results. We also computed  
144 base frequencies for each taxon and partition using AMAS (Borowiec, 2016).

### 145 2.3. Data matrices

146 In addition to the full data set, we composed two different matrices by excluding the most AT-rich  
147 and the most GC-rich outgroups, respectively. To this end, we first ranked non-ant taxa by AT  
148 content and then removed six taxa that had either the highest or lowest AT content, which also  
149 corresponded to above or below mean AT content for the entire data set. We retained moderately  
150 AT-rich *Pristocera* MG01 as the external outgroup.

151 We also constructed a data set from which we removed all heterogeneous partitions (i.e., *28S*,  
152 all third codon positions, and first codon positions of *POLD1* and *Ubx*).

153 Selected statistics of the four analyzed data matrices are in the first four rows of Table 1.

Table 1: Data properties.

| Data matrix               | Length | Percent gaps | Variable sites | Parsimony informative sites |
|---------------------------|--------|--------------|----------------|-----------------------------|
| Full data set             | 7451   | 3.0          | 3902           | 3369                        |
| AT-rich outgroups removed | 7451   | 3.0          | 3806           | 3237                        |
| GC-rich outgroups removed | 7451   | 3.0          | 3825           | 3291                        |
| Homogeneous partitions    | 3995   | 2.7          | 1181           | 831                         |
| 28S                       | 845    | 6.8          | 425            | 317                         |
| abdA                      | 621    | 3.7          | 311            | 258                         |
| argK                      | 673    | 0.3          | 334            | 296                         |
| Antp                      | 865    | 14.0         | 497            | 397                         |
| EF1aF2                    | 517    | 0.0          | 206            | 194                         |
| LW Rh                     | 458    | 0.0          | 287            | 262                         |
| NaK                       | 955    | 0.0          | 409            | 376                         |
| POLD1                     | 583    | 0.0          | 374            | 325                         |
| Top1                      | 880    | 0.0          | 477            | 426                         |
| Ubx                       | 630    | 0.7          | 313            | 280                         |
| Wg                        | 424    | 3.4          | 269            | 238                         |
| All 1st codon pos.        | 2200   | 2.5          | 829            | 620                         |
| All 2nd codon pos.        | 2199   | 2.5          | 536            | 349                         |
| All 3rd codon pos.        | 2207   | 2.5          | 2112           | 2083                        |

### 154 2.4. Partitioning

155 In the light of recent criticism of the k-means partitioning strategy (Baca et al., 2017), for each of the  
156 four data sets we used two different strategies for partitioning: a 'greedy' algorithm on predefined  
157 user partitions and the k-means partitioning algorithm (Frandsen et al., 2015) as implemented in  
158 PartitionFinder 2 pre-release v13 (Lanfear et al., 2017). The greedy strategy relies on user-defined  
159 sets of characters as input and our predefined sets constituted sites from the three codon positions  
160 in each of the loci used, except for *28S* which was defined as a single set. We used a maximum-  
161 likelihood tree generated with the fast RAxML algorithm ("-f E" option) (Stamatakis, 2014) as

162 the starting tree for each PartitionFinder run, which then used PhyML for subsequent steps of the  
163 algorithm (Guindon et al., 2010). Because of our use of MrBayes in downstream analyses, we  
164 restricted models to be evaluated by PartitionFinder to those available in that program.

## 165 2.5. Phylogenetics

166 We constructed phylogenies for all empirical data sets using Bayesian inference with MrBayes  
167 v3.2.6 (Ronquist et al., 2012) and maximum-likelihood with IQ-TREE v1.4.2 beta (Nguyen et al.,  
168 2014). For the Bayesian analyses, we ran two separate runs, four chains each, for 20 to 80 million  
169 generations for each of the eight analyses. We used a 20% burnin fraction and determined mix-  
170 ing and convergence by examining output of MrBayes "sump" command, including average stan-  
171 dard deviation of split frequencies (below  $< 0.01$ ), effective sample size (ESS) for each parameter  
172 (minimum 200), and potential scale reduction factor (PSRF) near 1.0. In the maximum-likelihood  
173 analyses we specified the same partitioning schemes and substitution models as for the Bayesian  
174 inference. We changed the default IQ-TREE settings by using the slow nearest-neighbor inter-  
175 change search ("allnni" option) and setting the number of unsuccessful iterations to stop at 1,000  
176 instead of the default 100 ("numstop" option). We assessed support by running 2,000 ultrafast  
177 bootstrap replicates (Minh et al., 2013). The authors of this fast bootstrap approximation point out  
178 that this algorithm tends to overestimate probability of a correct relationship under 70% support  
179 but is more unbiased than RAxML's rapid bootstrapping above that threshold, resulting in 95%  
180 support being approximately equal to 95% probability of a relationship being true under the true  
181 model. Therefore, support at or above 95% should be interpreted as significant (Minh et al., 2013).  
182 We also attempted analyses under tree-heterogeneous models implemented in p4 (Foster, 2004)  
183 and nhPhyloBayes (Blanquart and Lartillot, 2008) on the full data matrix, but these turned out to  
184 be prohibitively computationally expensive, requiring by our estimate a minimum of five months  
185 to reach convergence.

## 186 2.6. Simulation

187 To further assess the sensitivity of the ant phylogeny to bias we simulated a data set with com-  
188 positional heterogeneity comparable to that present in our data set. In particular, we were inter-  
189 ested in investigating whether the position of *Martialis* could be incorrectly inferred as sister to  
190 the poneroids plus formicoids clade even if the data were simulated on a topology where *Martialis*  
191 is sister to Leptanillinae. To create the simulated data set we first split our empirical alignment,  
192 excluding ribosomal 28S, into alignments of first, second, and third codon positions. We then used  
193 a fixed topology which had *Martialis* as sister to Leptanillinae, in this case the Bayesian posterior  
194 consensus from the full data set analysis under k-means partitioning, to estimate branch lengths  
195 for each of the three alignments. To estimate the branch lengths we used IQ-TREE (Nguyen et al.,  
196 2015) under the general time-reversible model with rate heterogeneity described by a proportion  
197 of invariant sites and a gamma distribution discretized into four bins (GTR+pinv+4 $\Gamma$ ). For each  
198 of the codon position alignments we also calculated the proportion of invariant sites and base fre-  
199 quencies for all taxa using AMAS (Borowiec, 2016). Furthermore, we calculated average base  
200 frequencies for alignments composed of first and second positions. For the third codon positions  
201 alignment we calculated two average base frequencies: one for the 25 most AT-rich taxa, repre-  
202 sented almost exclusively by Leptanillinae species and some of the outgroups, and the other for

203 all remaining taxa, thus approximating mean base frequencies for AT-rich and GC-rich taxa, re-  
204 spectively. We then used the topologies with branch lengths, proportion of invariant sites, and  
205 empirical base frequencies to simulate three separate alignments, each 2,200 sites long, similar to  
206 the empirical data, under GTR+pinv+4 $\Gamma$  using p4 (Foster, 2004). For the alignments imitating first  
207 and second codon positions we simulated the data under a tree-homogeneous model, but for the  
208 third codon position alignment we used two composition vectors corresponding to the two empiri-  
209 cal means of AT-rich (A: 0.24, C: 0.24, G: 0.23, T: 0.29) and GC-rich sequences (A: 0.16, C: 0.33,  
210 G: 0.31, T: 0.20) at that position. The AT-rich frequencies were applied to the Leptanillinae and  
211 outgroup taxa considered AT-rich in our outgroup taxa removal experiments outlined above. We  
212 replicated the simulation 100 times for each alignment under different starting seed numbers. We  
213 then performed maximum-likelihood analyses under GTR+pinv+4 $\Gamma$  (using IQ-TREE settings as  
214 described above) for the concatenated simulated data as well as each of the three simulated align-  
215 ments separately. Following the inference we constructed majority-rule consensus trees using all  
216 100 maximum-likelihood trees for all codon position simulations and the concatenated alignments  
217 in order to visualize the topology recovered from simulated alignments.

## 218 2.7. Divergence time estimation

219 We performed divergence dating under the fossilized birth-death process (Heath et al., 2014) and  
220 diversified sampling, as implemented in MrBayes v3.2.6 (Ronquist et al., 2012; Zhang et al., 2016).  
221 To obtain a taxon sample that most closely approximates diversified sampling *sensu* Höhna et al.  
222 (2011), i.e., one extant descendant sampled for each branch that was present at a given time in  
223 the past, we pruned our original alignment down to 62 species. To calibrate the analysis we used  
224 42 fossil calibrations (See Supplementary Table 3) and a diffuse root node exponential prior with a  
225 mean of 250 Ma and offset at 150 Ma (just older than the oldest fossil calibration used). Because we  
226 did not include morphological data in our analysis to place the fossils ("total evidence" dating *sensu*  
227 Ronquist et al. (2012)), we assigned them to appropriate groups via monophyly constraints (Heath  
228 et al., 2014). For this analysis we also constrained the topology of outgroup taxa to correspond  
229 to the aculeate phylogeny recovered by a recent phylogenomic study (Branstetter et al., 2017a).  
230 We chose the topology from this study over that of Peters et al. (2017) because the latter did not  
231 include Rhopalosomatidae and Sierolomorphidae and thus arguably had insufficient taxon sampling  
232 to correctly place Vespidae.

233 We ran the analysis with four runs, each with six incrementally heated chains, for 100 million  
234 generations and discarded 10% of the samples as burn-in. The analysis was unpartitioned, with  
235 the GTR+6 $\Gamma$  substitution model and a relaxed independent clock model with rate drawn from a  
236 gamma distribution. We checked for convergence by examining the average standard deviation of  
237 split frequencies towards the end of the run ( $<0.006$ ), potential scale reduction factor values for  
238 each parameter (maximum 1.028, average 1.001), and effective sample sizes ( $>500$  for combined  
239 runs). We examined MCMC trace files with Tracer v1.5 to confirm that the two runs converged on  
240 all parameters and to compare posterior distributions to the analysis without data (i.e., under the  
241 prior).

242 2.8. Data availability

243 All data matrices, configurations for and output from PartitionFinder, Bayesian, and maximum-  
 244 likelihood analyses, as well as custom scripts used are available the Zenodo data repository, DOI:  
 245 [10.5281/zenodo.838799](https://doi.org/10.5281/zenodo.838799).

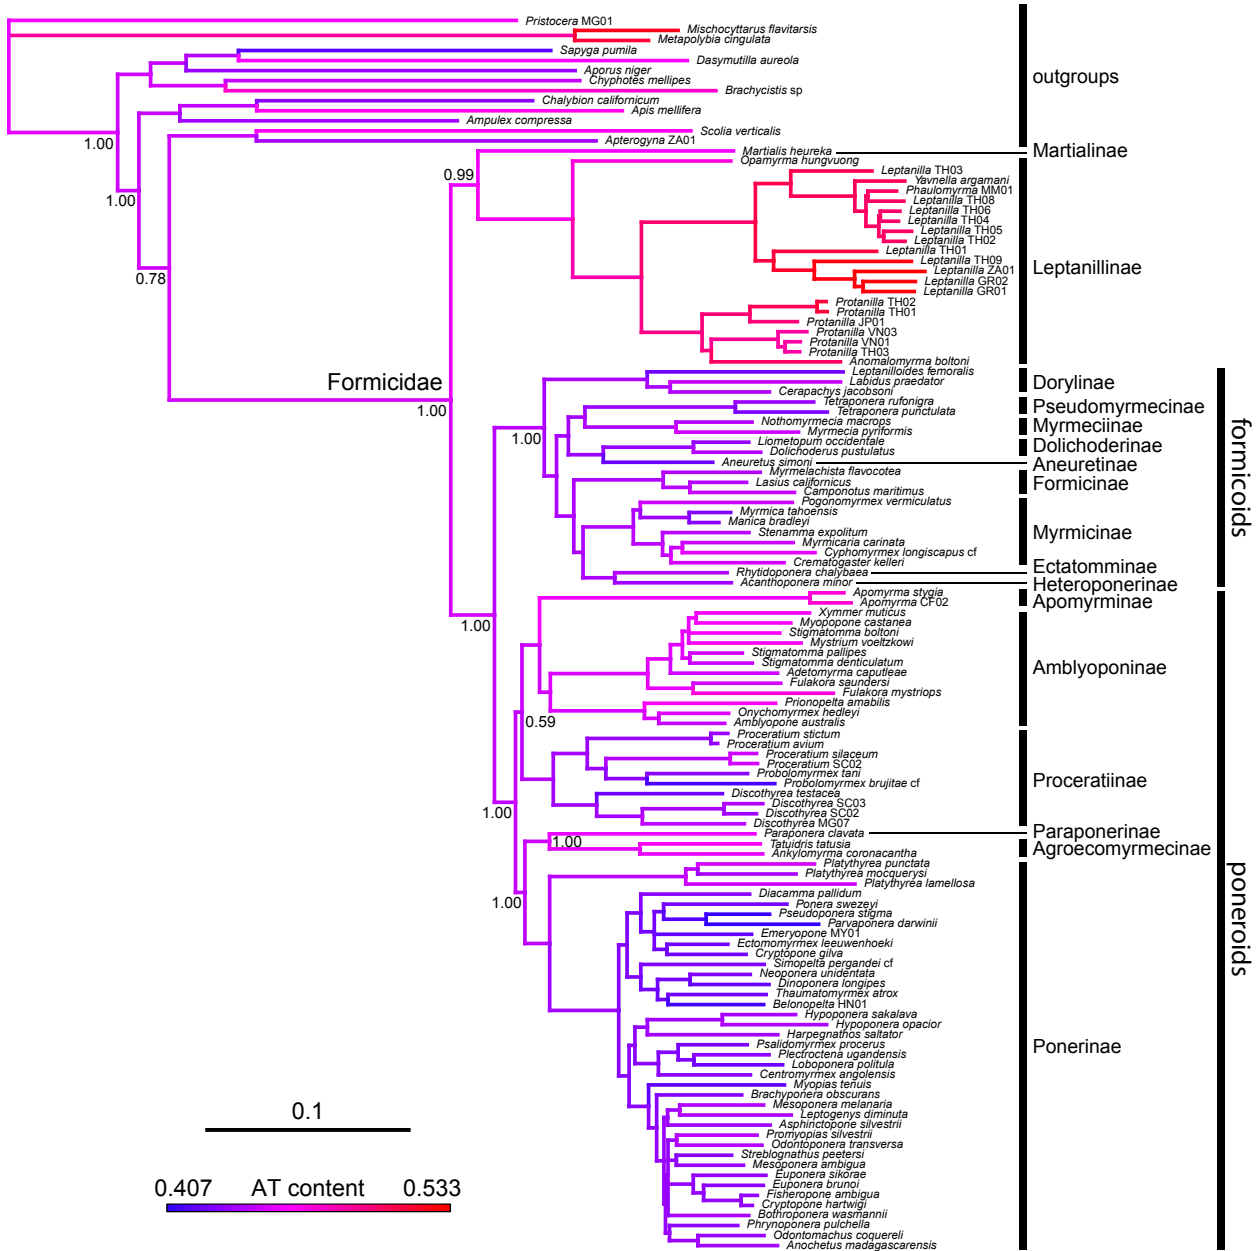

Figure 2: Preferred phylogenetic hypothesis for the ingroup (Formicidae), with AT content indicated for each terminal taxon. Tree topology with branch lengths from the Bayesian analysis of the full data matrix under k-means partitioning strategy. See Supplementary Figure 2 for support values on all nodes. Warmer branch colors signify higher AT content. Scale in expected substitutions per site.



### 246 3. Results

247 We first summarize results regarding compositional heterogeneity, followed by a discussion of the  
248 placement of the formicid root as it was impacted by the different methods. Second, we present phy-  
249 logenetic findings which were less sensitive to different analytical treatments, including poneroid  
250 monophyly, the relationships within poneroids, and non-monophyly of some of the non-formicoid  
251 genera.

#### 252 3.1. Compositional heterogeneity

253 Within the ingroup, ants in the Leptanillinae stands out as particularly AT-rich at 50.9% on average  
254 compared to a mean of 46.2% for all taxa (or 44.9% for non-leptanilline ants). At 46.6%, *Martialis*  
255 is close to the mean (Figure 2, Supplementary Table 1).

256 We found considerable compositional heterogeneity among taxa in our data set, mostly confined  
257 to third codon positions. Overall difference in AT content among taxa was 12.6% across the entire  
258 data set. This difference was equal to 37.3% at third codon positions, compared to only 3.5% at  
259 first codon positions and 1.1% at the second codon positions. Third codon positions also accounted  
260 for 56.7% variable sites and 61.8% parsimony informative sites of the data set.

261 Consistent with this pattern, the phylogeny-corrected test identified all third codon partitions  
262 as those for which the homogeneity assumption could be rejected with a  $p < 0.05$  (Supplementary  
263 Table 2). In addition to the third codon positions, *28S*, and first codon positions of *POLD1* and  
264 *Ubx* were found to violate the homogeneity assumption using this test. Similar to the phylogeny-  
265 corrected test, the  $\chi^2$  test identified all of the third codon positions as heterogeneous but it did not  
266 reject the homogeneity assumption for *28S* and first codon positions of *POLD1* and *Ubx* (Supple-  
267 mentary Table 2).

268 Compositional heterogeneity was also high among the outgroups. Those that fell above the  
269 mean AT content for the entire alignment included (in order of decreasing AT content) *Mischocy-*  
270 *tarus flavitarsis*, *Metapolybia cingulata*, *Brachycistis* sp., *Apis mellifera*, *Dasymutilla aureola*, *Sco-*  
271 *lia verticalis*, and *Pristocera* MG01. The outgroup species that were more GC-rich than average  
272 were (in order of decreasing AT content) *Chyphotes mellipes*, *Ampulex compressa*, *Apterogyna*  
273 *ZA01*, *Aporus niger*, *Chalybion californicum*, and *Sapyga pumila* (Supplementary Table 1).

#### 274 3.2. Analyses of the full data matrix

275 With all taxa retained and no attempt at reducing the compositional heterogeneity of the data, the  
276 partitioning strategy has a strong effect on the results. Under the k-means strategy *Martialis heureka*  
277 is sister to the Leptanillinae with strong support of  $pp = 0.99$  in the Bayesian analysis (Figure  
278 2; Supplementary Figure 2) and low support of 87% bootstrap in the maximum-likelihood tree  
279 (Supplementary Figure 4). Under the greedy analyses, both Bayesian and maximum-likelihood  
280 trees recover a topology where the Leptanillinae are sister to the remaining Formicidae including  
281 *Martialis*, although support for this topology is below significance ( $pp = 0.81$  and bootstrap 93%;  
282 Supplementary Figures 1 and 3).

### 283 3.3. Effects of outgroup removal

284 Relative to the full data matrix with all 13 outgroup species, removal of the AT-rich outgroups  
285 (*Apis mellifera*, *Brachycistis* sp., *Dasymutilla aureola*, *Scolia verticalis*, *Metapolybia cingulata*,  
286 and *Mischocyttarus flavitarsis*) shifts support towards a tree where *Martialis* and the Leptanillinae  
287 together form a clade that is sister to all other ants. In consensus Bayesian trees, the support for  
288 this clade is at  $pp = 0.91$  under greedy (Supplementary Figure 5) and  $pp = 1.0$  under the k-means  
289 partitioning strategy (Supplementary Figure 6). Under maximum-likelihood, the effect is less ob-  
290 vious, as the ML tree under greedy partitioning has *Martialis* sister to formicoids and poneroids  
291 but now with only 50% bootstrap support (Supplementary Figure 7). In the k-means maximum-  
292 likelihood tree, *Martialis* and Leptanillinae form a clade supported in 99% bootstrap replicates  
293 (Supplementary Figure 8).

294 Removal of GC-rich outgroups (*Ampulex compressa*, *Aporus niger*, *Apterogyna* ZA01, *Chaly-  
295 bion californicum*, and *Chyphotes mellipes*) reinforces support for the topology where Leptanillinae  
296 are sister to *Martialis* plus formicoids plus poneroids with  $pp = 1.0$  under greedy partitioning (Sup-  
297 plementary Figure 9) and  $pp = 0.98$  under k-means in Bayesian analyses (Supplementary Figure  
298 10). The same pattern is present in maximum-likelihood trees, which both show Leptanillinae sis-  
299 ter to *Martialis* plus formicoids and poneroids. Under greedy analyses bootstrap support for this  
300 clade is 99% (Supplementary Figure 11) and under k-means it is 96% (Supplementary Figure 12).

### 301 3.4. Compositionally homogeneous matrix

302 The analyses of homogeneous data partitions result in a tree where *Martialis* is sister to the Lep-  
303 tanillinae with strong support regardless of partitioning scheme and inference method (Table 2).  
304 Bayesian trees under both greedy and k-means partitioning strategies show  $pp = 1.00$  (Supple-  
305 mentary Figures 13 and 14). Under maximum-likelihood this node is supported in 100% bootstrap  
306 replicates under both greedy k-means partitioning strategies (Supplementary Figures 15 and 16).

### 307 3.5. Simulation

308 In the maximum-likelihood analyses of simulated alignments imitating first codon positions the  
309 *Martialis* plus Leptanillinae clade, i.e., the topology under which the data were simulated, is recov-  
310 ered consistently (Supplementary Figure 17). For the alignments imitating second codon positions  
311 *Martialis* emerges as sister to the Leptanillinae in 96 out of 100 trees Supplementary Figure 18),  
312 and in the tree derived from the matrix imitating third codon positions *Martialis* is sister to the  
313 Leptanillinae in only 64 trees out of 100 (Supplementary Figure 19). The remaining 36 trees show  
314 *Martialis* either as sister to the poneroid plus formicoid clade, with Leptanillinae being sister to  
315 all other ants, or, alternatively as the sister group to all ants. The combined data set supports the  
316 *Martialis* plus Leptanillinae clade in 99 out of 100 trees (Supplementary Figure 20).

### 317 3.6. Relationships among poneroid subfamillies

318 The so-called poneroid ant subfamillies that include Agroecomyrmecinae, Amblyoponinae, Apomyr-  
319 minae, Paraponerinae, Ponerinae, and Proceratiinae form a well supported clade. This result ap-  
320 pears more robust to different analytics than the placement of the root of the tree. Support for this  
321 clade is often maximum in Bayesian analyses and generally above 90% bootstrap proportion in the

322 maximum-likelihood analyses, except for the data set with GC-rich outgroups removed, where the  
323 support is only 75% (Table 2).

324 Within the poneroid clade, another set of relationships that is well-supported across the anal-  
325 yses is the sister relationship of Agroecomyrmecinae and Paraponerinae, which is significantly  
326 supported in all analyses except in the maximum-likelihood trees inferred from the homogeneous  
327 data matrix. This clade is in turn sister to the Ponerinae in all analyses, although support varies.  
328 This relationship receives maximum support in all Bayesian analyses except for the data matrix  
329 with GC-rich outgroups removed. In maximum-likelihood trees support varies between 74% and  
330 97% bootstrap replicates (Table 2).

331 The most problematic is placement of Proceratiinae and (Amblyoponinae + Apomyrminae),  
332 which in some analyses form a clade, and in others form a grade where Amblyoponinae plus  
333 Apomyrminae are the sister clade to all other poneroids and Proceratiinae is sister to the remaining  
334 subfamilies. The support for both of these alternatives is never significant, however (Table 2).

### 335 3.7. *Non-monophyly of currently recognized genera*

336 Several shallow nodes, well-supported regardless of the data set and analysis method, highlight  
337 non-monophyly of genera outside of the formicoid clade (Figure 2; Supplementary Figures 1–16).

338 In the Leptanillinae, the morphologically derived genus *Anomalomyrma* is nested within *Protanilla*,  
339 and two genera known only from males, *Phaulomyrma* and *Yavnella*, are nested within *Leptanilla*.

340 Within the small subfamily Proceratiinae, the four species of *Proceratium* included in our data  
341 matrices were paraphyletic with respect to *Probolomyrmex*.

342 Under all analyses we recover three non-monophyletic genera within Ponerinae: *Cryptopone*  
343 *gilva* and *Cryptopone hartwigi* included here are only very distantly related, the genus *Euponera*  
344 is paraphyletic with respect to the *Cryptopone hartwigi* plus *Fisheropone* clade, and *Mesoponera*  
345 is polyphyletic, here represented by *M. melanaria*, which is sister to *Leptogenys*, and *M. ambigua*,  
346 here sister to *Streblognathus peetersi*.

### 347 3.8. *Divergence time analyses*

348 Our divergence time analysis recovers a relatively young age for the most common ancestor of  
349 crown-group ants, estimated to have lived during the Albian or Aptian ages of the Lower Cretaceous  
350 (Figure 3, Table 3; median age 112 Ma, 95% highest posterior density interval 103–123 Ma). The  
351 crown formicoids are estimated to have arisen ~101 Ma, closely followed by the split of *Martialis*  
352 from the Leptanillinae around 99 Ma, and the origin of poneroids at 92 Ma. The median ages  
353 inferred for the subfamilies where our taxon sampling spanned the root node are as follows: 45 for  
354 Agroecomyrmecinae, 75 Ma for Amblyoponinae plus Apomyrminae, 55 Ma for Dolichoderinae,  
355 60 Ma for Formicinae, 66 Ma for Leptanillinae, 45 Ma for Myrmeciinae, 61 Ma for Myrmicinae,  
356 73 Ma for Ponerinae, and 65 Ma for Proceratiinae.

## 357 4. Discussion

### 358 4.1. *Compositional heterogeneity and the rooting of the ant tree*

359 Earlier studies recognized the difficulty in rooting the ant tree of life (Brady et al., 2006; Rabeling  
360 et al., 2008) and our analyses confirm the supposition (Ward, 2014) that the effects of composi-

Table 2: Support for selected relationships in Bayesian consensus and maximum-likelihood (ML) trees. Support for Bayesian analyses is expressed in posterior probabilities rounded to two decimal places and for ML in percentage of bootstrap replicates. Ag: Agroecomyrmecinae, Am: Amblyoponinae plus Apomyrminae, for: formicoids, Le: Leptanillinae, Ma: Martialinae, Pa: Paraponerinae, Po: Ponerinae, pon: poneroids, Pr: Proceratinae. NA signifies a case where the relationship was not recovered in the consensus or maximum-likelihood tree.

| Matrix                | Method | Partitioning | Ma + Le | Ma + (for<br>+ pon) | pon<br>monophyl. | Ag + Pa | Po + (Ag<br>+ Pa) | Pr + Am | Pr +<br>(Ag/Pa/Po) | Am +<br>(Ag/Pa/Po) |
|-----------------------|--------|--------------|---------|---------------------|------------------|---------|-------------------|---------|--------------------|--------------------|
| Full                  | ML     | greedy       | NA      | 93                  | 100              | 100     | 97                | NA      | 77                 | NA                 |
| Full                  | ML     | k-means      | 87      | NA                  | 92               | 98      | 88                | 71      | NA                 | NA                 |
| Full                  | Bayes  | greedy       | NA      | 0.81                | 1.00             | 1.00    | 1.00              | NA      | 0.54               | NA                 |
| Full                  | Bayes  | k-means      | 0.99    | NA                  | 1.00             | 1.00    | 1.00              | 0.59    | NA                 | NA                 |
| AT-rich outr. removed | ML     | greedy       | NA      | 50                  | 99               | 100     | 92                | NA      | 70                 | NA                 |
| AT-rich outr. removed | ML     | k-means      | 99      | NA                  | 97               | 99      | 83                | 64      | NA                 | NA                 |
| AT-rich outr. removed | Bayes  | greedy       | 0.91    | NA                  | 1.00             | 1.00    | 1.00              | 0.5     | NA                 | NA                 |
| AT-rich outr. removed | Bayes  | k-means      | 1.00    | NA                  | 1.00             | 1.00    | 1.00              | 0.64    | NA                 | NA                 |
| GC-rich outr. removed | ML     | greedy       | NA      | 99                  | 99               | 100     | 95                | NA      | 86                 | NA                 |
| GC-rich outr. removed | ML     | k-means      | NA      | 96                  | 75               | 96      | 73                | NA      | 45                 | NA                 |
| GC-rich outr. removed | Bayes  | greedy       | NA      | 1.00                | 1.00             | 1.00    | 1.00              | NA      | 0.87               | NA                 |
| GC-rich outr. removed | Bayes  | k-means      | NA      | 0.98                | 0.88             | 0.99    | 0.88              | NA      | 0.54               | NA                 |
| Homogeneous           | ML     | greedy       | 100     | NA                  | 98               | 81      | 99                | NA      | NA                 | 79                 |
| Homogeneous           | ML     | k-means      | 100     | NA                  | 98               | 78      | 100               | NA      | NA                 | 72                 |
| Homogeneous           | Bayes  | greedy       | 1.00    | NA                  | 1.00             | 0.99    | 1.00              | NA      | NA                 | 0.67               |
| Homogeneous           | Bayes  | k-means      | 1.00    | NA                  | 1.00             | 0.93    | 1.00              | 0.50    | 0.50               | NA                 |

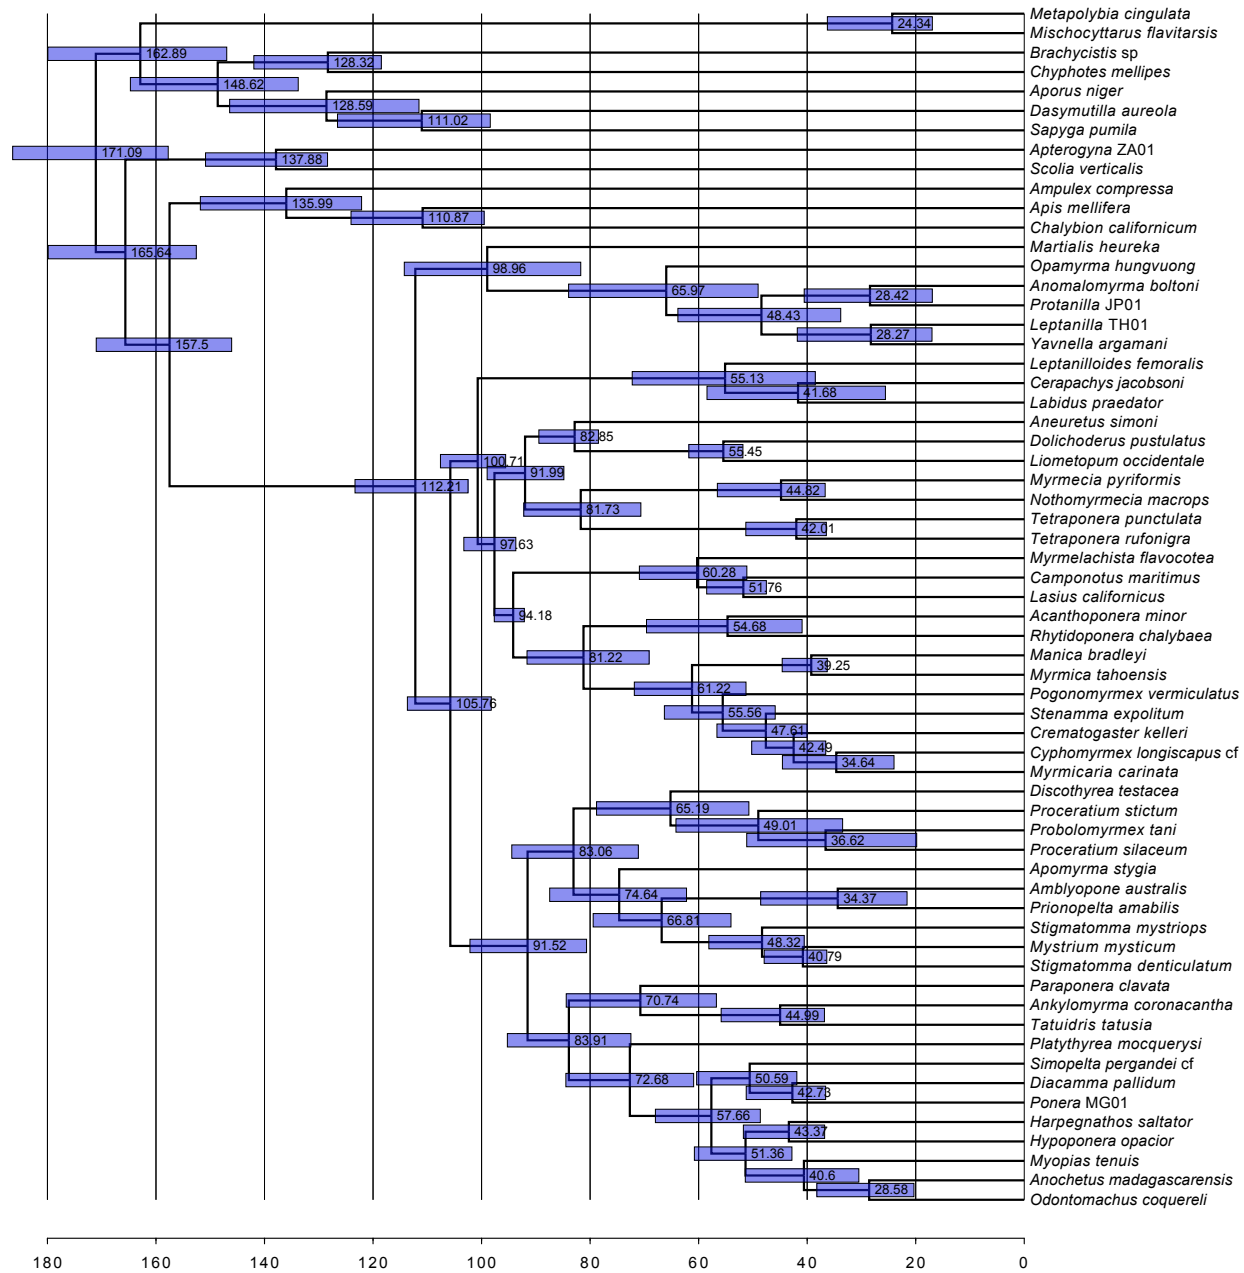

Figure 3: Chronogram from the divergence dating analysis under the fossilized birth-death process with diversified sampling, in MrBayes. Scale is in Ma. Bars depict the 95% highest posterior probability density of each estimate.

361 tional heterogeneity play a role. The outgroup removal experiments, exclusion of compositionally  
 362 heterogeneous sites, and simulations all suggest that with greater compositional heterogeneity in  
 363 the data the abnormally AT-rich Leptanillinae species are drawn more strongly to the base of the ant  
 364 tree. As a result of this, the more GC-rich *Martialis* can erroneously cluster with the clade of formi-  
 365 coids and poneroids, as in Kück et al. (2011). When compositional heterogeneity is accounted for,  
 366 as in the homogeneous data matrix, the Leptanillinae and *Martialis* emerge as sister taxa forming  
 367 a strongly supported clade that is sister to all other ants.

Table 3: Comparison of divergence time estimates. Numbers for this study refer to median node age (95% highest posterior density) in Ma. Numbers from other studies are ranges of means/medians from across all analyses presented.

| Crown taxon                            | This study    | Brady et al. 2006 | Moreau et al. 2006 | Moreau and Bell 2013 | Schmidt 2013 |
|----------------------------------------|---------------|-------------------|--------------------|----------------------|--------------|
| Formicidae                             | 112 (103–123) | 111–137           | 141–169            | 139–158              | 116–141      |
| Leptanillinae (excl. <i>Opamyрма</i> ) | 48 (34–64)    | 68–89             | 102–123            | 72–104               | NA           |
| Amblyoponinae + Apomyrminae            | 75 (62–87)    | 92–118            | 113–143            | NA                   | 85–100       |
| Proceratiinae                          | 65 (51–79)    | 78–98             | 111–132            | NA                   | 74–88        |
| Ponerinae                              | 73 (61–84)    | 79–103            | 111–132            | 56–60                | 85–102       |
| Dolichoderinae                         | 55 (52–62)    | 71–76             | 86–97              | 53–66                | NA           |
| Myrmeciinae                            | 45 (37–57)    | 46–52             | NA                 | NA                   | NA           |
| Formicinae                             | 60 (51–71)    | 77–82             | 92–104             | 75–90                | 65–70        |
| Myrmicinae                             | 61 (51–72)    | 82–89             | 100–114            | 78–90                | 73–76        |
| Dorylinae                              | >= 55 (39–72) | 76–87             | 99–117             | 78–95                | 78–88        |

368 The selective outgroup removal experiment shows a trend in which support for the AT-rich Lep-  
 369 tanillinae as sister to all other ants including *Martialis* is the strongest when only AT-rich outgroups  
 370 are retained, moderate or weak when all outgroups (those that are AT- and GC-rich) are retained,  
 371 and the weakest when all the AT-rich outgroups are removed. This suggests that the AT content of  
 372 outgroup taxa indeed causes attraction of the above-average AT-rich Leptanillinae to the base of the  
 373 ant tree. This finding has interesting implications for outgroup choice in phylogenetics in general,  
 374 as it suggests that choice of outgroups should be made not only on the basis of their close rela-  
 375 tionship to the ingroup taxa, but also taking into account sequence divergence and other properties  
 376 relative to the ingroup (Takezaki and Nishihara, 2016)

377 Finally, our simulations show that compositional heterogeneity similar to that in our empiri-  
 378 cal data matrix has the potential to cause bias resulting in the incorrect placement of Leptanillinae  
 379 as sister to *Martialis* plus poneroids plus formicoids. The matrix designed to imitate third codon  
 380 positions was simulated on a tree where *Martialis* was sister to Leptanillinae, but the maximum-  
 381 likelihood trees inferred from this alignment often recover *Martialis* sister to all other ants or sister  
 382 to the poneroids plus formicoids, both topologies recovered in previous studies (Rabeling et al.,  
 383 2008; Kück et al., 2011). The tree topology used for the simulation is correctly recovered from the  
 384 alignments imitating first and second codon positions in most cases. These alignments were sim-  
 385 ulated with base frequencies drawn from our empirical alignment and under a tree-homogeneous  
 386 model. On a combined simulated data set the negative effect of sites emulating third codon posi-  
 387 tions is overwhelmed by the homogeneous data and the inferred tree is consistent with the topology  
 388 on which the data were simulated in 99 out of 100 maximum-likelihood trees obtained from the  
 389 simulated concatenated data. These effects appear not to be as strong as seen in our empirical  
 390 data, but the simulation is a simplistic scenario that is likely to involve fewer confounding factors.  
 391 In particular, 1) the same substitution model that generated the data could be used for inference  
 392 (minus compositional heterogeneity), 2) the simulations attempted to capture only one dimension  
 393 of the process heterogeneity, and 3) in our empirical data matrix compositionally heterogeneous  
 394 sites were actually over-represented compared to the simulated matrix because of the heteroge-  
 395 neous 28S partition, which was not taken into account when simulating the matrix imitating the  
 396 non-homogenous third codon positions. The results from simulations imitating compositionally  
 397 heterogeneous third codon position data demonstrate that compositional heterogeneity, at least in  
 398 principle, has the potential to impact the position of *Martialis*.

399 If our interpretation of these results is correct, the species-poor clade of blind and subterranean  
400 Martialinae and Leptanillinae is the sister group to the remaining 99.5% species of the Formicidae.  
401 As pointed out before (Brady et al., 2006; Rabeling et al., 2008; Pie and Feitosa, 2015), this does not  
402 necessarily mean that the most-recent common ancestor of the ants was blind and lived underground  
403 (Lucky et al., 2013). Rather, this fact may reflect lower relative extinction rates experienced by  
404 these ants, perhaps due to the long-term stability of their subterranean environments, or different  
405 relative probabilities of evolutionary transitions between subterranean and epigeic habits.

#### 406 4.2. Relationships of poneroid subfamilies

407 In addition to further insight into the placement of the root of the ant phylogeny, we find evidence  
408 for poneroid monophyly. The question of poneroid monophyly vs. paraphyly was the second  
409 outstanding issue in higher ant phylogeny highlighted in a recent review (Ward, 2014). All our em-  
410 pirical analyses suggest poneroid monophyly, and in most instances this clade receives significant  
411 support, with the notable exception of analyses of the data matrix from which GC-rich outgroups  
412 were removed, i.e., where the phylogeny was potentially more susceptible to bias. Poneroid mono-  
413 phyly was first recovered in Moreau et al. (2006) but this result was questioned as doubtful by Brady  
414 et al. (2006), who emphasized contradictory results from their Bayesian and maximum-likelihood  
415 analyses of which the former supported monophyletic poneroids but the latter did not. Brady et al.  
416 (2006) also conducted ingroup-only analyses which supported topologies where no possible root-  
417 ing could result in poneroid monophyly. Although we did not perform ingroup-only analyses here,  
418 taking into account more comprehensive taxon sampling, the higher amount of sequence data, and  
419 insensitivity of poneroid monophyly to the different data treatments, we interpret the support for  
420 the poneroid clade as strong. Poneroid monophyly has also been recovered in other phylogenetic  
421 studies of ants, including Moreau et al. (2006), some analyses of Brady et al. (2006), Ward and  
422 Fisher (2016), and a phylogenomic study (Branstetter et al., 2017b).

423 Similarly strongly-supported results involve the relationships among the poneroid clade sub-  
424 families Agroecomyrmecinae, Paraponerinae, and Ponerinae. Although very disparate morpho-  
425 logically, Agroecomyrmecinae emerge as sister to Paraponerinae with significant support in all  
426 analyses, and this clade is in turn sister to the Ponerinae.

427 Our data are inconclusive on the relative position of Proceratiinae and (Amblyoponinae plus  
428 Apomyrminae), which sometimes emerge as a clade and at other times as a grade relative to the  
429 clade composed of Agroecomyrmecinae, Paraponerinae, and Ponerinae. If other results presented  
430 here are confirmed, the placement of (Amblyoponinae plus Apomyrminae) and Proceratiinae within  
431 the poneroid group would remain the last unsolved subfamily-level relationship in ants.

#### 432 4.3. Non-monophyly of currently recognized genera

433 Our analyses recover several of the currently recognized ant genera as para- or polyphyletic. Al-  
434 though we do not favor inclusion of non-monophyletic groups in a classification, here we are only  
435 highlighting existing problems without proposing any formal taxonomic changes. We feel that  
436 proposing satisfactory resolutions requires additional research, as explained for each case below.

437 Among the Leptanillinae, we find the morphologically derived genus *Anomalomyrma* nested  
438 within samples identified by us as *Protanilla*. A more comprehensive evaluation of *Protanilla*-like  
439 leptanillines, including both males and workers, should be carried out for a better understanding

440 of diversity within the group. We find two other leptanilline genera, *Phaulomyrma* and *Yavnella*,  
441 nested within *Leptanilla*. Both these genera were described based on males not associated with  
442 workers (Wheeler and Wheeler, 1930; Kugler, 1987). Because the characters defining and differ-  
443 entiating leptanilline lineages based on males are not well understood (Ogata et al., 1995) and all of  
444 our *Leptanilla* specimens were males, we feel it would be premature to propose taxonomic changes.  
445 A critical reappraisal of leptanilline taxonomy using both morphology and molecular phylogenetics  
446 is clearly needed.

447 Our analyses find the proceratiine genus *Probolomyrmex* nested within the larger genus *Procerat-*  
448 *atium*. Several species currently in *Proceratium* were classified in the erstwhile genus *Sysphingta*.  
449 The differentiation between the two taxa was mostly based on the structure of the clypeus and  
450 shape of the petiole. Based on these characters, two of the *Proceratium* species included in our  
451 phylogeny, *P. avium* and *P. stictum*, would fit the old concept of *Sysphingta*, while the two other,  
452 *Proceratium silaceum* and *Proceratium* SC02, match *Proceratium* sensu stricto (*P. silaceum* is the  
453 type species of the genus). Previous authors (Brown, 1958; Urbani and Andrade, 2003), however,  
454 showed that considerable variation exists with regard to the characters originally used to distinguish  
455 *Proceratium* from *Sysphingta*. *Proceratium* taxonomy would thus benefit from a focused study and  
456 a re-evaluation of morphology under a modern phylogenetic framework.

457 Despite recent comprehensive taxonomic and phylogenetic work focusing on the Ponerinae  
458 (Schmidt, 2013; Schmidt and Shattuck, 2014), our analyses reveal three non-monophyletic genera  
459 within the subfamily.

460 *Cryptopone* is a case of a polyphyletic genus. The two species included here, *C. gilva* and *C.*  
461 *hartwigi*, are only very distantly related. The former is a part of the *Ponera* genus-group and the  
462 latter sister to *Fisheropone* and a part of the *Odontomachus* genus-group, as defined by Schmidt  
463 (2013). As noted by Schmidt and Shattuck (2014), the resolution of *Cryptopone* taxonomy would  
464 require a more thorough revision and sampling of all species attributed to this genus. Notably, our  
465 phylogeny did not include any species placed in the erstwhile genus *Wadeura*, which may well turn  
466 out to be yet another lineage unrelated to the type species *C. testacea*.

467 *Euponera*, which was recognized to form two morphologically distinct species groups by Schmidt  
468 and Shattuck (2014), is represented by *E. brunoi* and *E. sikorae* in our data set. In our phylogeny,  
469 *E. brunoi* is more closely related to "*Cryptopone*" *hartwigi* and *Fisheropone* than *E. sikorae*. To-  
470 gether, the paraphyletic *Euponera*, the species "*Cryptopone*" *hartwigi*, and *Fisheropone ambigua*  
471 form a well-supported group with well-resolved internal relationships. *Euponera* is divisible into  
472 two groups based on morphology but there are several species that cannot be placed with certainty  
473 even within the genus as presently defined (Schmidt and Shattuck, 2014). Assignment of *Euponera*  
474 species into two different genera should thus be postponed until more evidence is available.

475 *Mesoponera*, also found to be polyphyletic in our analyses, presents a particularly taxonomi-  
476 cally challenging genus that would require a more comprehensive reexamination of morphology  
477 and inclusion of more species in a phylogeny for satisfactory resolution. See Schmidt and Shattuck  
478 (2014) for a more thorough discussion.

#### 479 4.4. The age of extant ants

480 Our divergence-time analysis indicates that the most recent common ancestor of living ants origi-  
481 nated during the Lower Cretaceous (103–124 Ma; median 113 Ma), an age estimate considerably  
482 younger than those obtained by some other recent studies. Moreau et al. (2006) concluded that ants



483 most likely arose 140–169 Ma while [Moreau and Bell \(2013\)](#) arrived at an estimate of 139–158  
484 Ma. In contrast, [Brady et al. \(2006\)](#) proposed a younger age for the crown ants, 116–133 Ma.

485 Our study parallels the pattern for age estimates of the order Hymenoptera, which has often  
486 been inferred to be much older than the oldest hymenopteran fossils ([Ronquist et al., 2012](#); [Peters  
487 et al., 2017](#)), but under fossilized birth-death process with diversified sampling its estimated age  
488 fell to within 20 Ma from the oldest known fossils ([Zhang et al., 2016](#)). In our study, the median  
489 age for the crown Formicidae, at 113 Ma, is also about 20 Ma older than the oldest undisputed  
490 crown-group fossils ([Grimaldi and Agosti, 2000](#); [Barden, 2017](#)).

491 The ages we recovered for ant subfamilies where either few old crown-group fossils are known  
492 or only a few taxa were sampled are almost certainly underestimated (e.g. Dolichoderinae at 55 Ma,  
493 cf. [Ward et al. \(2010\)](#); Formicinae at 60 Ma, cf. [Blaimer et al. \(2015\)](#)). Future studies including  
494 more genus-level sampling of extant and extinct taxa are likely to modify these estimates in the  
495 direction of older dates.

## 496 5. Concluding remarks

497 Although more sequence data have often been shown to help resolve difficult phylogenetic ques-  
498 tions, our study of ant phylogeny shows that systematic bias not accounted for by the commonly  
499 used tree-homogeneous models may adversely affect phylogenetic inference. Simply increasing  
500 the amount of data can in fact be detrimental if added sequences have properties that violate model  
501 assumptions ([Huelsenbeck and Hillis, 1993](#)), such as the substantial among-taxon compositional  
502 heterogeneity present in third codon positions and ribosomal 28S in our data set. The ideal solution  
503 to this problem would be use of substitution models that take into account process heterogeneity  
504 across the tree. Such models have been proposed ([Foster, 2004](#); [Blanquart and Lartillot, 2008](#);  
505 [Jayaswal et al., 2014](#)), but unfortunately their current implementations do not scale well for larger  
506 data sets, even for the modest amount of data present in our alignment. Alternatively, one can as-  
507 sess model adequacy through simulation-based tests of compositional heterogeneity ([Foster, 2004](#)),  
508 as in the current study.

509 The phylogenetic hypothesis presented here for deep nodes of the ant tree of life will soon be  
510 tested with genomic-scale data. Recent advances in sequencing and analysis has already produced  
511 data matrices with hundreds or even thousands of loci ([Faircloth et al., 2014](#); [Blaimer et al., 2015](#);  
512 [Branstetter et al., 2017b](#)). As the amount of available sequence data increases, it is important that  
513 the potential for model violation is carefully evaluated, as large data sets will likely be less prone  
514 to uncertainty but instead may give strongly-supported results that are wrong instead ([Philippe and  
515 Roure, 2011](#)). Tests of compositional heterogeneity, posterior predictive approaches to assessing  
516 model fit ([Bollback, 2002](#); [Brown and EIDabaje, 2008](#); [Doyle et al., 2015](#)), or sensitivity of results  
517 to removal of sites likely to introduce bias ([Goremykin et al., 2015](#)) should become a part of the  
518 standard phylogenomics toolkit.

519 Our understanding of the timeline of ant evolution will also likely benefit from more biologi-  
520 cally realistic models resulting from recent developments in divergence-dating, such as placement  
521 of fossils using explicit information about morphology ([Ronquist et al., 2012](#); [Zhang et al., 2016](#)),  
522 and from inclusion of more sequence data as well as more comprehensive taxon sampling.

## 523 6. Acknowledgements

524 For providing specimens used in this study we are grateful to Bob Anderson, Himender Bharti,  
525 Lech Borowiec, Bui Tuan Viet, Jim Carpenter, Katsuyuki Eguchi, Juergen Gadau, Dave General,  
526 Benoit Guénard, Nihara Gunawardene, Peter Hawkes, Armin Ionesco-Hirsch, Bob Johnson, Yeo  
527 Kolo, John LaPolla, John Lattke, Jack Longino, Randy Morgan, Michael Ohl, Christian Peeters,  
528 James Pitts, Julian Resasco, Keve Ribardo, Riitta Savolainen, Chris Schmidt, Justin Schmidt, Mike  
529 Sharkey, Andy Suarez, Simon van Noort, and Masashi Yoshimura. This research was supported  
530 by U.S. National Science Foundation grants EF-0431330, DEB-1402432, DEB-0842204, DEB-  
531 1354996, DEB-1456964, and DEB-1654829.

## 532 References

- 533 Andrade, M. L. D. (1994). Fossil Odontomachiti ants from the Dominican Republic (Amber Col-  
534 lection Stuttgart: Hymenoptera, Formicidae. VII: Odontomachiti). *Stuttg. Beitr. Naturkd. Ser. B*  
535 (*Geol. Paläontol.*), 199:1–28.
- 536 Antropov, A. V. (2000). Digger wasps (Hymenoptera, Sphecidae) in Burmese amber. *Bull. Nat.*  
537 *Hist. Mus. Geol. Ser.*, 56(1):59–77.
- 538 Antropov, A. V. (2011). A new tribe of fossil digger wasps (Hymenoptera: Crabronidae) from  
539 the Upper Cretaceous New Jersey amber and its place in the subfamily Pemphredoninae. *Russ.*  
540 *Entomol. J.*, 20(3):229–240.
- 541 Archibald, S. B., Cover, S. P., and Moreau, C. S. (2006). Bulldog ants of the Eocene Okana-  
542 gan Highlands and history of the subfamily (Hymenoptera: Formicidae: Myrmeciinae). *Ann.*  
543 *Entomol. Soc. Am.*, 99(3):487–523.
- 544 Aria, C., Perrichot, V., and Nel, A. (2011). Fossil Ponerinae (Hymenoptera: Formicidae) in Early  
545 Eocene amber of France. *Zootaxa*, 2870:53–62.
- 546 Baca, S. M., Toussaint, E. F., Miller, K. B., and Short, A. E. (2017). Molecular phylogeny of the  
547 aquatic beetle family Noteridae (Coleoptera: Adepaga) with an emphasis on data partitioning  
548 strategies. *Mol. Phylogenet. Evol.*, 107:282–292.
- 549 Barden, P. (2017). Fossil ants (Hymenoptera: Formicidae): ancient diversity and the rise of modern  
550 lineages. *Myrmecol. News*, 24:1–30.
- 551 Barden, P. and Grimaldi, D. A. (2016). Adaptive radiation in socially advanced stem-group ants  
552 from the Cretaceous. *Curr. Biol.*, 26(4):515–521.
- 553 Baroni Urbani, C. (2000). Rediscovery of the Baltic amber ant genus *Prionomyrmex* (Hymenoptera,  
554 Formicidae) and its taxonomic consequences. *Eclogae Geol. Helv.*, 93:471–480.
- 555 Beaulieu, J. M., O’Meara, B. C., Crane, P., and Donoghue, M. J. (2015). Heterogeneous rates of  
556 molecular evolution and diversification could explain the Triassic age estimate for angiosperms.  
557 *Syst. Biol.*, 64(5):869–878.
- 558 Bennett, D. J. and Engel, M. S. (2005). A primitive sapygid wasp in Burmese amber (Hymenoptera:  
559 Sapygidae). *Acta Zool. Cracoviensia*, 48(3-1):1–9.

- 560 Blaimer, B. B., Brady, S. G., Schultz, T. R., Lloyd, M. W., Fisher, B. L., and Ward, P. S. (2015).  
561 Phylogenomic methods outperform traditional multi-locus approaches in resolving deep evolu-  
562 tionary history: a case study of formicine ants. *BMC Evol. Biol.*, 15(1):e271.
- 563 Blanquart, S. and Lartillot, N. (2008). A site- and time-heterogeneous model of amino acid re-  
564 placement. *Mol. Biol. Evol.*, 25(5):842–858.
- 565 Bollback, J. P. (2002). Bayesian model adequacy and choice in phylogenetics. *Mol. Biol. Evol.*,  
566 19(7):1171–1180.
- 567 Borowiec, M. L. (2016). AMAS: a fast tool for alignment manipulation and computing of summary  
568 statistics. *PeerJ*, 4:e1660.
- 569 Boudinot, B. E., Probst, R. S., Brandão, C. R. F., Feitosa, R. M., and Ward, P. S. (2016). Out of  
570 the Neotropics: newly discovered relictual species sheds light on the biogeographical history of  
571 spider ants (*Leptomyrme*, Dolichoderinae, Formicidae). *Syst. Entomol.*, 41(3):658–671.
- 572 Brady, S. G., Fisher, B. L., Schultz, T. R., and Ward, P. S. (2014). The rise of army ants and their  
573 relatives: diversification of specialized predatory doryline ants. *BMC Evol. Biol.*, 14(1):93.
- 574 Brady, S. G., Schultz, T. R., Fisher, B. L., and Ward, P. S. (2006). Evaluating alternative hypotheses  
575 for the early evolution and diversification of ants. *Proc. Natl. Acad. Sci. U.S.A.*, 103:18172–  
576 18177.
- 577 Branstetter, M. G., Danforth, B. N., Pitts, J. P., Faircloth, B. C., Ward, P. S., Buffington, M. L.,  
578 Gates, M. W., Kula, R. R., and Brady, S. G. (2017a). Phylogenomic insights into the evolution  
579 of stinging wasps and the origins of ants and bees. *Curr. Biol.*, 27(7):1019–1025.
- 580 Branstetter, M. G., Longino, J. T., Ward, P. S., and Faircloth, B. C. (2017b). Enriching the ant tree  
581 of life: enhanced UCE bait set for genome-scale phylogenetics of ants and other Hymenoptera.  
582 *Methods Ecol. Evol.*, 9:768–776.
- 583 Brothers, D. J. (1974). The first recent species of *Protomutilla* (Hymenoptera: Mutillidae; Myr-  
584 mosinae). *Psyche (Cambridge)*, 81(2):268–271.
- 585 Brown, W. L., J. (1958). Contributions toward a reclassification of the Formicidae. II. Tribe Ec-  
586 tatomini (Hymenoptera). *Bull. Mus. Comp. Zool.*, 118:173–362.
- 587 Brown, J. M. (2014). Predictive approaches to assessing the fit of evolutionary models. *Syst. Biol.*,  
588 63(3):289–292.
- 589 Brown, J. M. and Eldabaje, R. (2008). PuMA: Bayesian analysis of partitioned (and unpartitioned)  
590 model adequacy. *Bioinformatics*, 25(4):537–538.
- 591 Brown, J. W. and Smith, S. A. (2017). The past sure is tense: on interpreting phylogenetic diver-  
592 gence time estimates. *bioRxiv*.
- 593 Chomicki, G., Ward, P. S., and Renner, S. S. (2015). Macroevolutionary assembly of ant/plant  
594 symbioses: *Pseudomyrmex* ants and their ant-housing plants in the Neotropics. *Proc. R. Soc.*  
595 *Lond. Ser. B. Biol. Sci.*, 282(1819):20152200.
- 596 Darling, D. C. and Sharkey, M. J. (1990). Taxonomic names, in insects from the Santana Forma-  
597 tion, Lower Cretaceous, of Brazil. Chapter 7: Order Hymenoptera. *Bull. Amer. Mus. Nat. Hist.*,

598 195:123–153.

599 Dlussky, G. M. (1988). Ants of Sakhalin amber (Paleocene?). *Paleontolog. J.*, 22(1):50–61.

600 Dlussky, G. M. (1997). Genera of ants (Hymenoptera: Formicidae) from Baltic amber. *Paleon-*  
601 *tolog. J.*, 31:616–627.

602 Dlussky, G. M. (2009). The ant subfamilies Ponerinae, Cerapachyinae, and Pseudomyrmecinae  
603 (Hymenoptera, Formicidae) in the Late Eocene Ambers of Europe. *Paleontolog. J.*, 43(9):1043–  
604 1086.

605 Dlussky, G. M. and Perkovsky, E. E. (2002). Ants (Hymenoptera, Formicidae) from the Rovno  
606 Amber. [In Russian.]. *Vestn. Zool.*, 36(5):3–20.

607 Dlussky, G. M. and Radchenko, A. G. (2011). *Pristomyrmex rasnitsyni* sp. n., the first known fossil  
608 species of the ant genus *Pristomyrmex* mayr (Hymenoptera: Formicidae) from the Late Eocene  
609 Danish amber. *Russ. Entomol. J.*, 20(3):251–254.

610 Dlussky, G. M. and Rasnitsyn, A. P. (2003). Ants (Hymenoptera: Formicidae) of Formation Green  
611 River and some other Middle Eocene deposits of North America. *Russ. Entomol. J.*, 11(4):411–  
612 436.

613 Dlussky, G. M. and Rasnitsyn, A. P. (2009). Ants (Insecta: Vespida: Formicidae) in the Upper  
614 Eocene amber of central and eastern Europe. *Paleontolog. J.*, 43(9):1024–1042.

615 Dlussky, G. M., Rasnitsyn, A. P., and Perfilieva, K. S. (2015). The ants (Hymenoptera: Formicidae)  
616 of Bol'shaya Svetlovodnaya (Late Eocene of Sikhote-Alin, Russian Far East). *Cauc. Entomol.*  
617 *Bull.*, 11(1):131–152.

618 Dlussky, G. M., Wappler, T., and Wedmann, S. (2008). New middle Eocene formicid species from  
619 Germany and the evolution of weaver ants. *Acta Palaeontol. Polonica*, 53(4):615–626.

620 Doyle, V. P., Young, R. E., Naylor, G. J. P., and Brown, J. M. (2015). Can we identify genes with  
621 increased phylogenetic reliability? *Syst. Biol.*, 64(5):824–837.

622 Drummond, A. J. and Rambaut, A. (2007). BEAST: bayesian evolutionary analysis by sampling  
623 trees. *BMC Evol. Biol.*, 7(1):214.

624 Engel, M. S. (2008). The wasp family Rhopalosomatidae in mid-Cretaceous amber from Myanmar  
625 (Hymenoptera: Vespoidea). *J. Kansas Entomol. Soc.*, 81(3):168–174.

626 Engel, M. S., Ortega-Blanco, J., and Bennett, D. J. (2009). A remarkable tiphiiiform wasp in  
627 mid-Cretaceous amber from Myanmar (Hymenoptera: Tiphidae). *Trans. Kans. Acad. Sci.*,  
628 112(1/2):1–6.

629 Faircloth, B. C., Branstetter, M. G., White, N. D., and Brady, S. G. (2014). Target enrichment of  
630 ultraconserved elements from arthropods provides a genomic perspective on relationships among  
631 Hymenoptera. *Mol. Ecol. Resour.*, 15(3):489–501.

632 Foster, P. (2004). Modeling compositional heterogeneity. *Syst. Biol.*, 53(3):485–495.

633 Frandsen, P. B., Calcott, B., Mayer, C., and Lanfear, R. (2015). Automatic selection of partitioning  
634 schemes for phylogenetic analyses using iterative k-means clustering of site rates. *BMC Evol.*  
635 *Biol.*, 15(1):13.

- 636 Gascuel, O. (1997). BIONJ: an improved version of the NJ algorithm based on a simple model of  
637 sequence data. *Mol. Biol. Evol.*, 14(7):685–695.
- 638 Goremykin, V. V., Nikiforova, S. V., Cavalieri, D., Pindo, M., and Lockhart, P. (2015). The root of  
639 flowering plants and total evidence. *Syst. Biol.*, 64(5):879–891.
- 640 Grimaldi, D. and Agosti, D. (2000). A formicine in New Jersey Cretaceous amber (Hymenoptera:  
641 Formicidae) and early evolution of the ants. *Proc. Natl. Acad. Sci. U.S.A.*, 97:13678–13683.
- 642 Guindon, S., Dufayard, J. F., Lefort, V., Anisimova, M., Hordijk, W., and Gascuel, O. (2010).  
643 New algorithms and methods to estimate maximum-likelihood phylogenies: Assessing the per-  
644 formance of PhyML 3.0. *Syst. Biol.*, 59(3):307–321.
- 645 Heath, T. A., Huelsenbeck, J. P., and Stadler, T. (2014). The fossilized birth-death process for  
646 coherent calibration of divergence-time estimates. *Proc. Natl. Acad. Sci. U.S.A.*, 111(29):E2957–  
647 E2966.
- 648 Höhna, S., Stadler, T., Ronquist, F., and Britton, T. (2011). Inferring speciation and extinction rates  
649 under different sampling schemes. *Mol. Biol. Evol.*, 28(9):2577–2589.
- 650 Hölldobler, B. and Wilson, E. O. (1990). *The ants*. Harvard University Press.
- 651 Huelsenbeck, J. P. and Hillis, D. M. (1993). Success of phylogenetic methods in the four-taxon  
652 case. *Syst. Biol.*, 42(3):247–264.
- 653 Jayaswal, V., Wong, T. K. F., Robinson, J., Poladian, L., and Jermini, L. S. (2014). Mixture models  
654 of nucleotide sequence evolution that account for heterogeneity in the substitution process across  
655 sites and across lineages. *Syst. Biol.*, 63(5):726–742.
- 656 Jermini, L., Ho, S. Y., Ababneh, F., Robinson, J., and Larkum, A. W. (2004). The biasing effect  
657 of compositional heterogeneity on phylogenetic estimates may be underestimated. *Syst. Biol.*,  
658 53(4):638–643.
- 659 Kugler, J. (1987). The Leptanillinae (Hymenoptera: Formicidae) of Israel and a description of a  
660 new species from India. *Isr. J. Entomol.*, 20:45–57.
- 661 Kück, P., Hita Garcia, F., Misof, B., and Meusemann, K. (2011). Improved phylogenetic anal-  
662 yses corroborate a plausible position of *Martialis heureka* in the ant tree of life. *PLoS ONE*  
663 ([doi:10.1371/journal.pone.0021031](https://doi.org/10.1371/journal.pone.0021031)), 6:e21031.
- 664 Lanfear, R., Frandsen, P. B., Wright, A. M., Senfeld, T., and Calcott, B. (2017). PartitionFinder  
665 2: new methods for selecting partitioned models of evolution for molecular and morphological  
666 phylogenetic analyses. *Mol. Biol. Evol.*, 34(3):772–773.
- 667 Lapolla, J. S. and Greenwalt, D. E. (2015). Fossil ants (Hymenoptera: Formicidae) of the Middle  
668 Eocene Kishenehn Formation. *Sociobiology*, 62(2):163–174.
- 669 Lelej, A. S. (1986). Males of the genus *Protomutilla* (Hymenoptera, Mutillidae) from Baltic amber.  
670 *Paleontol. Zh.*, 4:104–106.
- 671 Lucky, A., Trautwein, M. D., Guénard, B. S., Weiser, M. D., and Dunn, R. R. (2013). Tracing the  
672 rise of ants - out of the ground. *PLoS ONE*, 8(12):e84012.
- 673 MacKay, W. P. (1991). *Anochetus brevidentatus*, new species, a second fossil Odontomachiti ant

- 674 (Hymenoptera: Formicidae). *J. N. Y. Entomol. Soc.*, 99(1):138–140.
- 675 Maddison, D. R. and Maddison, W. P. (2005). MacClade 4., v. 4.08 for OSX.
- 676 Mayr, G. (1868). Die Ameisen des baltischen Bernsteins. *Beitr. Naturkd. Preuss.*, 1:1–102.
- 677 McKellar, R. C., Glasier, J. R. N., and Engel, M. S. (2013). New ants (Hymenoptera: Formicidae:  
678 Dolichoderinae) from Canadian Late Cretaceous amber. *Bull. Geosci.*, 88(3):583–594.
- 679 Minh, B. Q., Nguyen, M. A. T., and von Haeseler, A. (2013). Ultrafast approximation for phylo-  
680 genetic bootstrap. *Mol. Biol. Evol.*, 30(5):1188–1195.
- 681 Moreau, C. S. and Bell, C. D. (2013). Testing the museum versus cradle tropical biological diversity  
682 hypothesis: phylogeny, diversification, and ancestral biogeographic range evolution of the ants.  
683 *Evolution*, 67(8):2240–2257.
- 684 Moreau, C. S., Bell, C. D., Vila, R., Archibald, S. B., and Pierce, N. E. (2006). Phylogeny of the  
685 ants: diversification in the age of angiosperms. *Science*, 312:101–104.
- 686 Nguyen, L.-T., Schmidt, H. A., von Haeseler, A., and Minh, B. Q. (2014). IQ-TREE: a fast and  
687 effective stochastic algorithm for estimating maximum-likelihood phylogenies. *Mol. Biol. Evol.*,  
688 32(1):268–274.
- 689 Nguyen, N. D., Mirarab, S., Kumar, K., and Warnow, T. (2015). Ultra-large alignments using  
690 phylogeny-aware profiles. *Genome Biol.*, 16(1):124.
- 691 Ogata, K., Terayama, M., and Masuko, K. (1995). The ant genus *Leptanilla*: discovery of the  
692 worker-associated male of *L. japonica*, and a description of a new species from Taiwan (Hy-  
693 menoptera: Formicidae: Leptanillinae). *Syst. Entomol.*, 20:27–34.
- 694 Ohl, M. (2004). The first fossil representative of the wasp genus *Dolichurus*, with a review of fossil  
695 Ampulicidae (Hymenoptera: Apoidea). *J. Kansas Entomol. Soc.*, 77(4):332–342.
- 696 Perrichot, V. (2015). A new species of *Baikuris* (Hymenoptera: Formicidae: Sphecomyrminae) in  
697 mid-Cretaceous amber from France. *Cretaceous Res.*, 52(B):585–590.
- 698 Perrichot, V., Lacau, S., Néraudeau, D., and Nel, A. (2008). Fossil evidence for the early ant  
699 evolution. *Naturwissenschaften*, 95(2):85–90.
- 700 Peters, R. S., Krogmann, L., Mayer, C., Donath, A., Gunkel, S., Meusemann, K., Kozlov, A.,  
701 Podsiadlowski, L., Petersen, M., Lanfear, R., Diez, P. A., Heraty, J., Kjer, K. M., Klopstein,  
702 S., Meier, R., Polidori, C., Schmitt, T., Liu, S., Zhou, X., Wappler, T., Rust, J., Misof, B., and  
703 Niehuis, O. (2017). Evolutionary history of the hymenoptera. *Curr. Biol.*, 27(7):1013–1018.
- 704 Philippe, H. and Roure, B. (2011). Difficult phylogenetic questions: more data, maybe; better  
705 methods, certainly. *BMC Biol.*, 9(1):91.
- 706 Pie, M. R. and Feitosa, R. M. (2015). Relictual ant lineages (Hymenoptera: Formicidae) and their  
707 evolutionary implications. *Myrmecol. News*, 22:55–58.
- 708 Pilgrim, E. M., Dohlen, C. D. V., and Pitts, J. P. (2008). Molecular phylogenetics of Vespoidea  
709 indicate paraphyly of the superfamily and novel relationships of its component families and  
710 subfamilies. *Zool. Scripta*, 37(5):539–560.

- 711 Poinar, G. O. (2009). *Melittosphex* (Hymenoptera: Melittosphecidae), a primitive bee and not a  
712 wasp. *Palaeontology*, 52(2):483–484.
- 713 Poinar, G. O. and Danforth, B. N. (2006). A fossil bee from Early Cretaceous Burmese amber.  
714 *Science*, 314(5799):614.
- 715 Rabeling, C., Brown, J. M., and Verhaagh, M. (2008). Newly discovered sister lineage sheds light  
716 on early ant evolution. *Proc. Natl. Acad. Sci. U.S.A.*, 105:14913–14917.
- 717 Radchenko, A. G., Elmes, G. W., and Dlussky, G. (2007). The ants of the genus *Myrmica*  
718 (Hymenoptera, Formicidae) from Baltic and Saxonian amber (Late Eocene). *J. Paleontol.*,  
719 81(6):1494–1501.
- 720 Rasnitsyn, A. P. and Jarzembowski, E. A. (1998). Systematic part, in wasps (Insecta: Vespida  
721 = Hymenoptera) from the Purbeck and Wealden Supergroups (Lower Cretaceous) of southern  
722 England and their biostratigraphical and palaeoenvironmental significance. *Cretaceous Res.*,  
723 19(3/4):329–391.
- 724 Rasnitsyn, A. P. and Martínez-Delclòs, X. (2000). Wasps (Insecta: Vespida = Hymenoptera) from  
725 the Early Cretaceous of Spain. *Acta Geol. Hisp.*, 35(1-2):65–96.
- 726 Rodriguez, J., Waichert, C., Dohlen, C. D. V., Jr, G. P., and Pitts, J. P. (2016). Eocene and not  
727 Cretaceous origin of spider wasps: fossil evidence from amber. *Acta Palaeontol. Polonica*,  
728 61(1):89–96.
- 729 Ronquist, F., Teslenko, M., van der Mark, P., Ayres, D. L., Darling, A., Höhna, S., Larget, B., Liu,  
730 L., Suchard, M. A., and Huelsenbeck, J. P. (2012). MrBayes 3.2: efficient bayesian phylogenetic  
731 inference and model choice across a large model space. *Syst. Biol.*, 61(3):539–542.
- 732 Rust, J. and Andersen, N. M. (1999). Giant ants from the Paleogene of Denmark with a discussion  
733 of the fossil history and early evolution of ants (Hymenoptera: Formicidae). *Zool. J. Linn. Soc.*,  
734 125(3):331–348.
- 735 Sanderson, M. J. (2002). Estimating absolute rates of molecular evolution and divergence times: a  
736 penalized likelihood approach. *Mol. Biol. Evol.*, 19(1):101–109.
- 737 Schmidt, C. (2013). Molecular phylogenetics of ponerine ants (Hymenoptera: Formicidae: Poner-  
738 inae). *Zootaxa*, 3647:201–250.
- 739 Schmidt, C. A. and Shattuck, S. O. (2014). The higher classification of the ant subfamily Ponerinae  
740 (Hymenoptera: Formicidae), with a review of ponerine ecology and behavior. *Zootaxa*, 3817:1–  
741 242.
- 742 Stamatakis, A. (2014). RAxML version 8: a tool for phylogenetic anal. and post-analysis of large  
743 phylogenies. *Bioinformatics*, 30(9):1312–1313.
- 744 Takezaki, N. and Nishihara, H. (2016). Resolving the phylogenetic position of coelacanth: the  
745 closest relative is not always the most appropriate outgroup. *Genome Biol. Evol.*, 8(4):1208–  
746 1221.
- 747 Thompson, J. D., Gibson, T. J., Plewniak, F., Jeanmougin, F., and Higgins, D. G. (1997). The  
748 CLUSTAL\_x windows interface: flexible strategies for multiple sequence alignment aided by  
749 quality analysis tools. *Nucleic Acids Res.*, 25(24):4876–4882.

- 750 Urbani, C. B. (1980). *Anochetus corayi* n. sp., the first fossil Odontomachiti ant. (Amber Collection  
751 Stuttgart: Hymenoptera, Formicidae. II: Odontomachiti). *Stuttg. Beitr. Naturkd. Ser. B (Geol.*  
752 *Paläontol.)*, (55):1–6.
- 753 Urbani, C. B. and Andrade, M. L. D. (2003). The ant genus *Proceratium* in the extant and fossil  
754 rec. (Hymenoptera: Formicidae). *Mus. Reg. Sci. Nat. Monogr. (Turin)*, 36:1–492.
- 755 Wappler, T., Dlussky, G. M., Engel, M. S., Prokop, J., and Knor, S. (2014). A new trap-jaw  
756 ant species of the genus *Odontomachus* (Hymenoptera: Formicidae: Ponerinae) from the Early  
757 Miocene (Burdigalian) of the Czech Republic. *Paläontolog. Z.*, 88(4):495–502.
- 758 Ward, P. S. (2014). The phylogeny and evolution of ants. *Annu. Rev. Ecol. Evol. Syst.*, 45:23–43.
- 759 Ward, P. S., Brady, S. G., Fisher, B. L., and Schultz, T. R. (2010). Phylogeny and biogeography of  
760 dolichoderine ants: effects of data partitioning and relict taxa on historical inference. *Syst. Biol.*,  
761 59:342–362.
- 762 Ward, P. S., Brady, S. G., Fisher, B. L., and Schultz, T. R. (2015). The evolution of myrmicine ants:  
763 phylogeny and biogeography of a hyperdiverse ant clade (Hymenoptera: Formicidae). *Syst.*  
764 *Entomol.*, 40(1):61–81.
- 765 Ward, P. S. and Fisher, B. L. (2016). Tales of dracula ants: the evolutionary history of the ant  
766 subfamily Amblyoponinae (Hymenoptera: Formicidae). *Syst. Entomol.*, 41(3):683–693.
- 767 Wheeler, G. C. and Wheeler, E. W. (1930). Two new ants from Java. *Psyche (Cambridge)*, 37:193–  
768 201.
- 769 Wheeler, W. M. (1915). The ants of the Baltic amber. *Schr. Phys.-Ökon. Ges. Königsb.*, (55):1–142.
- 770 Wilson, E. O. (2004). The biogeography of the West Indian ants (Hymenoptera: Formicidae). In  
771 Liebherr, J. K., editor, *Zoogeography of Caribbean insects*, chapter 10, pages 266–290. Cornell  
772 University Press, Ithaca, New York.
- 773 Zhang, C., Stadler, T., Klopstein, S., Heath, T. A., and Ronquist, F. (2016). Total-evidence dating  
774 under the fossilized birth–death process. *Syst. Biol.*, 65(2):228–249.



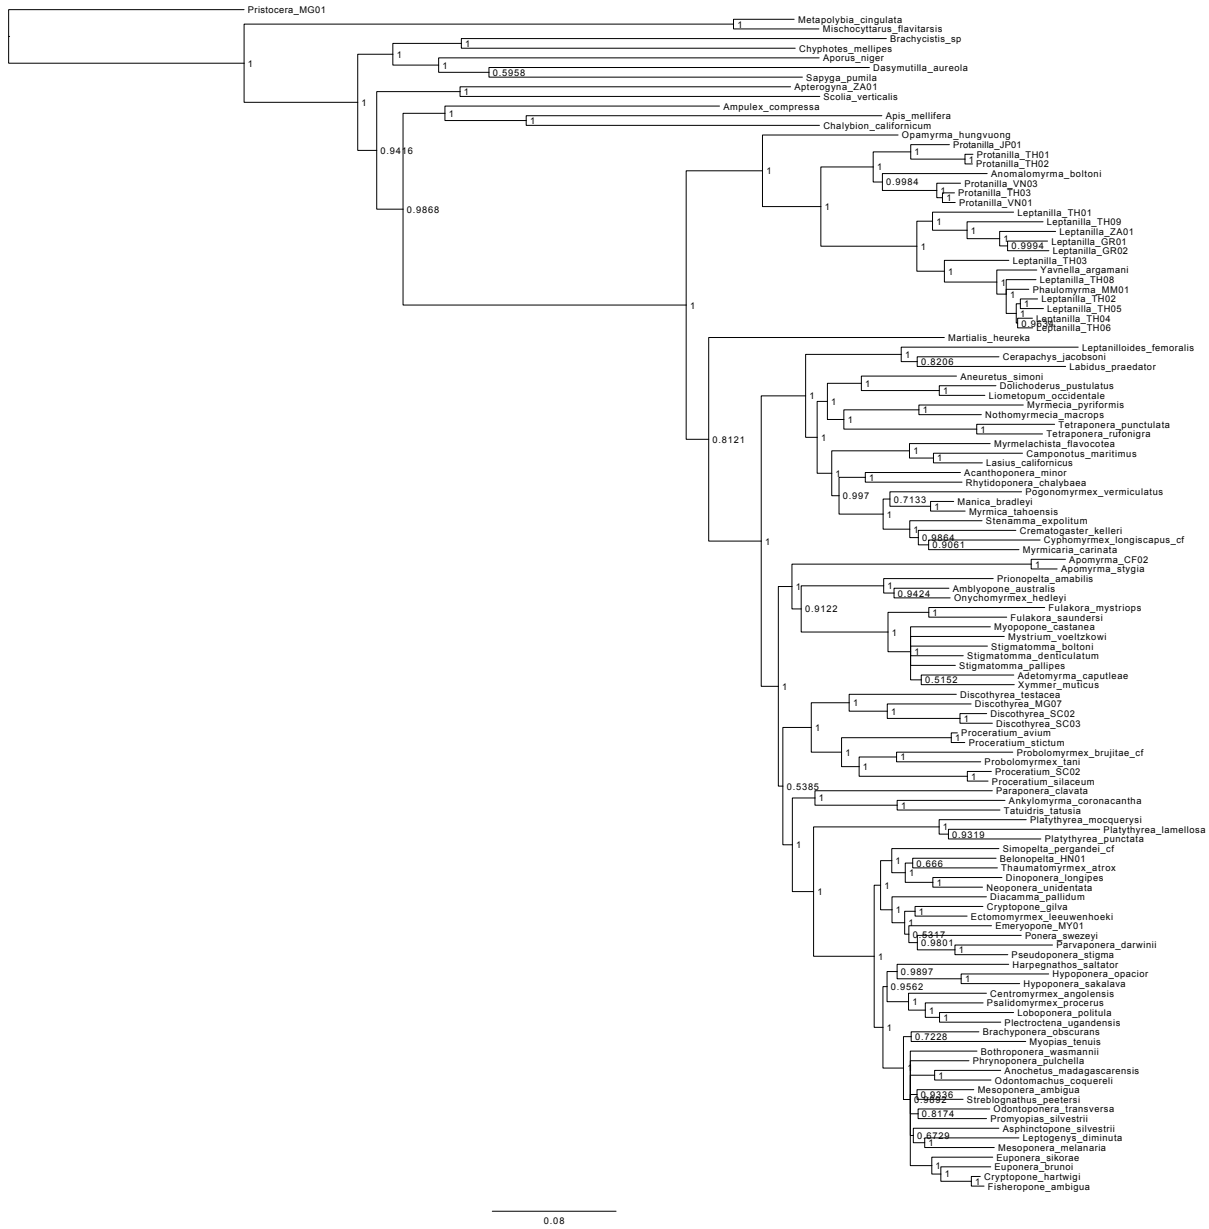

Supplementary Figure 1: Bayesian consensus tree inferred under greedy partitioning strategy for full data set.

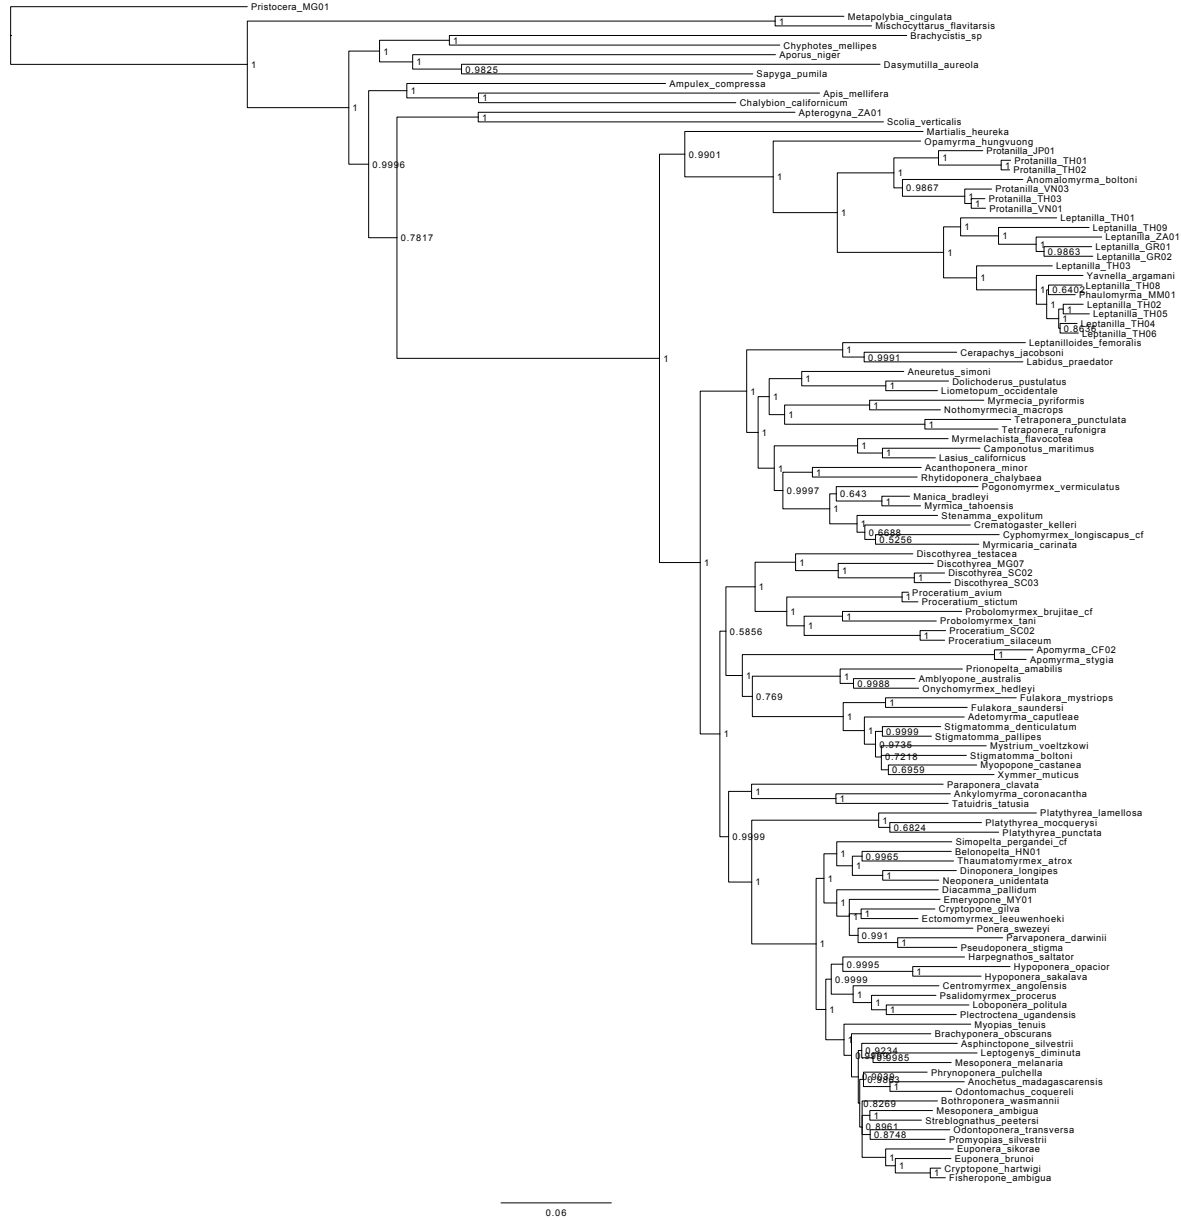

Supplementary Figure 2: Bayesian consensus tree inferred under k-means partitioning strategy for full data set.

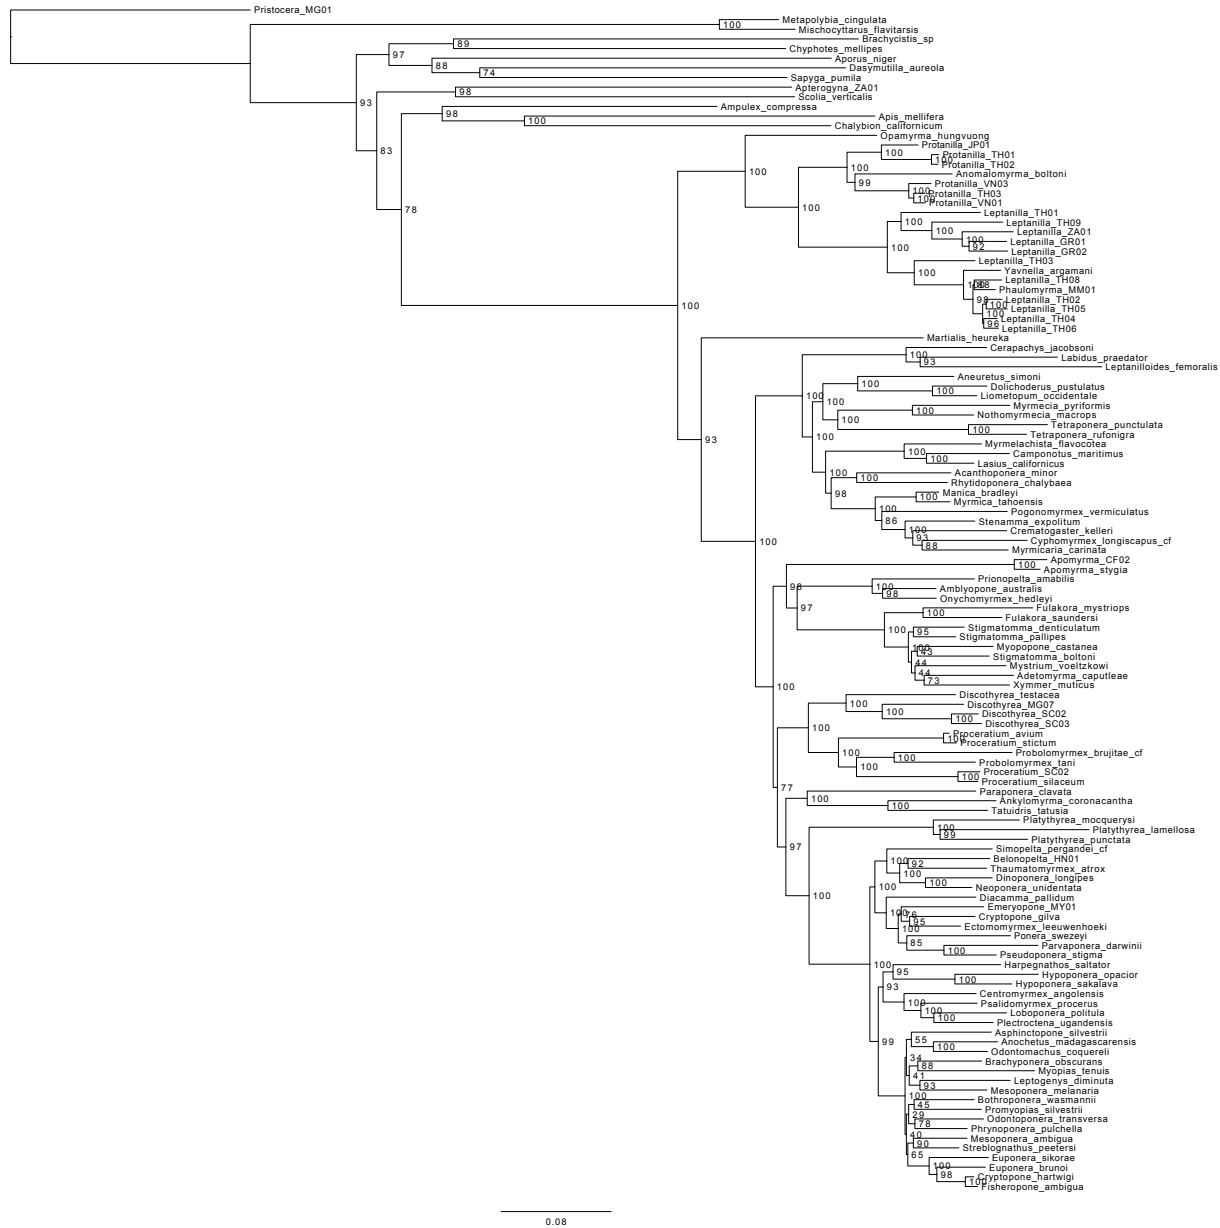

Supplementary Figure 3: Maximum-likelihood tree inferred under greedy partitioning strategy for full data set.

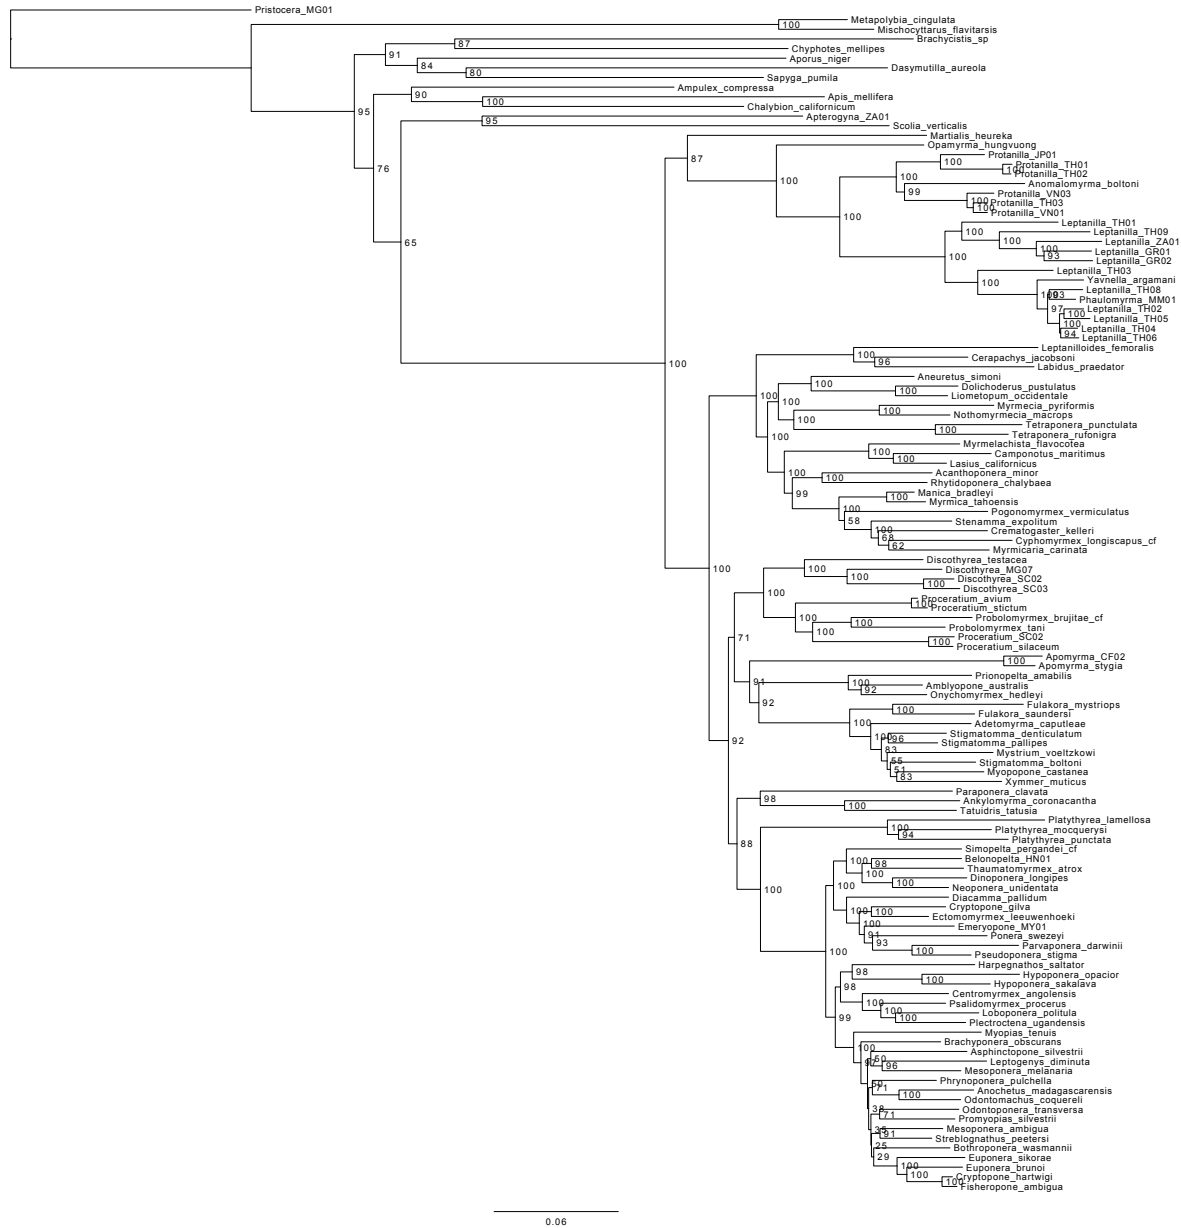

Supplementary Figure 4: Maximum-likelihood tree inferred under k-means partitioning strategy for full data set.

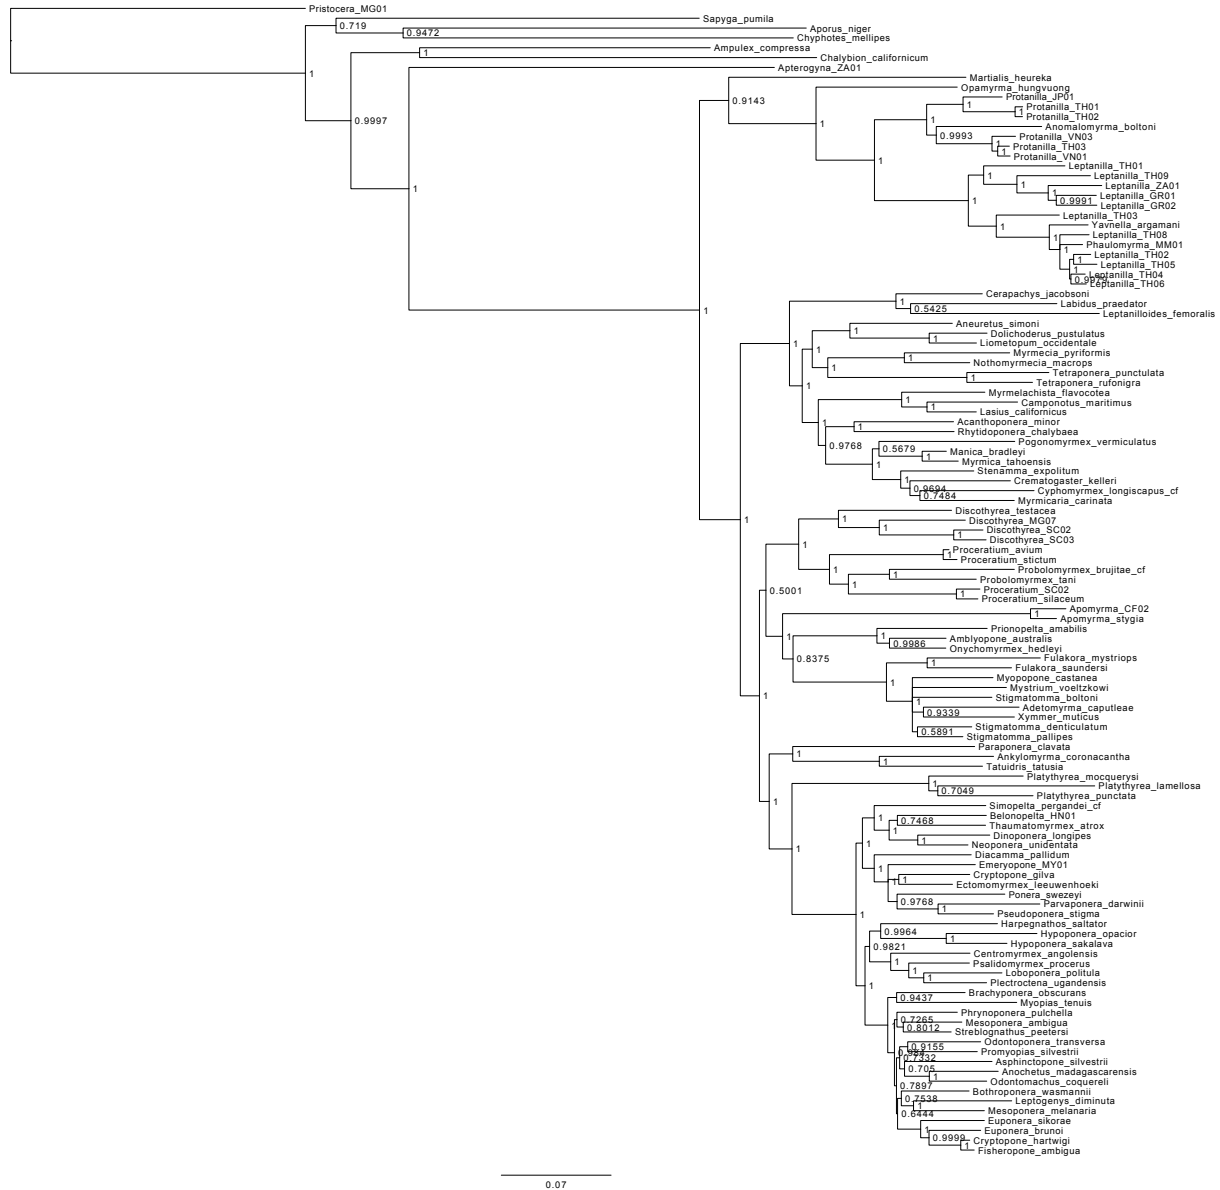

Supplementary Figure 5: Bayesian consensus tree inferred under greedy partitioning strategy for dataset with AT-rich outgroups removed.

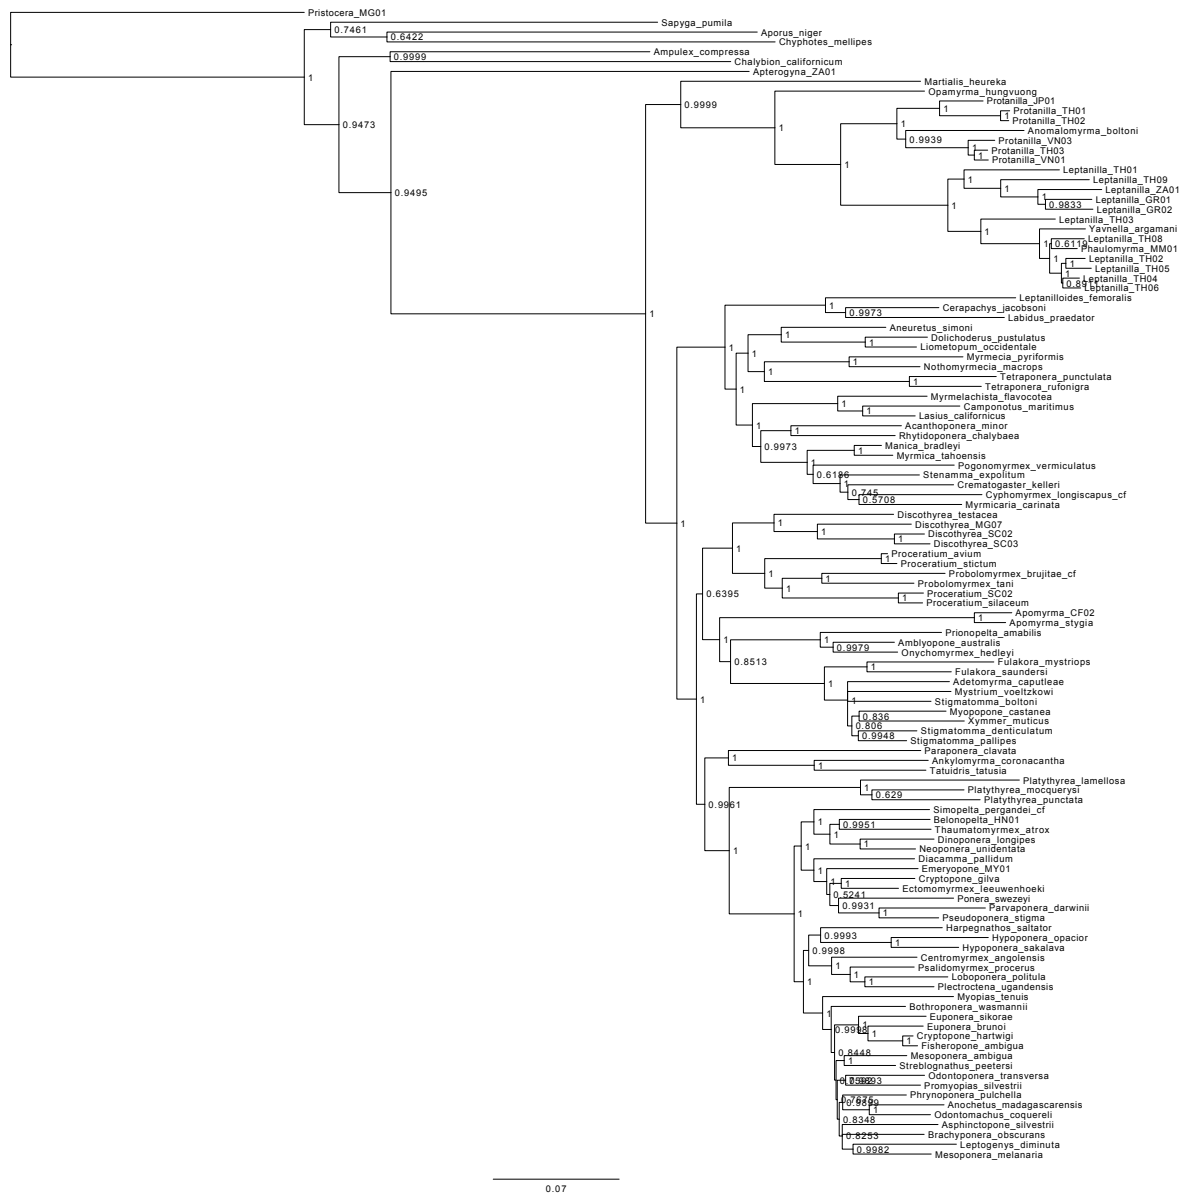

Supplementary Figure 6: Bayesian consensus tree inferred under k-means partitioning strategy for dataset with AT-rich outgroups removed.

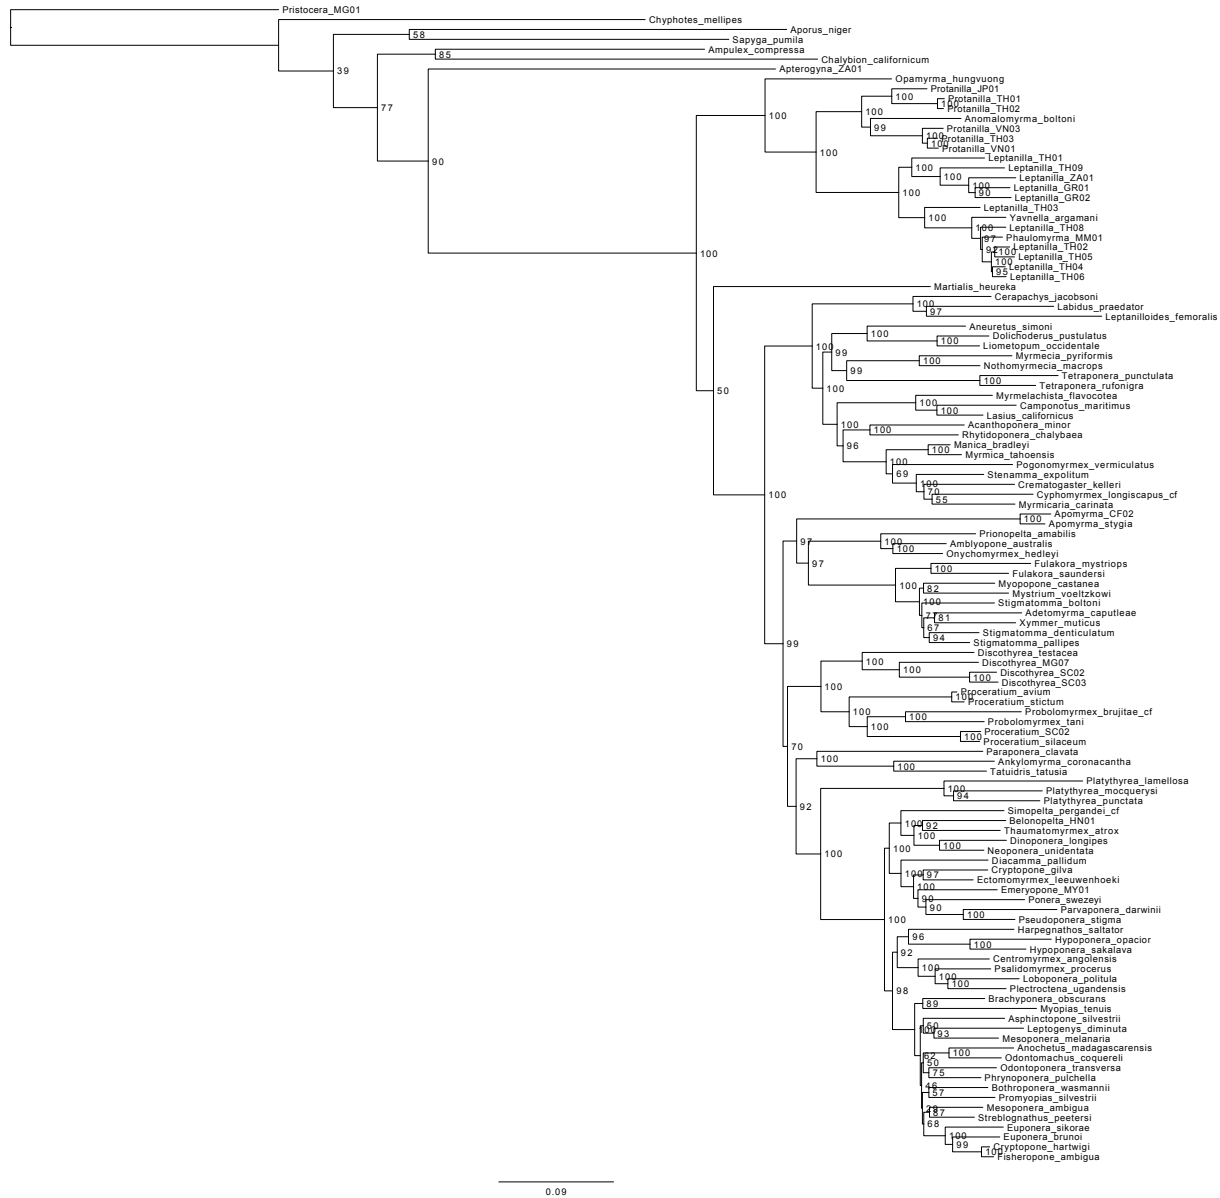

Supplementary Figure 7: Maximum-likelihood tree inferred under greedy partitioning strategy for dataset with AT-rich outgroups removed.

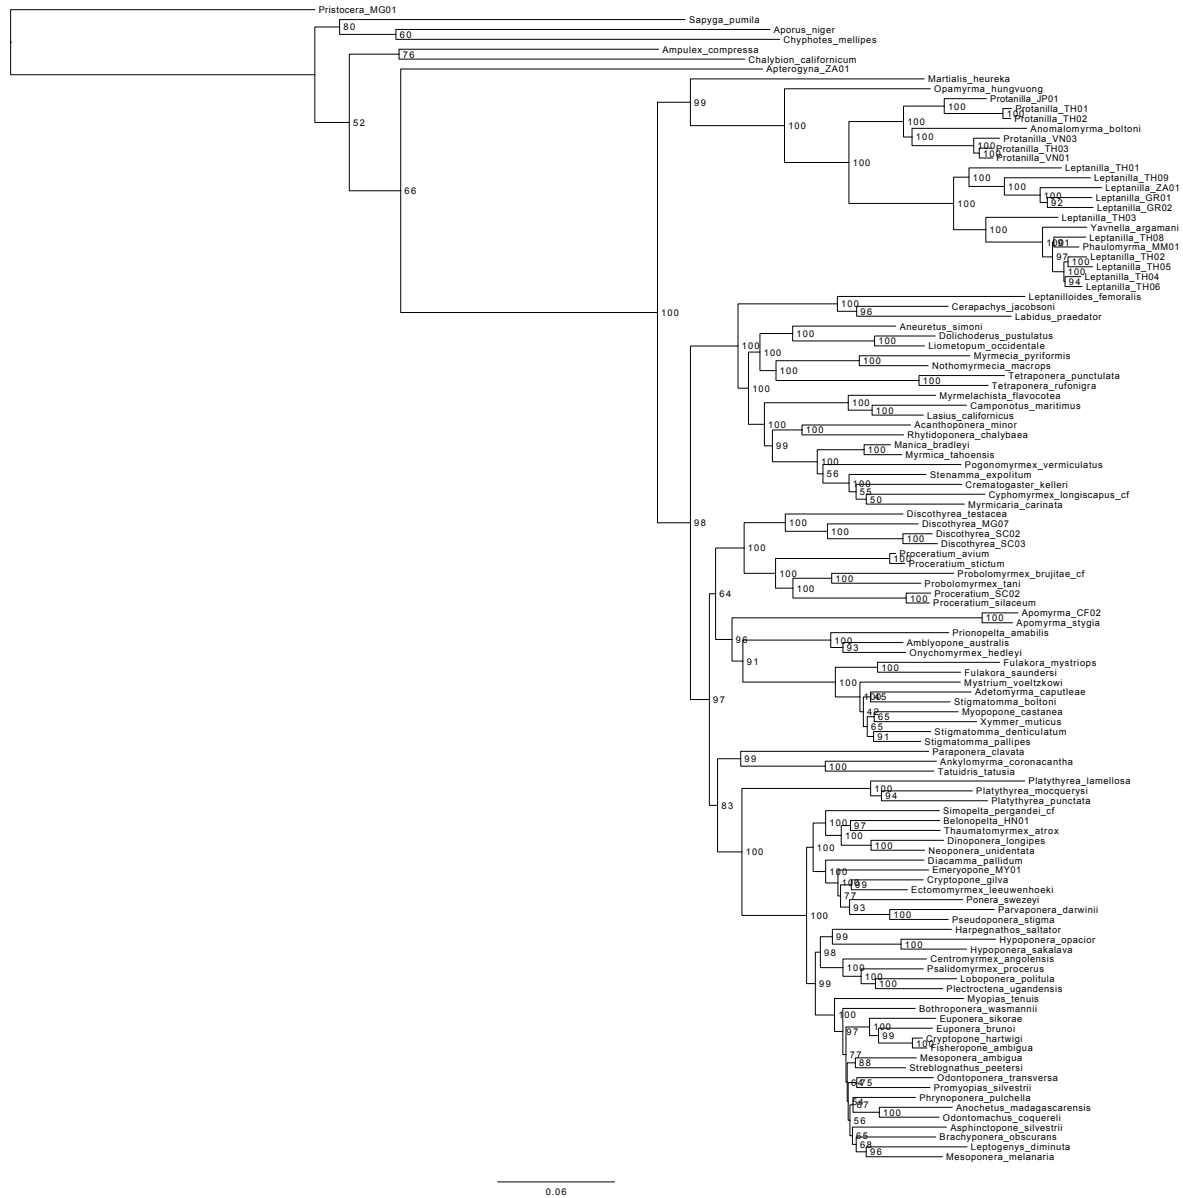

Supplementary Figure 8: Maximum-likelihood tree inferred under k-means partitioning strategy for dataset with AT-rich outgroups removed.



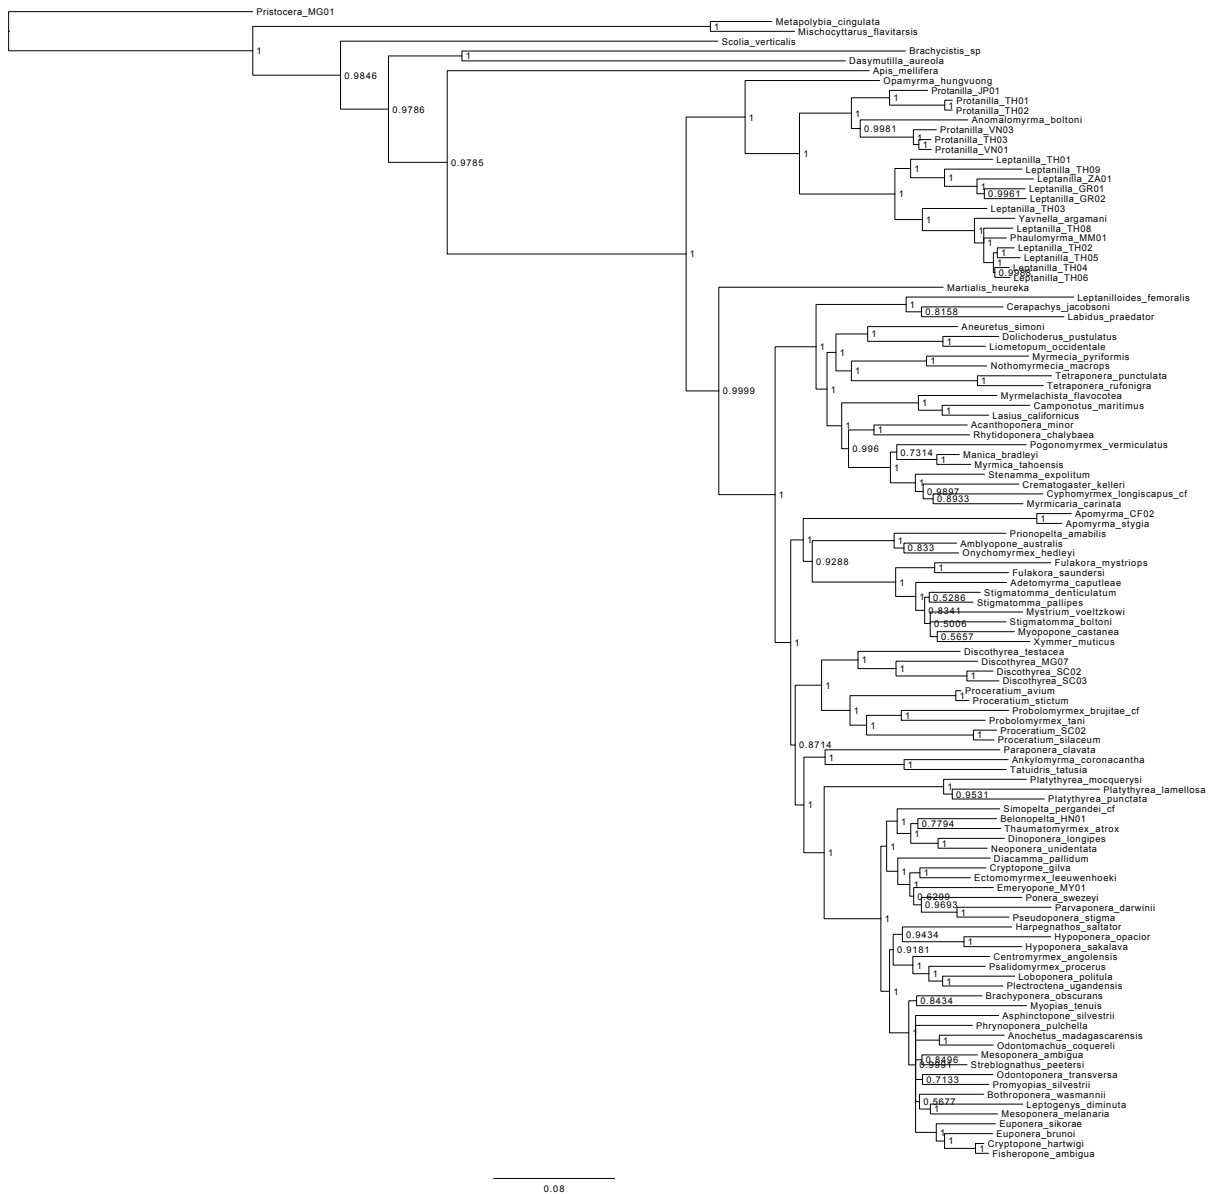

Supplementary Figure 9: Bayesian consensus tree inferred under greedy partitioning strategy for dataset with GC-rich outgroups removed.

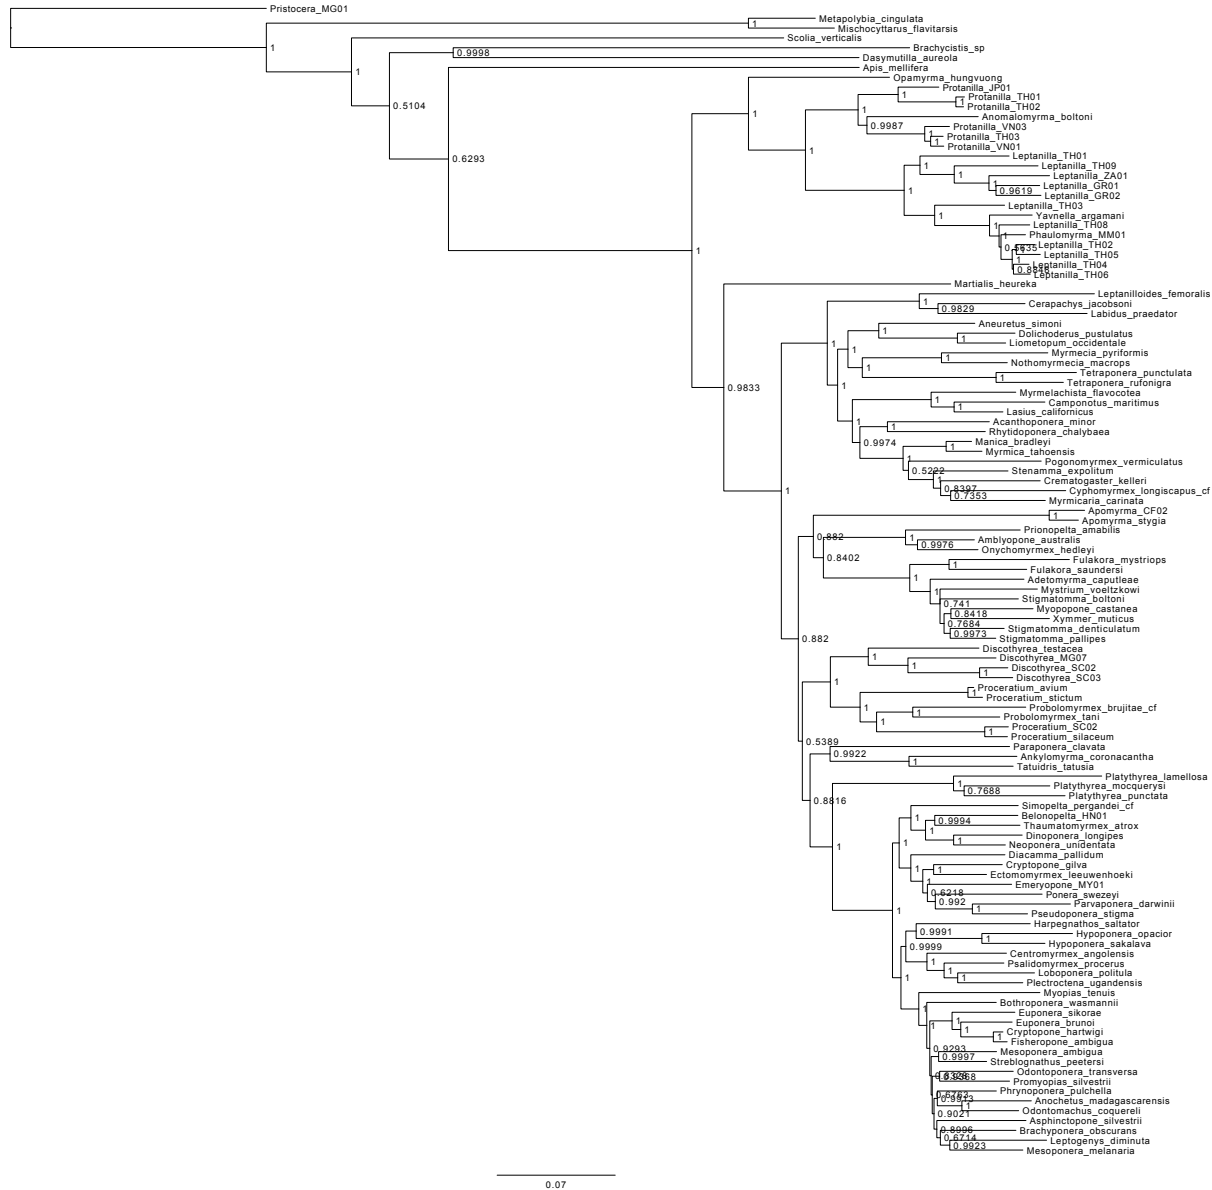

Supplementary Figure 10: Bayesian consensus tree inferred under k-means partitioning strategy for dataset with GC-rich outgroups removed.

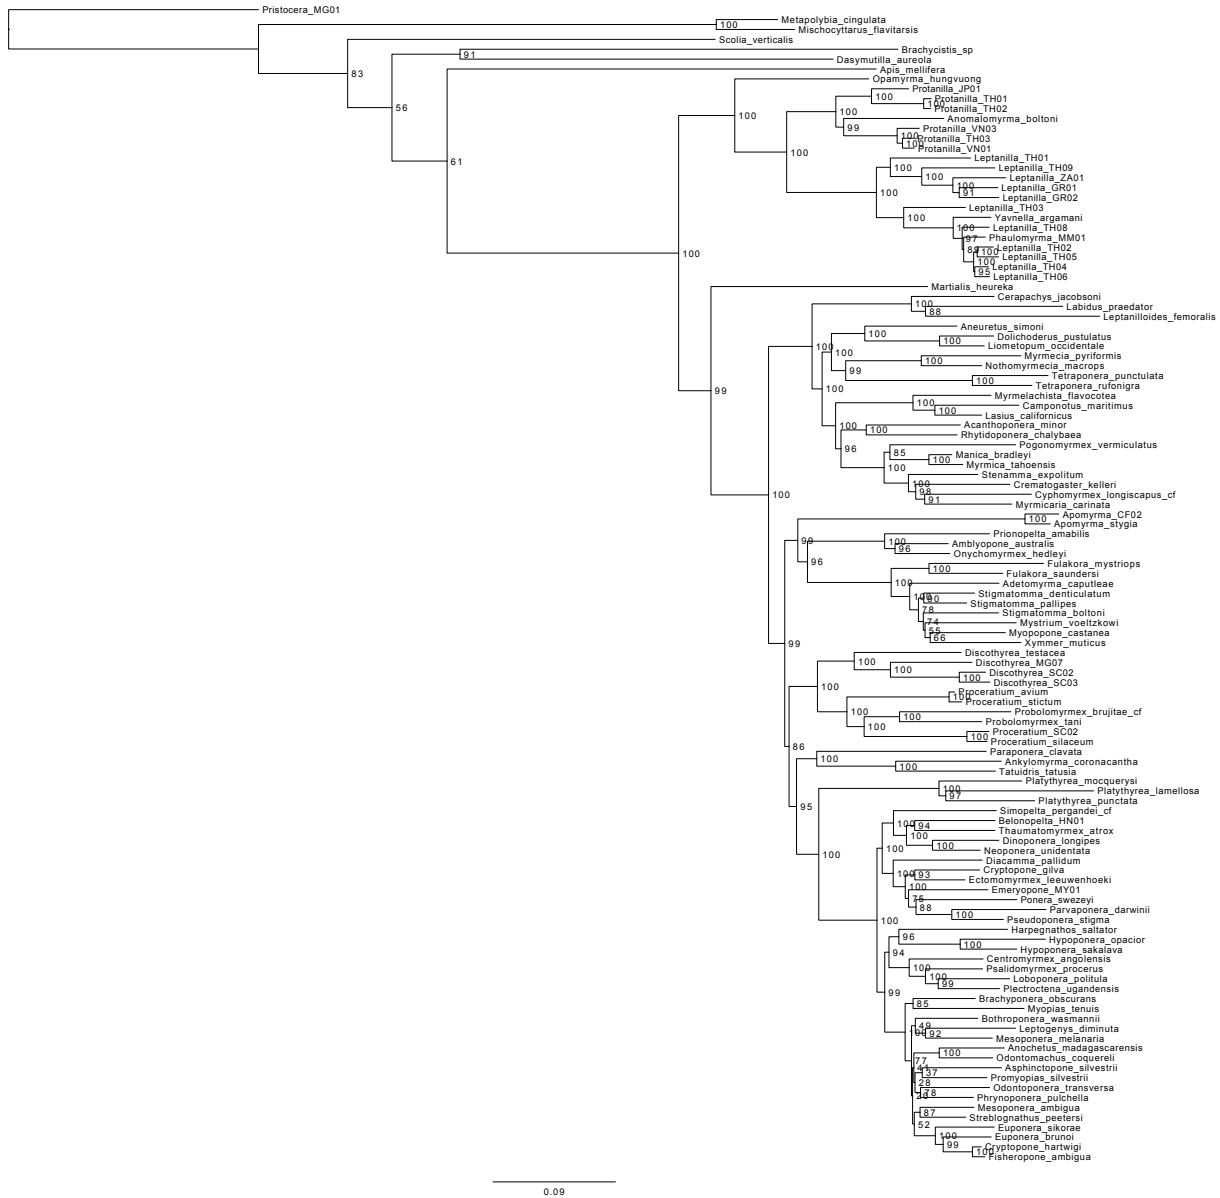

Supplementary Figure 11: Maximum-likelihood tree inferred under greedy partitioning strategy for dataset with GC-rich outgroups removed.

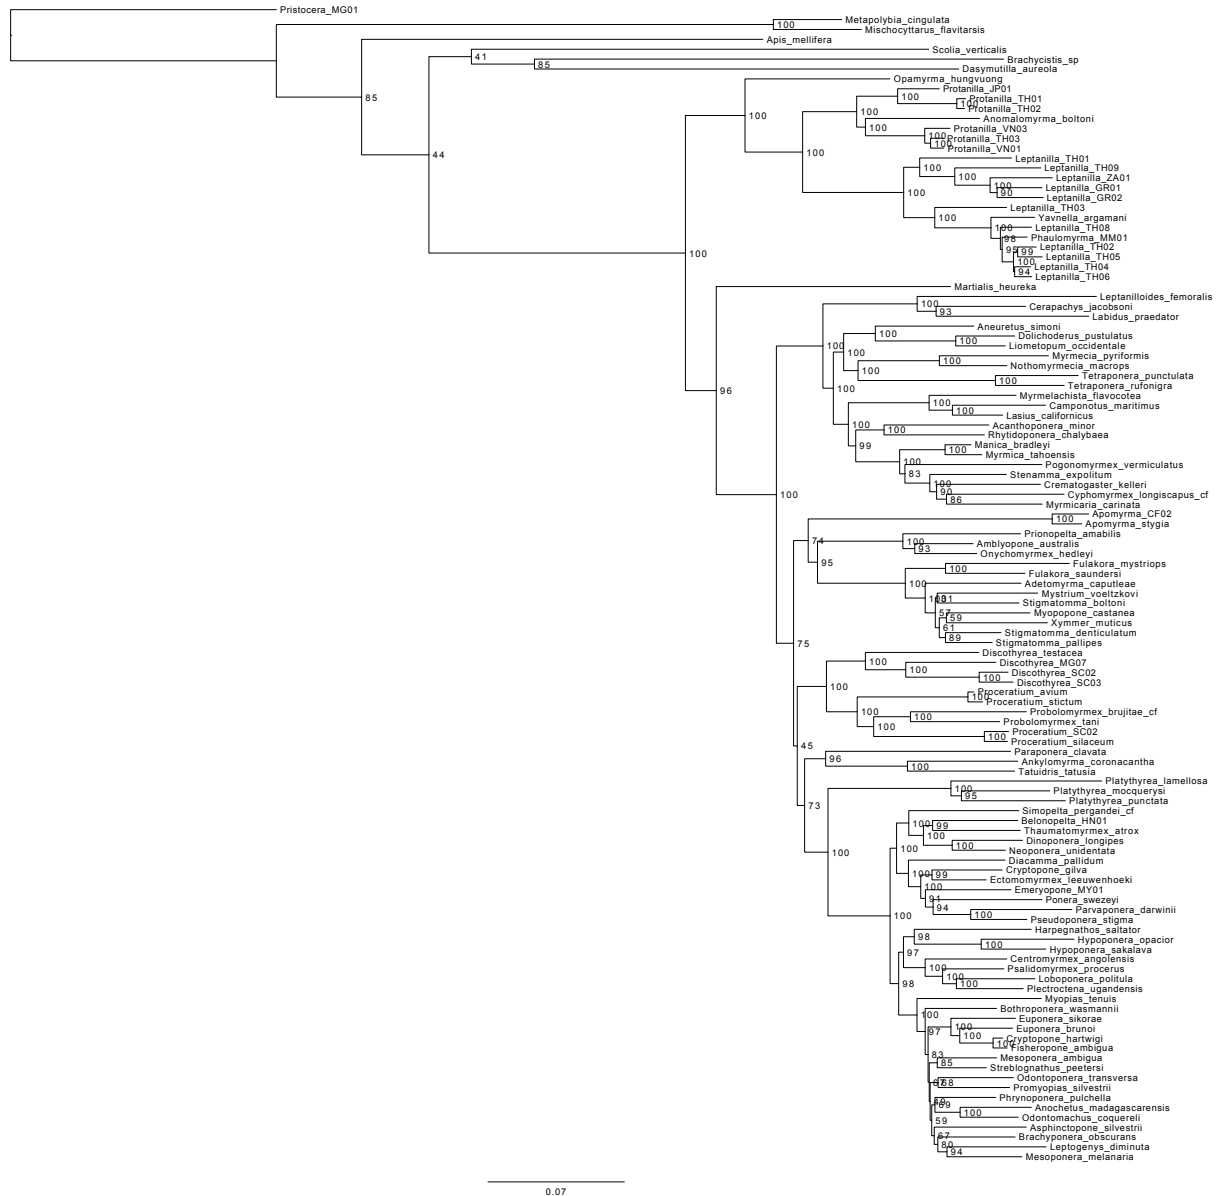

Supplementary Figure 12: Maximum-likelihood tree inferred under k-means partitioning strategy for dataset with GC-rich outgroups removed.

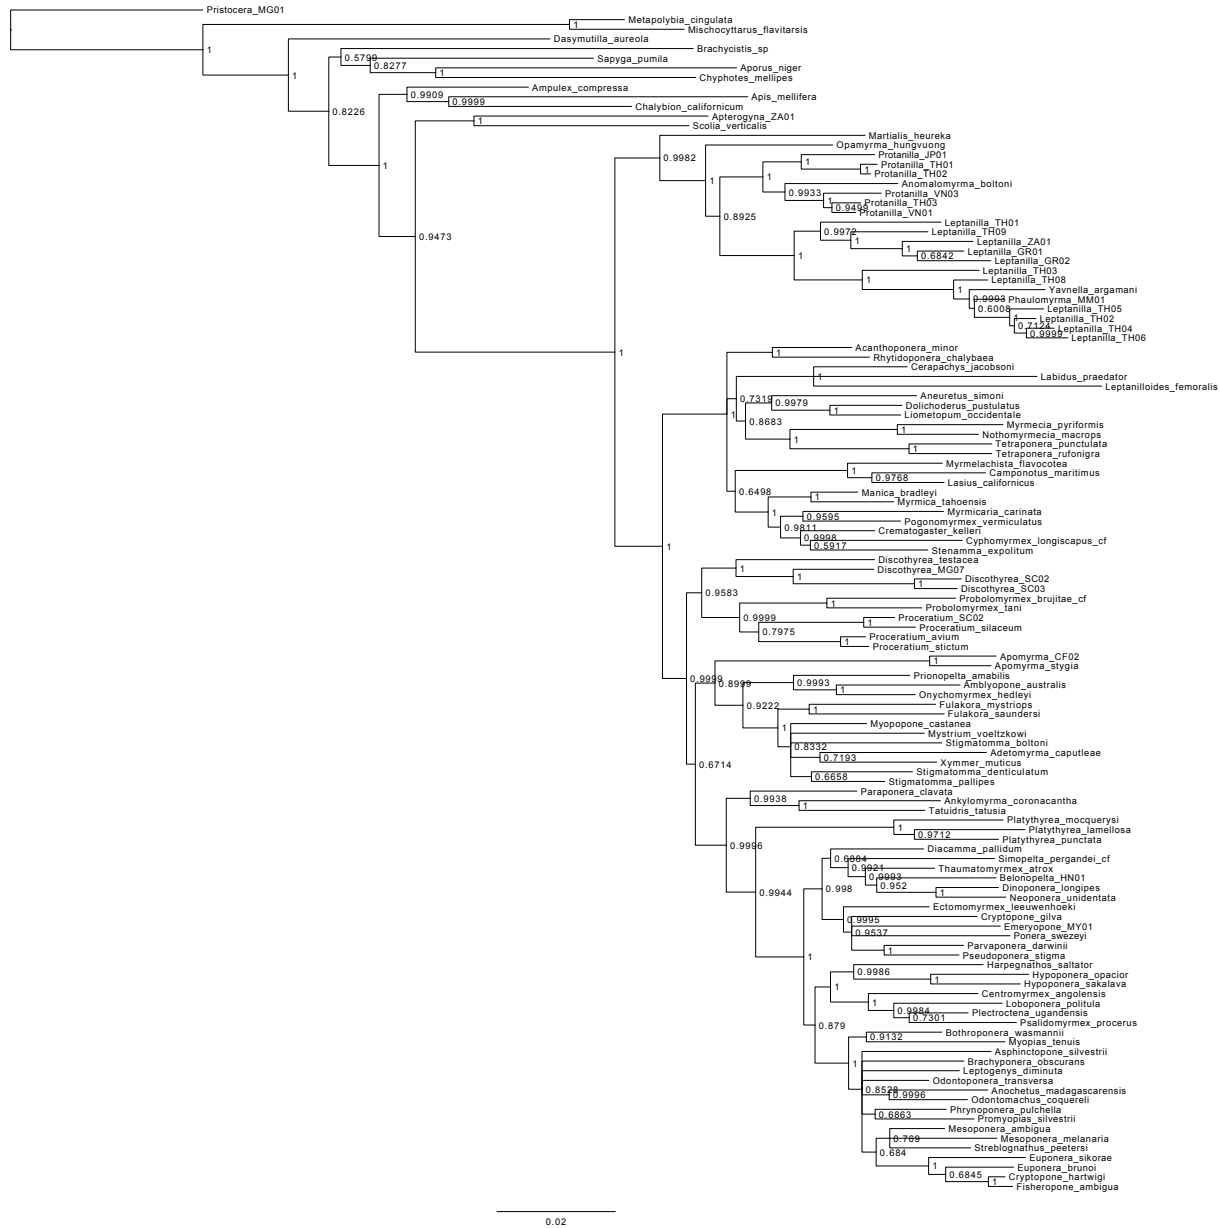

Supplementary Figure 13: Bayesian consensus tree inferred under greedy partitioning strategy for compositionally homogeneous dataset.

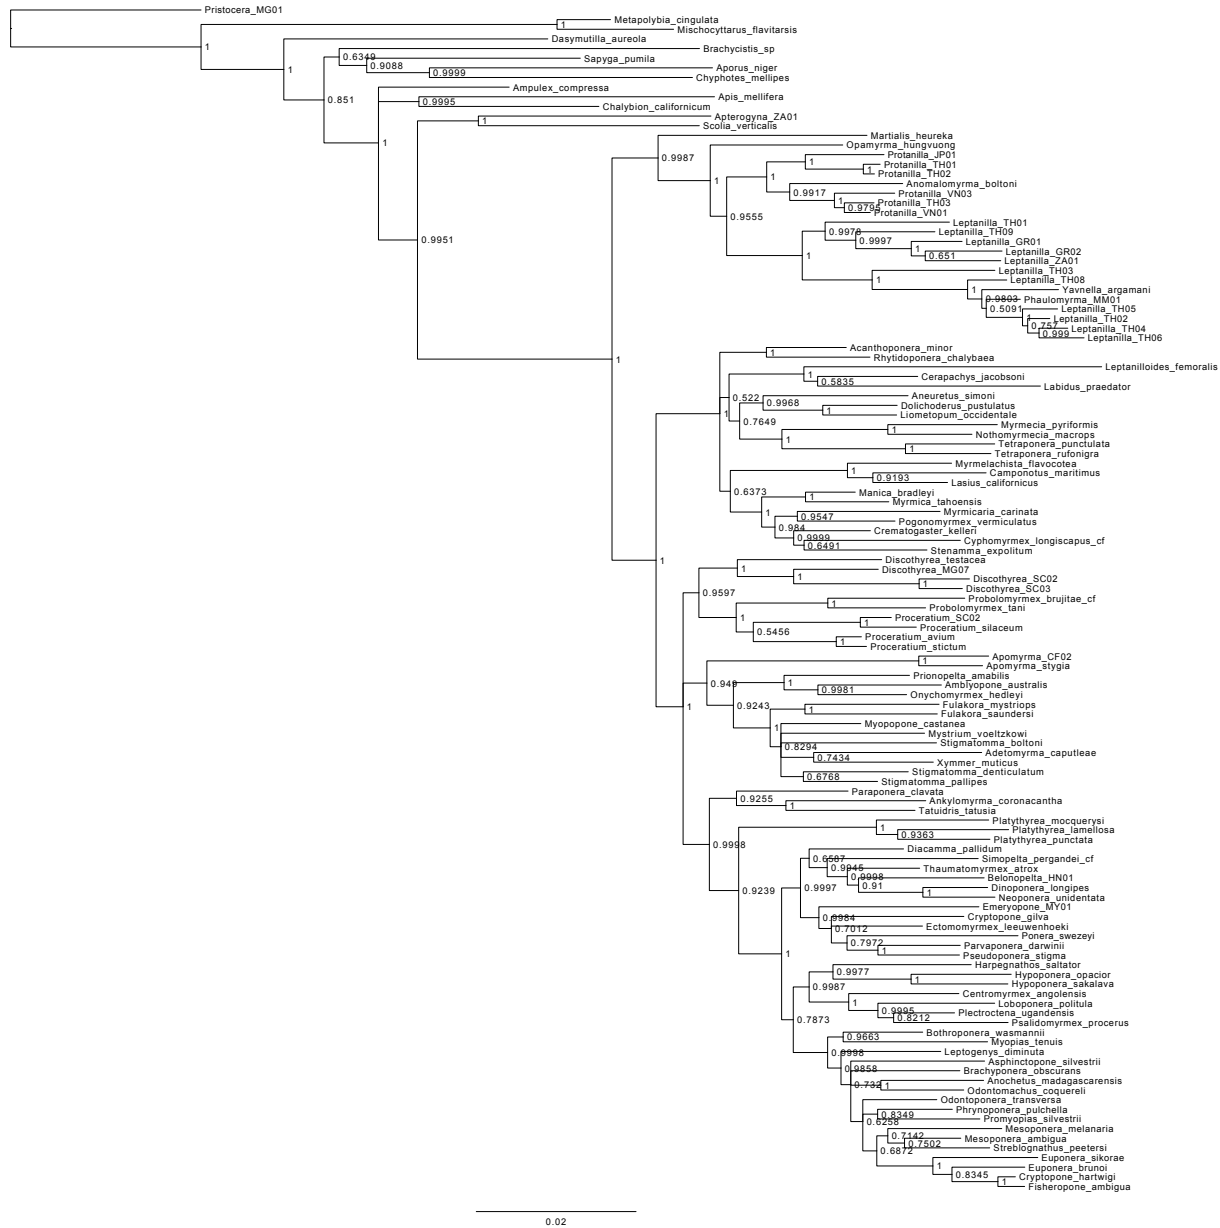

Supplementary Figure 14: Bayesian consensus tree inferred under k-means partitioning strategy for compositionally homogeneous dataset.

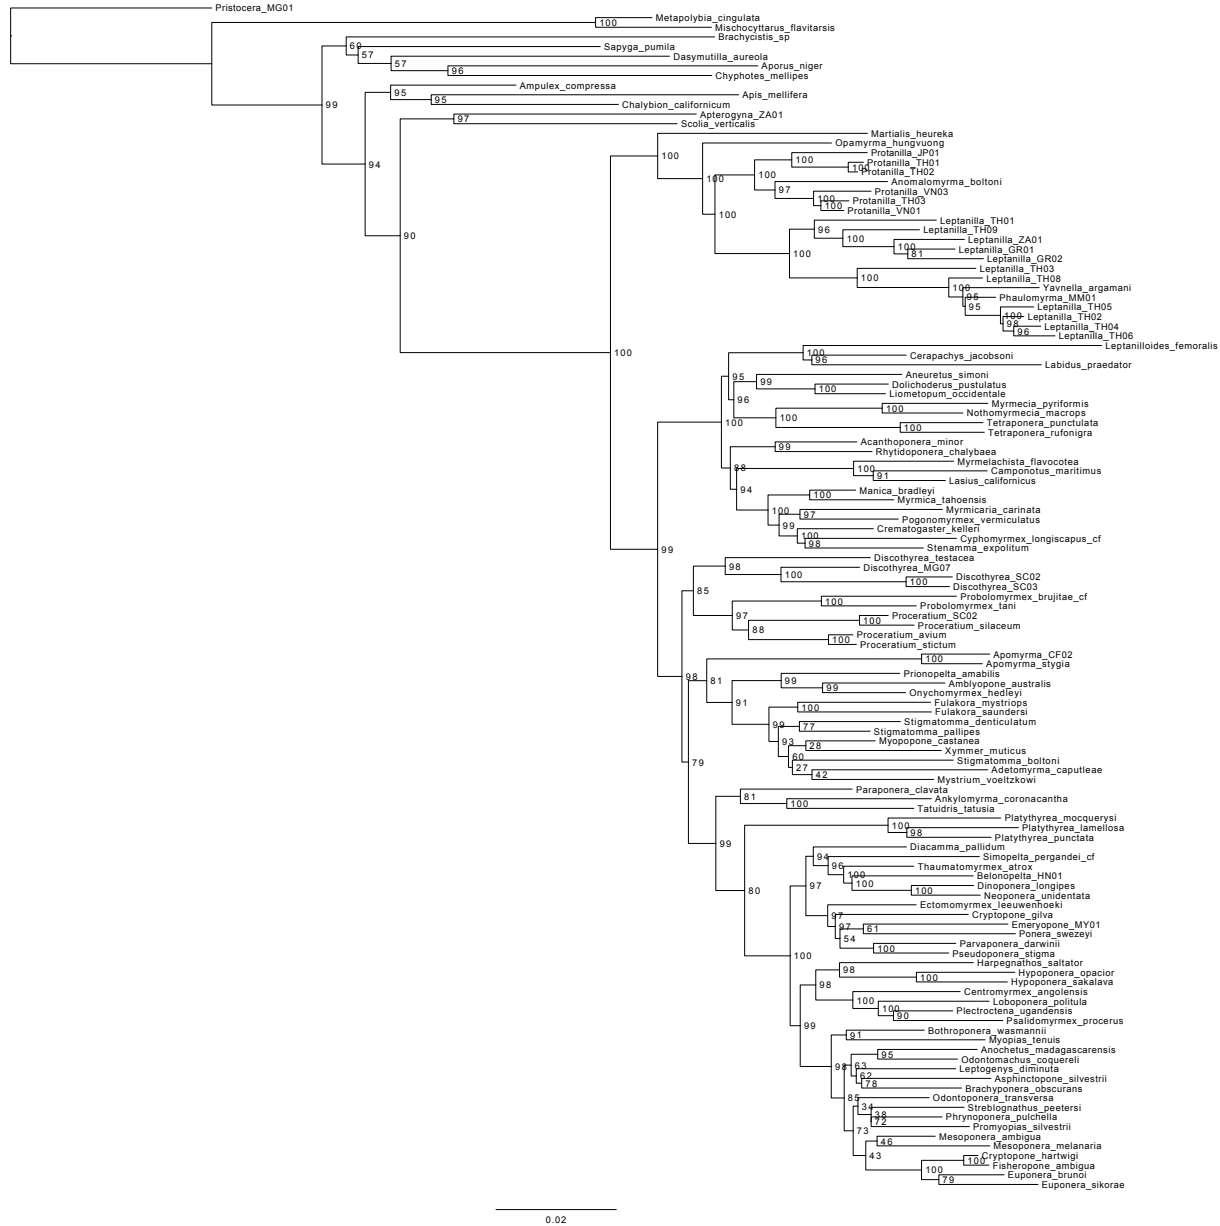

Supplementary Figure 15: Maximum-likelihood tree inferred under greedy partitioning strategy for compositionally homogeneous dataset.

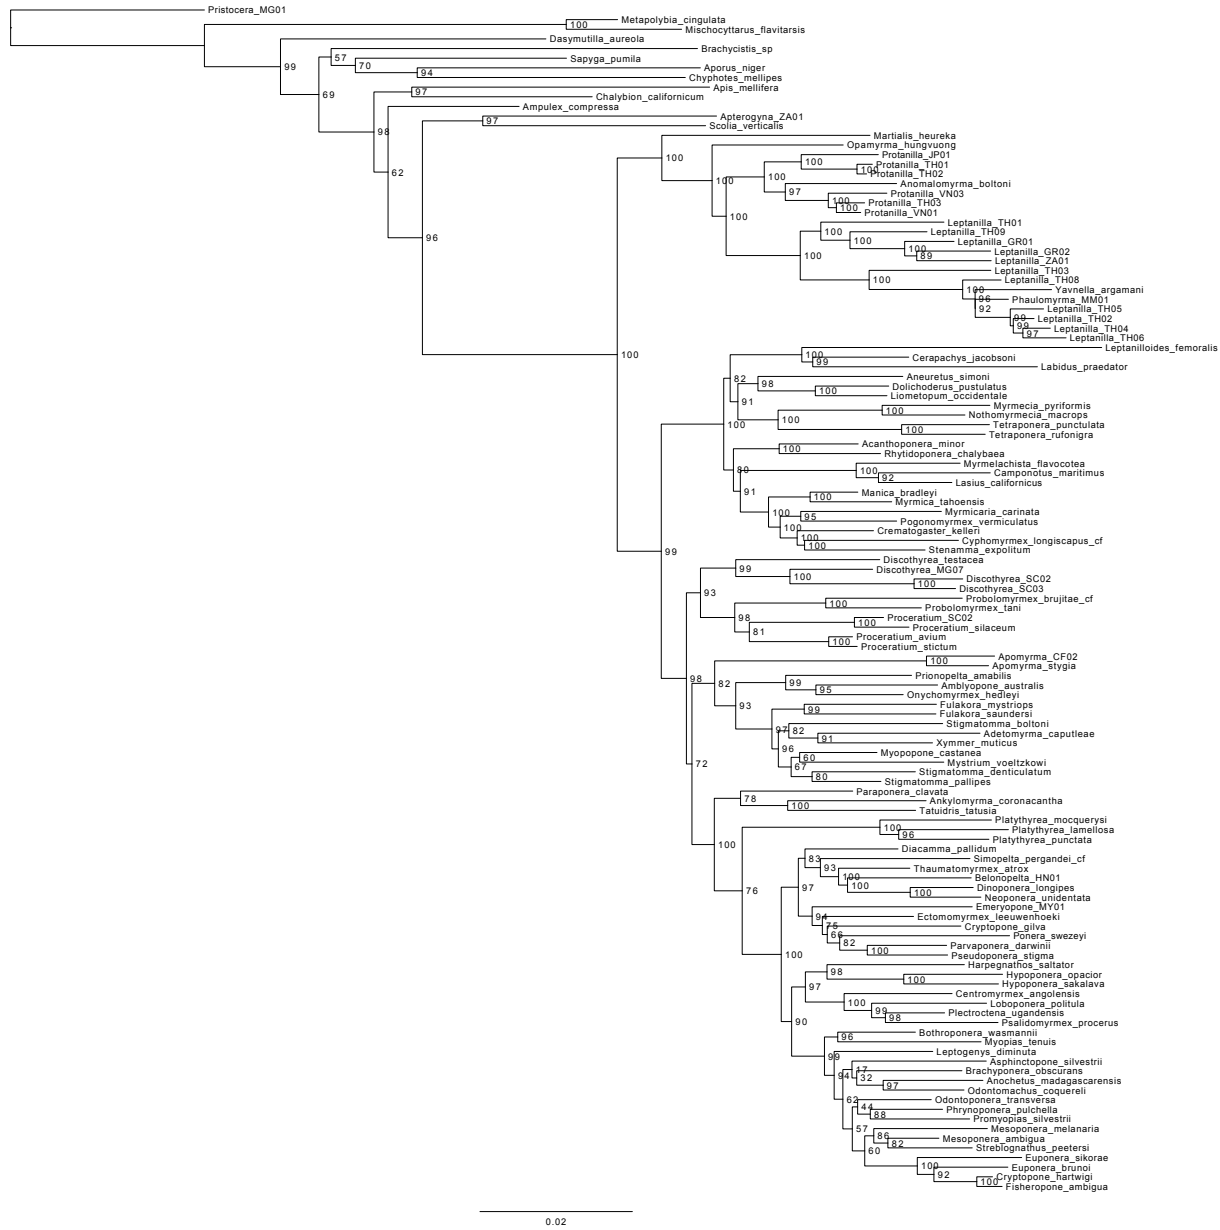

Supplementary Figure 16: Maximum-likelihood tree inferred under k-means partitioning strategy for compositionally homogeneous dataset.



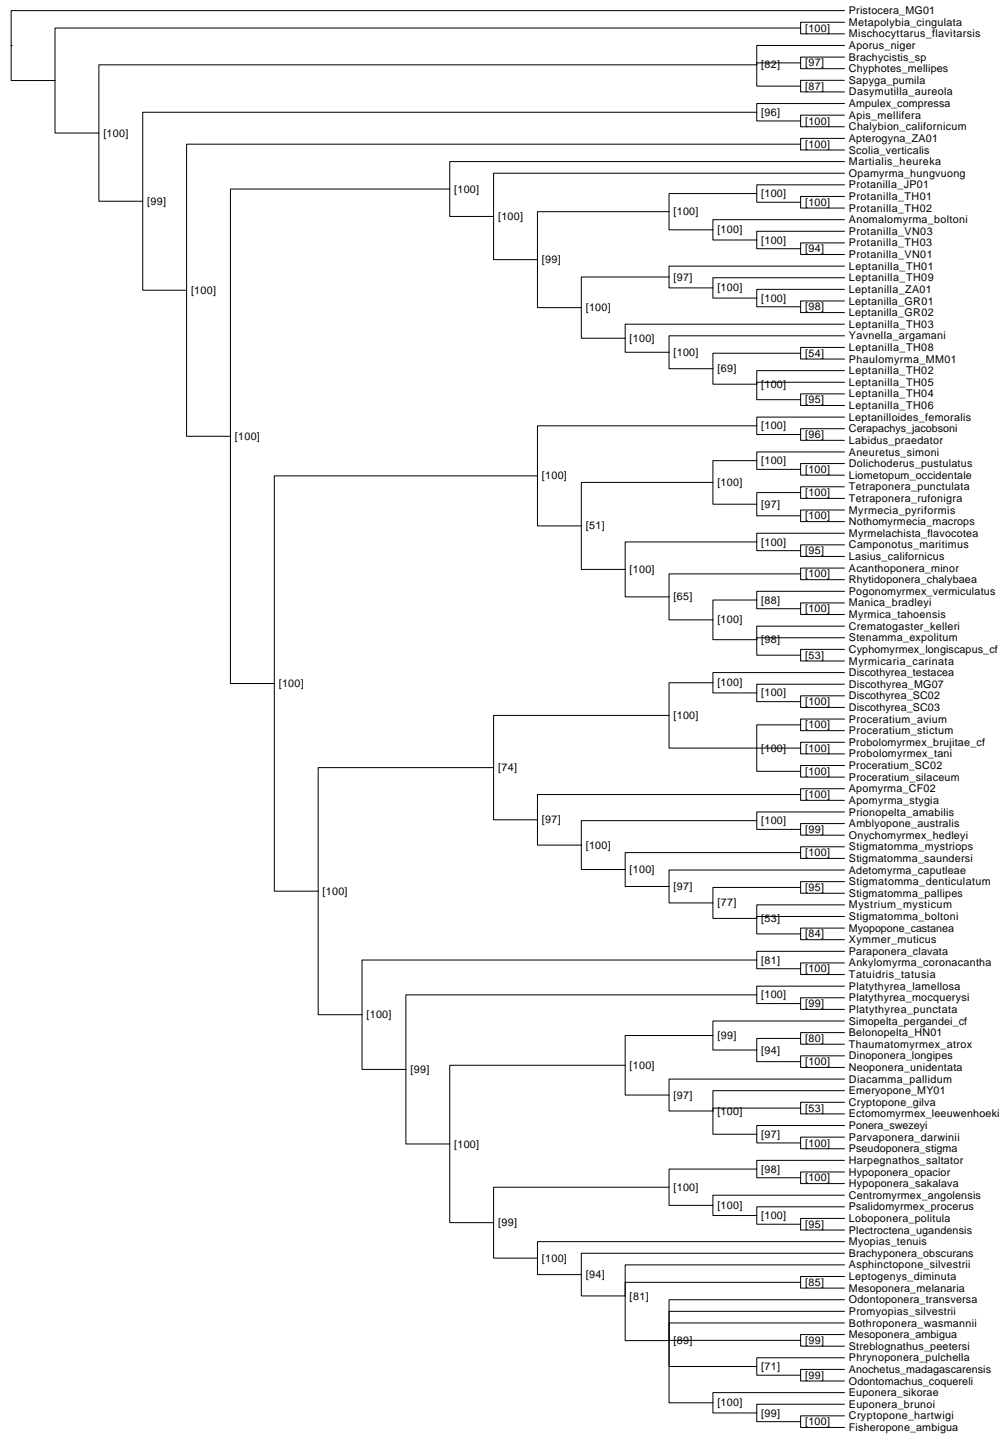

Supplementary Figure 17: Majority-rule consensus of maximum-likelihood trees inferred from 100 simulated alignments imitating first codon positions.

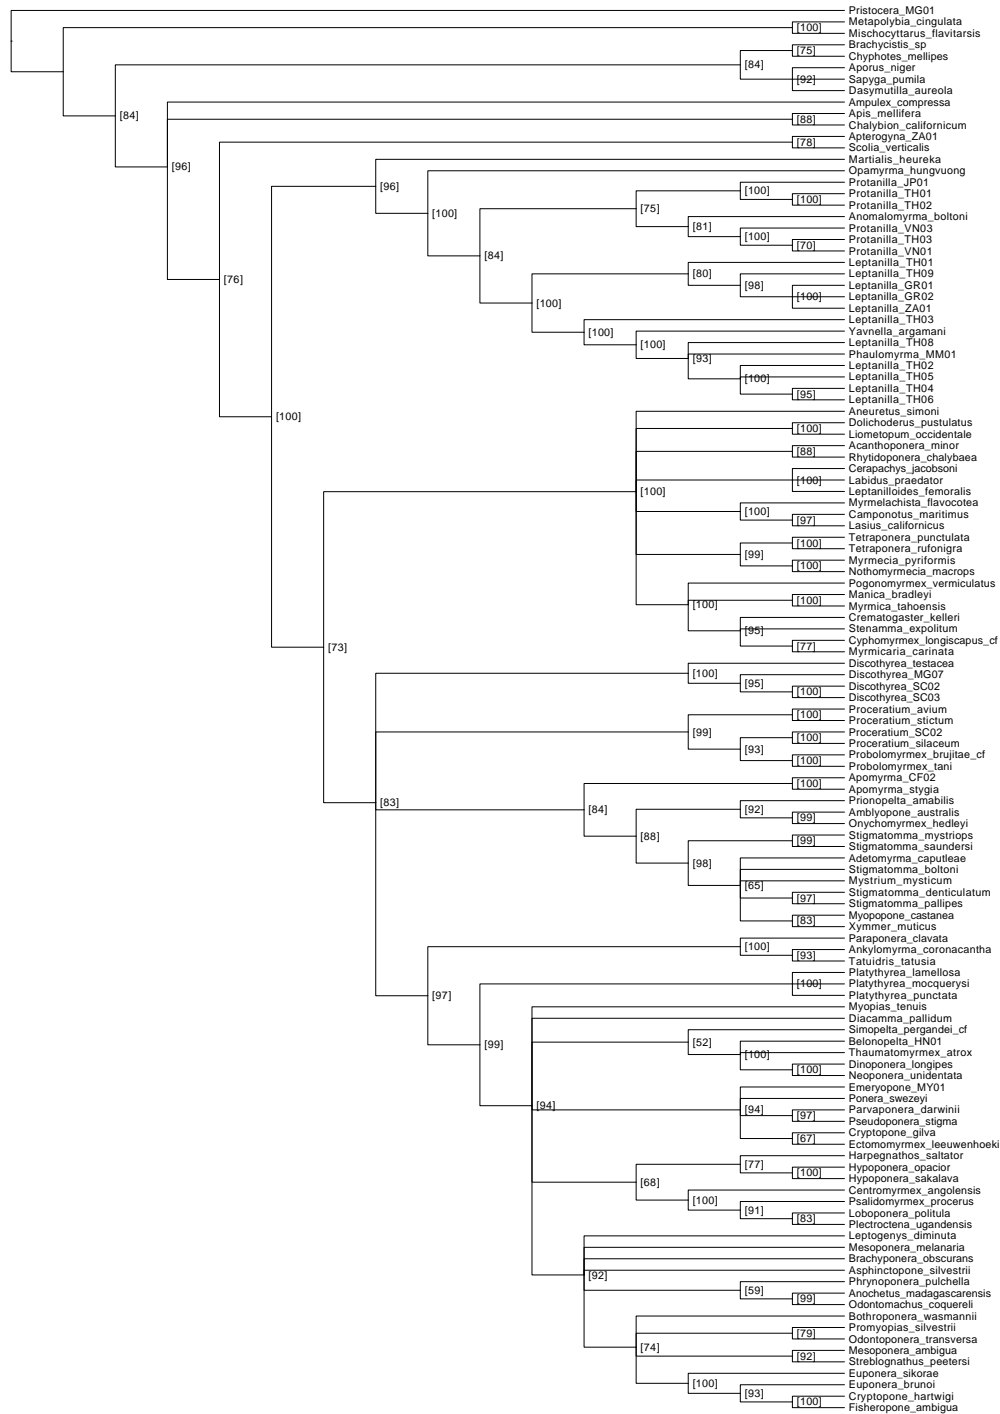

Supplementary Figure 18: Majority-rule consensus of maximum-likelihood trees inferred from 100 simulated alignments imitating second codon positions.

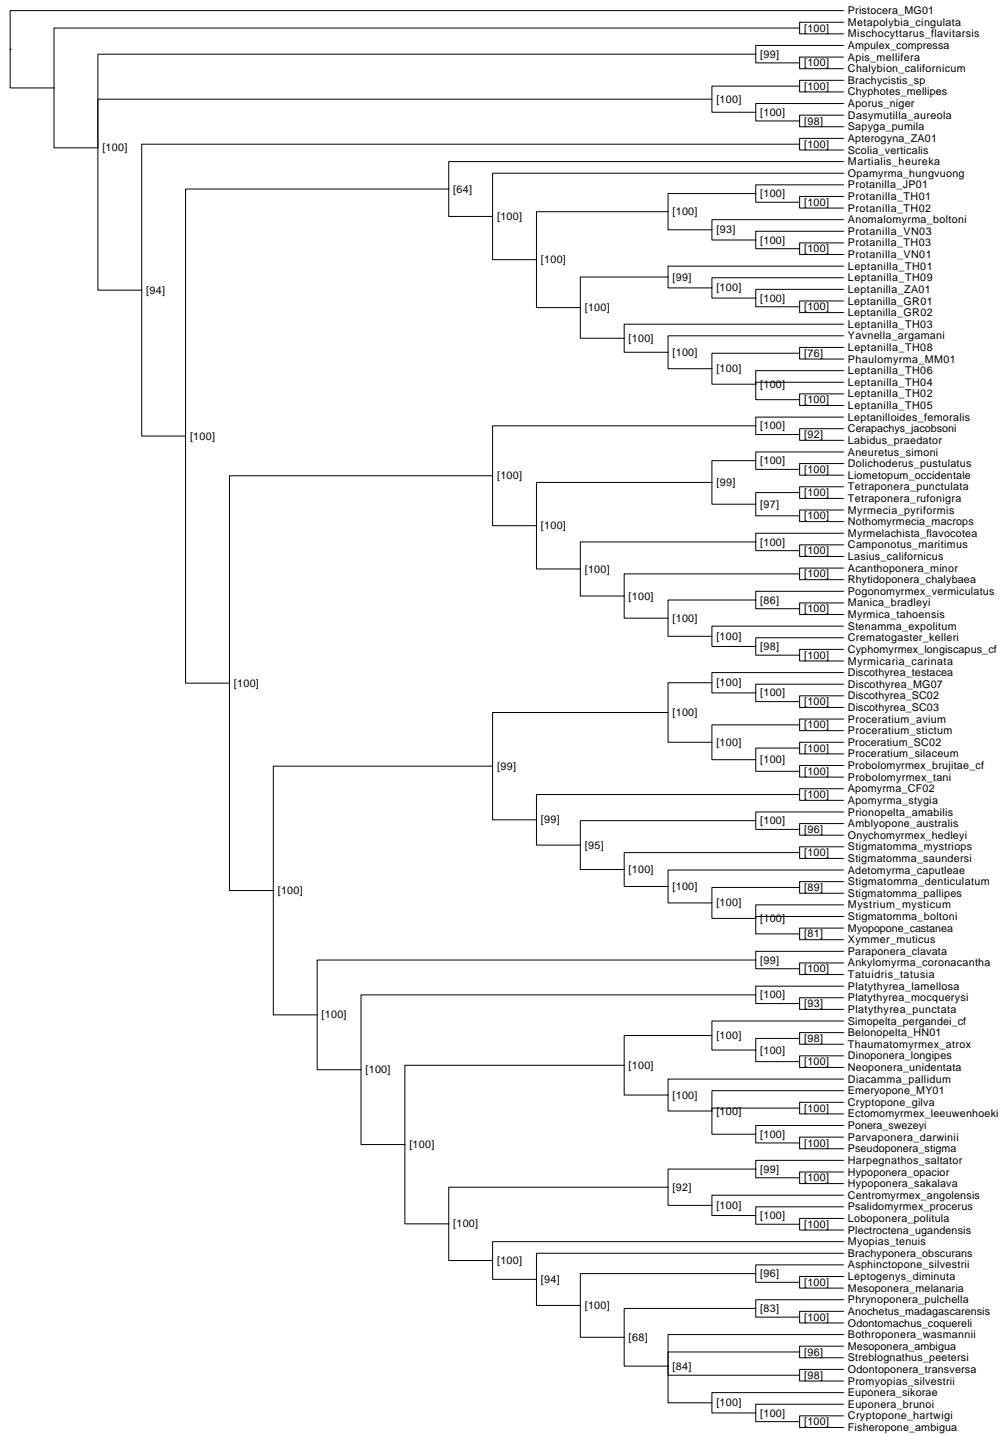

Supplementary Figure 19: Majority-rule consensus of maximum-likelihood trees inferred from 100 simulated alignments imitating third codon positions.

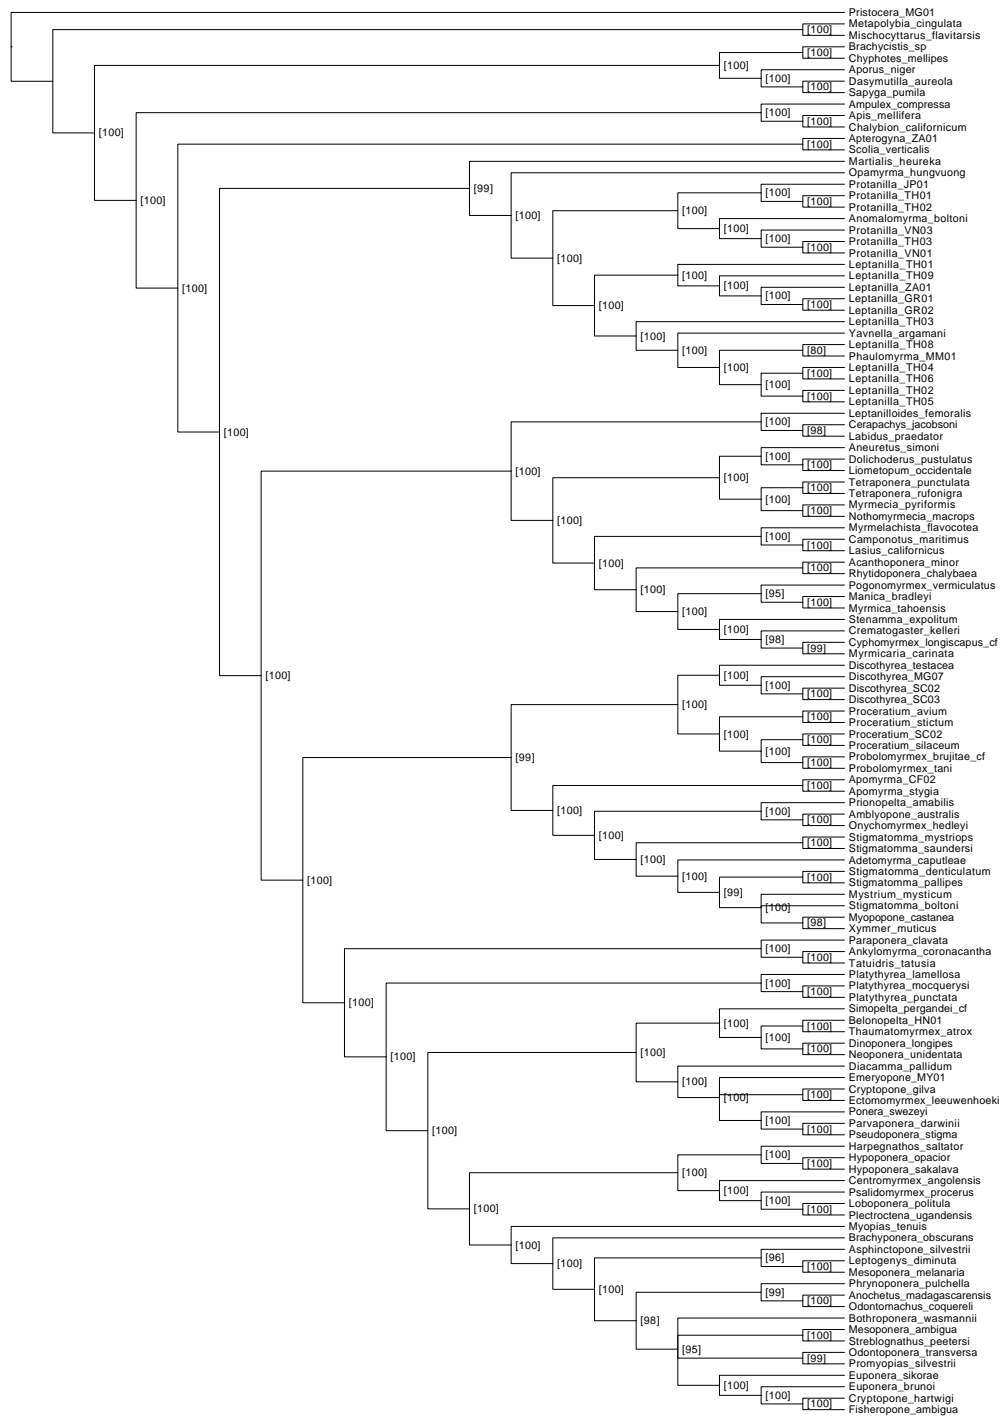

Supplementary Figure 20: Majority-rule consensus of maximum-likelihood trees inferred from 100 simulated alignments imitating first, second, and third codon positions combined.

Supplementary Table 1: Taxon properties in the full data set. AT and GC contents are expressed as proportions and nucleotide and gap columns contain character counts. Alignment has 7,451 sites total.

| Taxon name                        | AT content | GC content | A    | C    | G    | T    | Gap |
|-----------------------------------|------------|------------|------|------|------|------|-----|
| <i>Acanthoponera minor</i>        | 0.446      | 0.554      | 1792 | 2043 | 1967 | 1431 | 217 |
| <i>Adetomyrma caputleae</i>       | 0.455      | 0.545      | 1822 | 2005 | 1933 | 1460 | 231 |
| <i>Amblyopone australis</i>       | 0.452      | 0.548      | 1819 | 2008 | 1954 | 1448 | 222 |
| <i>Ampulex compressa</i>          | 0.440      | 0.560      | 1790 | 2074 | 1958 | 1380 | 249 |
| <i>Aneuretus simoni</i>           | 0.424      | 0.576      | 1711 | 2112 | 2054 | 1360 | 214 |
| <i>Ankylomyrma coronacantha</i>   | 0.463      | 0.537      | 1839 | 1939 | 1943 | 1511 | 219 |
| <i>Anochetus madagascarensis</i>  | 0.449      | 0.551      | 1833 | 2041 | 1949 | 1421 | 207 |
| <i>Anomalomyrma boltoni</i>       | 0.514      | 0.486      | 2023 | 1745 | 1765 | 1696 | 222 |
| <i>Apis mellifera</i>             | 0.491      | 0.509      | 1956 | 1813 | 1865 | 1590 | 225 |
| <i>Apomyrma CF02</i>              | 0.483      | 0.517      | 1917 | 1883 | 1857 | 1575 | 219 |
| <i>Apomyrma stygia</i>            | 0.478      | 0.522      | 1904 | 1906 | 1865 | 1553 | 223 |
| <i>Aporus niger</i>               | 0.436      | 0.564      | 1756 | 2060 | 2012 | 1397 | 226 |
| <i>Apterogyna ZA01</i>            | 0.438      | 0.562      | 1739 | 2025 | 2020 | 1413 | 254 |
| <i>Asphinctopone silvestrii</i>   | 0.447      | 0.553      | 1801 | 2028 | 1976 | 1433 | 213 |
| <i>Belonopelta HN01</i>           | 0.416      | 0.584      | 1686 | 2158 | 2072 | 1324 | 205 |
| <i>Bothroponera wasmannii</i>     | 0.453      | 0.547      | 1833 | 2011 | 1944 | 1447 | 216 |
| <i>Brachycystis sp</i>            | 0.502      | 0.498      | 2006 | 1781 | 1806 | 1614 | 204 |
| <i>Brachyponera obscurans</i>     | 0.438      | 0.562      | 1781 | 2089 | 1983 | 1390 | 207 |
| <i>Camponotus maritimus</i>       | 0.459      | 0.541      | 1823 | 1975 | 1925 | 1492 | 236 |
| <i>Centromyrmex angolensis</i>    | 0.443      | 0.557      | 1773 | 2014 | 1998 | 1424 | 213 |
| <i>Cerapachys jacobsoni</i>       | 0.452      | 0.548      | 1807 | 2002 | 1958 | 1464 | 220 |
| <i>Chalybion californicum</i>     | 0.428      | 0.572      | 1753 | 2121 | 2015 | 1342 | 220 |
| <i>Chyphotes mellipes</i>         | 0.452      | 0.548      | 1833 | 2021 | 1937 | 1428 | 232 |
| <i>Crematogaster kelleri</i>      | 0.464      | 0.536      | 1843 | 1954 | 1923 | 1508 | 223 |
| <i>Cryptopone gilva</i>           | 0.436      | 0.564      | 1766 | 2073 | 2013 | 1387 | 212 |
| <i>Cryptopone hartwigi</i>        | 0.443      | 0.557      | 1791 | 2049 | 1968 | 1410 | 216 |
| <i>Cyphomyrmex longiscapus cf</i> | 0.469      | 0.531      | 1866 | 1934 | 1907 | 1530 | 214 |
| <i>Dasymutilla aureola</i>        | 0.488      | 0.512      | 1965 | 1839 | 1854 | 1560 | 233 |
| <i>Diacamma pallidum</i>          | 0.446      | 0.554      | 1801 | 2031 | 1982 | 1429 | 208 |
| <i>Dinoponera longipes</i>        | 0.429      | 0.571      | 1723 | 2075 | 2051 | 1383 | 213 |
| <i>Discothyrea MG07</i>           | 0.459      | 0.541      | 1856 | 1998 | 1914 | 1465 | 218 |
| <i>Discothyrea SC02</i>           | 0.446      | 0.554      | 1802 | 2020 | 1988 | 1421 | 220 |
| <i>Discothyrea SC03</i>           | 0.454      | 0.546      | 1835 | 2001 | 1947 | 1448 | 219 |
| <i>Discothyrea testacea</i>       | 0.424      | 0.576      | 1737 | 2126 | 2048 | 1332 | 208 |
| <i>Dolichoderus pustulatus</i>    | 0.456      | 0.544      | 1807 | 1982 | 1954 | 1488 | 217 |
| <i>Ectomomyrmex leeuwenhoekii</i> | 0.436      | 0.564      | 1764 | 2082 | 1999 | 1387 | 219 |
| <i>Emeryopone MY01</i>            | 0.428      | 0.572      | 1748 | 2116 | 2029 | 1359 | 199 |
| <i>Euponera brunoi</i>            | 0.441      | 0.559      | 1784 | 2065 | 1979 | 1410 | 207 |
| <i>Euponera sikorae</i>           | 0.444      | 0.556      | 1797 | 2057 | 1966 | 1415 | 210 |
| <i>Fisheropone ambigua</i>        | 0.444      | 0.556      | 1803 | 2054 | 1968 | 1413 | 213 |
| <i>Fulakora mystriops</i>         | 0.491      | 0.509      | 1921 | 1824 | 1843 | 1620 | 243 |
| <i>Fulakora saundersi</i>         | 0.454      | 0.546      | 1824 | 2002 | 1951 | 1467 | 207 |
| <i>Harpegnathos saltator</i>      | 0.451      | 0.549      | 1815 | 2002 | 1973 | 1451 | 210 |
| <i>Hypoconera opacior</i>         | 0.453      | 0.547      | 1799 | 1979 | 1978 | 1476 | 219 |
| <i>Hypoconera sakalava</i>        | 0.450      | 0.550      | 1808 | 2006 | 1967 | 1445 | 219 |
| <i>Labidus praedator</i>          | 0.463      | 0.537      | 1823 | 1951 | 1932 | 1525 | 219 |
| <i>Lasius californicus</i>        | 0.452      | 0.548      | 1791 | 2012 | 1947 | 1478 | 223 |
| <i>Leptanilla GR01</i>            | 0.528      | 0.472      | 2064 | 1698 | 1709 | 1741 | 239 |
| <i>Leptanilla GR02</i>            | 0.529      | 0.471      | 2074 | 1692 | 1707 | 1740 | 238 |
| <i>Leptanilla TH01</i>            | 0.515      | 0.485      | 2011 | 1732 | 1761 | 1704 | 243 |
| <i>Leptanilla TH02</i>            | 0.506      | 0.494      | 1989 | 1775 | 1788 | 1659 | 240 |
| <i>Leptanilla TH03</i>            | 0.512      | 0.488      | 2014 | 1742 | 1782 | 1684 | 229 |
| <i>Leptanilla TH04</i>            | 0.505      | 0.495      | 1990 | 1783 | 1786 | 1652 | 240 |
| <i>Leptanilla TH05</i>            | 0.508      | 0.492      | 1985 | 1757 | 1791 | 1679 | 239 |
| <i>Leptanilla TH06</i>            | 0.504      | 0.496      | 1987 | 1786 | 1791 | 1650 | 237 |
| <i>Leptanilla TH08</i>            | 0.506      | 0.494      | 1990 | 1779 | 1789 | 1663 | 230 |
| <i>Leptanilla TH09</i>            | 0.532      | 0.468      | 2064 | 1661 | 1716 | 1776 | 234 |
| <i>Leptanilla ZA01</i>            | 0.533      | 0.467      | 2079 | 1678 | 1689 | 1769 | 236 |
| <i>Leptanilloides femoralis</i>   | 0.424      | 0.576      | 1730 | 2146 | 2021 | 1343 | 211 |
| <i>Leptogenys diminuta</i>        | 0.454      | 0.546      | 1811 | 1997 | 1953 | 1480 | 210 |
| <i>Liometopum occidentale</i>     | 0.442      | 0.558      | 1763 | 2043 | 1988 | 1432 | 225 |
| <i>Loboponera politula</i>        | 0.431      | 0.569      | 1741 | 2078 | 2037 | 1379 | 216 |

Supplementary Table 1: Continued. Taxon properties in the full data set. AT and GC contents are expressed as proportions and nucleotide and gap columns contain character counts. Alignment has 7,451 sites total.

| Taxon name                        | AT content | GC content | A    | C    | G    | T    | Gap |
|-----------------------------------|------------|------------|------|------|------|------|-----|
| <i>Manica bradleyi</i>            | 0.440      | 0.560      | 1766 | 2060 | 1990 | 1415 | 219 |
| <i>Martialis heureka</i>          | 0.466      | 0.534      | 1849 | 1960 | 1901 | 1520 | 221 |
| <i>Mesoponera ambigua</i>         | 0.444      | 0.556      | 1792 | 2047 | 1973 | 1420 | 219 |
| <i>Mesoponera melanaria</i>       | 0.455      | 0.545      | 1846 | 2013 | 1924 | 1440 | 222 |
| <i>Metapolybia cingulata</i>      | 0.516      | 0.484      | 2022 | 1781 | 1745 | 1738 | 165 |
| <i>Mischocyttarus flavitarsis</i> | 0.530      | 0.470      | 2095 | 1718 | 1701 | 1757 | 180 |
| <i>Myopias tenuis</i>             | 0.421      | 0.579      | 1703 | 2138 | 2055 | 1340 | 209 |
| <i>Myopone castanea</i>           | 0.471      | 0.529      | 1877 | 1935 | 1883 | 1525 | 231 |
| <i>Myrmecia pyriiformis</i>       | 0.464      | 0.536      | 1851 | 1971 | 1902 | 1500 | 227 |
| <i>Myrmelachista flavocotea</i>   | 0.451      | 0.549      | 1784 | 2001 | 1961 | 1474 | 231 |
| <i>Myrmica tahoensis</i>          | 0.438      | 0.562      | 1762 | 2062 | 1997 | 1406 | 223 |
| <i>Myrmecaria carinata</i>        | 0.457      | 0.543      | 1821 | 1986 | 1942 | 1483 | 219 |
| <i>Mystrium voeltzkowi</i>        | 0.476      | 0.524      | 1902 | 1915 | 1865 | 1535 | 234 |
| <i>Neoponera unidentata</i>       | 0.443      | 0.557      | 1787 | 2042 | 1988 | 1420 | 199 |
| <i>Nothomyrmecia macrops</i>      | 0.451      | 0.549      | 1811 | 2035 | 1935 | 1446 | 224 |
| <i>Odontomachus coquereli</i>     | 0.445      | 0.555      | 1787 | 2029 | 1989 | 1436 | 204 |
| <i>Odontoponera transversa</i>    | 0.456      | 0.544      | 1829 | 1989 | 1946 | 1464 | 216 |
| <i>Onychomyrmex hedleyi</i>       | 0.463      | 0.537      | 1850 | 1961 | 1923 | 1495 | 222 |
| <i>Opamyra hungvuong</i>          | 0.473      | 0.527      | 1887 | 1935 | 1874 | 1535 | 220 |
| <i>Paraponera clavata</i>         | 0.472      | 0.528      | 1873 | 1922 | 1896 | 1538 | 222 |
| <i>Parvaponera darwini</i>        | 0.416      | 0.584      | 1706 | 2173 | 2056 | 1308 | 208 |
| <i>Phaulomyrma MM01</i>           | 0.507      | 0.493      | 2000 | 1775 | 1781 | 1661 | 234 |
| <i>Phrynoponera pulchella</i>     | 0.440      | 0.560      | 1783 | 2062 | 1992 | 1406 | 207 |
| <i>Platythyrea lamellosa</i>      | 0.460      | 0.540      | 1816 | 1975 | 1934 | 1516 | 210 |
| <i>Platythyrea mocquersyi</i>     | 0.443      | 0.557      | 1792 | 2053 | 1977 | 1418 | 211 |
| <i>Platythyrea punctata</i>       | 0.466      | 0.534      | 1837 | 1968 | 1896 | 1530 | 220 |
| <i>Plectroctena ugandensis</i>    | 0.445      | 0.555      | 1791 | 2025 | 1986 | 1426 | 216 |
| <i>Pogonomyrmex vermiculatus</i>  | 0.465      | 0.535      | 1857 | 1963 | 1903 | 1507 | 219 |
| <i>Ponera swezeyi</i>             | 0.440      | 0.560      | 1766 | 2049 | 2007 | 1416 | 213 |
| <i>Prionopelta amabilis</i>       | 0.481      | 0.519      | 1903 | 1894 | 1857 | 1569 | 228 |
| <i>Pristocera MG01</i>            | 0.468      | 0.532      | 1863 | 1923 | 1907 | 1512 | 228 |
| <i>Probolomyrmex brujitae</i> cf  | 0.413      | 0.587      | 1673 | 2151 | 2094 | 1309 | 224 |
| <i>Probolomyrmex tani</i>         | 0.444      | 0.556      | 1777 | 2034 | 1979 | 1427 | 234 |
| <i>Proceratium avium</i>          | 0.443      | 0.557      | 1787 | 2041 | 1979 | 1412 | 215 |
| <i>Proceratium SC02</i>           | 0.461      | 0.539      | 1836 | 1957 | 1941 | 1501 | 216 |
| <i>Proceratium silaceum</i>       | 0.458      | 0.542      | 1834 | 1968 | 1950 | 1483 | 216 |
| <i>Proceratium stictum</i>        | 0.447      | 0.553      | 1794 | 2024 | 1971 | 1430 | 215 |
| <i>Promyopias silvestrii</i>      | 0.457      | 0.543      | 1839 | 1985 | 1923 | 1456 | 219 |
| <i>Protanilla JP01</i>            | 0.499      | 0.501      | 1964 | 1817 | 1798 | 1643 | 229 |
| <i>Protanilla TH01</i>            | 0.517      | 0.483      | 2038 | 1768 | 1718 | 1699 | 228 |
| <i>Protanilla TH02</i>            | 0.518      | 0.482      | 2037 | 1759 | 1724 | 1703 | 228 |
| <i>Protanilla TH03</i>            | 0.490      | 0.510      | 1946 | 1861 | 1836 | 1604 | 204 |
| <i>Protanilla VN01</i>            | 0.491      | 0.509      | 1941 | 1849 | 1836 | 1615 | 210 |
| <i>Protanilla VN03</i>            | 0.491      | 0.509      | 1943 | 1853 | 1832 | 1607 | 214 |
| <i>Psalidomyrmex procerus</i>     | 0.436      | 0.564      | 1776 | 2078 | 2005 | 1383 | 209 |
| <i>Pseudoponera stigma</i>        | 0.419      | 0.581      | 1704 | 2138 | 2066 | 1324 | 219 |
| <i>Rhytidoponera chalybaea</i>    | 0.452      | 0.548      | 1814 | 2005 | 1961 | 1458 | 213 |
| <i>Sapyga pumila</i>              | 0.407      | 0.593      | 1689 | 2193 | 2105 | 1257 | 205 |
| <i>Scolia verticalis</i>          | 0.484      | 0.516      | 1939 | 1894 | 1833 | 1554 | 231 |
| <i>Simopelta pergandei</i> cf     | 0.441      | 0.559      | 1777 | 2058 | 1998 | 1422 | 196 |
| <i>Stenamma expolium</i>          | 0.451      | 0.549      | 1787 | 1981 | 1979 | 1466 | 237 |
| <i>Stigmatomma boltoni</i>        | 0.474      | 0.526      | 1884 | 1926 | 1869 | 1535 | 237 |
| <i>Stigmatomma denticulatum</i>   | 0.454      | 0.546      | 1826 | 2007 | 1938 | 1455 | 225 |
| <i>Stigmatomma pallipes</i>       | 0.456      | 0.544      | 1833 | 1997 | 1930 | 1460 | 231 |
| <i>Streblognathus peetersi</i>    | 0.438      | 0.562      | 1768 | 2074 | 1997 | 1399 | 213 |
| <i>Tatuidris tatusia</i>          | 0.478      | 0.522      | 1886 | 1888 | 1879 | 1559 | 239 |
| <i>Tetraponera punctulata</i>     | 0.434      | 0.566      | 1729 | 2064 | 2017 | 1401 | 240 |
| <i>Tetraponera rufonigra</i>      | 0.448      | 0.552      | 1788 | 2021 | 1961 | 1440 | 241 |
| <i>Thaumatomyrmex atrox</i>       | 0.438      | 0.562      | 1752 | 2054 | 2010 | 1415 | 214 |
| <i>Xymmer muticus</i>             | 0.472      | 0.528      | 1871 | 1925 | 1891 | 1538 | 225 |
| <i>Yavnella argamani</i>          | 0.511      | 0.489      | 1993 | 1754 | 1775 | 1688 | 241 |

Supplementary Table 2: Results of compositional homogeneity tests for all data partitions. P-values below 0.05 considered significant violation of homogeneity assumption.

| Partition      | Corrected test p-value | Chi-squared p-value |
|----------------|------------------------|---------------------|
| Full data set  | 0.000                  | 0.000               |
| 28S            | 0.000                  | 1.000               |
| abdA           | 0.000                  | 0.990               |
| abdA 1st pos   | 0.905                  | 1.000               |
| abdA 2nd pos   | 0.262                  | 1.000               |
| abdA 3rd pos   | 0.000                  | 0.000               |
| argK           | 0.000                  | 0.000               |
| argK 1st pos   | 0.698                  | 1.000               |
| argK 2nd pos   | 0.987                  | 1.000               |
| argK 3rd pos   | 0.000                  | 0.000               |
| Antp           | 0.000                  | 0.000               |
| Antp 1st pos   | 0.847                  | 1.000               |
| Antp 2nd pos   | 0.520                  | 1.000               |
| Antp 3rd pos   | 0.000                  | 0.000               |
| EF1aF2         | 0.000                  | 0.000               |
| EF1aF2 1st pos | 1.000                  | 1.000               |
| EF1aF2 2nd pos | 0.555                  | 1.000               |
| EF1aF2 3rd pos | 0.000                  | 0.000               |
| LW Rh          | 0.000                  | 0.000               |
| LW Rh 1st pos  | 1.000                  | 1.000               |
| LW Rh 2nd pos  | 0.926                  | 1.000               |
| LW Rh 3rd pos  | 0.000                  | 0.000               |
| NaK            | 0.000                  | 0.025               |
| NaK 1st pos    | 0.558                  | 1.000               |
| NaK 2nd pos    | 0.460                  | 1.000               |
| NaK 3rd pos    | 0.000                  | 0.000               |
| POLD1          | 0.000                  | 0.000               |
| POLD1 1st pos  | 0.004                  | 1.000               |
| POLD1 2nd pos  | 0.766                  | 1.000               |
| POLD1 3rd pos  | 0.000                  | 0.000               |
| Top 1          | 0.000                  | 0.000               |
| Top 1 1st pos  | 0.106                  | 1.000               |
| Top 1 2nd pos  | 0.964                  | 1.000               |
| Top 1 3rd pos  | 0.000                  | 0.000               |
| Ubx            | 0.000                  | 0.009               |
| Ubx 1st pos    | 0.038                  | 1.000               |
| Ubx 2nd pos    | 0.202                  | 1.000               |
| Ubx 3rd pos    | 0.000                  | 0.000               |
| Wg             | 0.000                  | 0.000               |
| Wg 1st pos     | 0.749                  | 1.000               |
| Wg 2nd pos     | 0.923                  | 1.000               |
| Wg 3rd pos     | 0.000                  | 0.000               |
| All 1st pos    | 0.028                  | 1.000               |
| All 2nd pos    | 1.000                  | 1.000               |
| All 3rd pos    | 0.000                  | 0.000               |

Supplementary Table 3: Calibration fossils used in divergence dating analysis.

| Fossil genus             | Fossil species             | Least inclusive clade (total group) | Least inclusive clade (total group) in this study                                                 | Deposit                        | Age   | References                                                                                                                                                                                                                                                                                                                                                                                                                                        | Notes                                                                                                                                                                                                                                                                |
|--------------------------|----------------------------|-------------------------------------|---------------------------------------------------------------------------------------------------|--------------------------------|-------|---------------------------------------------------------------------------------------------------------------------------------------------------------------------------------------------------------------------------------------------------------------------------------------------------------------------------------------------------------------------------------------------------------------------------------------------------|----------------------------------------------------------------------------------------------------------------------------------------------------------------------------------------------------------------------------------------------------------------------|
| <i>Prismomyces</i>       | <i>rasnitsyni</i>          | Prismomyces                         | <i>Prismomyces</i>                                                                                | Danish amber                   | 36    | <i>Prismomyces</i> in late Eocene Danish amber (Dusky and Radchenko, 2011).                                                                                                                                                                                                                                                                                                                                                                       | Node calibration in Ward et al. (2015): 42 (offset), 52 (median), 73 (95% quantile)                                                                                                                                                                                  |
| <i>Aphaenogaster</i>     | <i>antiqua</i>             | Aphaenogaster sensu stricto         | <i>Cromatogaster</i>                                                                              | Rovno amber                    | 36    | <i>Aphaenogaster antiqua</i> from Rovno amber (Dusky and Radchenko, 2011).<br>Four <i>Myrmica</i> species ( <i>longispina</i> , <i>rufis</i> , <i>intermedia</i> , <i>excavata</i> ) from Baltic amber (Dusky and Rasnitsyn, 2009), not definitely assignable to modern species groups, although similar to the pleistocene <i>riparis</i> -group (Radchenko et al., 2007).<br>Two species of <i>Cromatogaster</i> in Baltic amber (Dusky, 2009). | Node calibration in Ward et al. (2015): 42 (offset), 52 (median), 73 (95% quantile)                                                                                                                                                                                  |
| <i>Myrmica</i>           | <i>longispina</i>          | <i>Myrmica</i>                      | <i>Myrmica</i>                                                                                    | Baltic amber                   | 36    |                                                                                                                                                                                                                                                                                                                                                                                                                                                   | Node calibration in Ward et al. (2015): 42 (offset), 60 (median), 85 (95% quantile)                                                                                                                                                                                  |
| <i>Cromatogaster</i>     | <i>europaea</i>            | <i>Cromatogaster</i>                | <i>Rhytidoponera</i>                                                                              | Baltic amber                   | 36    |                                                                                                                                                                                                                                                                                                                                                                                                                                                   | Node calibration in Ward et al. (2015): 42 (offset), 60 (median), 85 (95% quantile)                                                                                                                                                                                  |
| <i>Kyomyrma</i>          | <i>negii</i>               | Formicine                           | <i>Myrmecolacina</i> plus <i>Camponotus</i> plus <i>Lasius</i>                                    | New Jersey amber               | 92    | <i>Kyomyrma</i> in New Jersey amber (Grimaldi and Agosti, 2000).                                                                                                                                                                                                                                                                                                                                                                                  | Node calibration in Ward et al. (2015): 92 (offset), 95 (median), 120 (95% quantile)                                                                                                                                                                                 |
| <i>Lasius</i>            | <i>glom</i>                | <i>Lasius</i>                       | <i>Lasius</i>                                                                                     | Kichusha Formation             | 46    | <i>Lasius glom</i> in Kichusha Formation (Lapolla and Greenwalt, 2015)                                                                                                                                                                                                                                                                                                                                                                            |                                                                                                                                                                                                                                                                      |
| <i>Oecophylla</i>        | <i>longiceps</i>           | Oecophylla                          | <i>Camponotus</i>                                                                                 | Grube Messel, Germany          | 47    | <i>Oecophylla longiceps</i> from Grube Messel, Darmstadt, Germany; middle Eocene, Lutetian (ca. 47 Ma) (Dusky et al., 2008).                                                                                                                                                                                                                                                                                                                      | Node calibration in Chomicz et al. (2015) of crown Pseudomyrmecinae with truncated normal prior, mean 55, sd 5; truncated at 55 Ma. Considered crown <i>Tetraponera</i> , given mandible structure (reduced teeth) and loss of ocelli.                               |
| <i>Tetraponera</i>       | sp. Oise                   | <i>Tetraponera</i>                  | <i>Tetraponera</i>                                                                                | Oise amber                     | 52    | Three species of <i>Tetraponera</i> in Oise amber (Ara et al. (2011); Ara pers. comm.).                                                                                                                                                                                                                                                                                                                                                           |                                                                                                                                                                                                                                                                      |
| <i>Tetraponera</i>       | <i>simplex</i>             | <i>Tetraponera</i> crown            | <i>Tetraponera punctulata</i>                                                                     | Baltic amber                   | 36    | <i>Tetraponera simplex</i> in Baltic amber (Dusky and Rasnitsyn, 2009), with some features of <i>T. nigra</i> group.                                                                                                                                                                                                                                                                                                                              |                                                                                                                                                                                                                                                                      |
| <i>Ypresiomyrma</i>      | <i>rebockae</i>            | Myrmecinae                          | <i>Myrmica</i> plus <i>Notomyrma</i>                                                              | Mo-Clay, Denmark               | 53.5  | <i>Ypresiomyrma rebockae</i> from Mo-Clay, Stollidkitt, Isle of Fur, Denmark; Eocene.                                                                                                                                                                                                                                                                                                                                                             |                                                                                                                                                                                                                                                                      |
| <i>Prionomyrmex</i>      | <i>janzeni</i>             | <i>Notomyrma</i>                    | <i>Notomyrma</i>                                                                                  | Baltic amber                   | 36    | Two species of <i>Prionomyrmex</i> in Baltic amber (Meyer, 1988; Baron Urban, 2000).                                                                                                                                                                                                                                                                                                                                                              |                                                                                                                                                                                                                                                                      |
| <i>Dolichoderus</i>      | <i>kolksi</i>              | <i>Dolichoderus</i>                 | <i>Dolichoderus</i>                                                                               | Green River Formation          | 51.5  | <i>Dolichoderus kolksi</i> from Green River Formation (Dusky and Rasnitsyn, 2003).                                                                                                                                                                                                                                                                                                                                                                | Second most abundant species of ant in Green River Formation.                                                                                                                                                                                                        |
| <i>Liometopum</i>        | <i>oligocenicum</i>        | <i>Liometopum</i>                   | <i>Liometopum</i>                                                                                 | Baltic amber                   | 36    | <i>Liometopum oligocenicum</i> in Baltic amber (Dusky, 1997), but rare (Dusky and Rasnitsyn, 2009).                                                                                                                                                                                                                                                                                                                                               | Node calibration in Ward et al. (2010) (same calibration for <i>Leptomyrma</i> and <i>Zyrasoma</i> ): 42 (offset), 54 (median), 70 (95% quantile); in Radchenko et al. (2016): 42, 59, 77.                                                                           |
| <i>Chronomyrmex</i>      | <i>medicinalensis</i>      | Dolichoderinae                      | <i>Dolichoderus</i> plus <i>Aneuretinae</i> plus <i>Dolichoderinae</i>                            | Canadian Grassy Lake amber     | 78    | <i>Chronomyrmex</i> in Grassy Lake amber (McKellar et al. (2013); Boudinot et al. (2016)).                                                                                                                                                                                                                                                                                                                                                        | Node calibration in Boudinot et al. (2016): 42 (offset), 95 (median), 110 (95% quantile).<br>Because of possible paraphyly of Aneuretinae we assume a conservative assignment to the total group of (Aneuretinae plus Dolichoderinae), i.e. crown Dolichoderomorpha. |
| <i>Aneuretillus</i>      | <i>deformis</i>            | Aneuretinae plus Dolichoderinae     | <i>Aneuretinae</i> plus <i>Dolichoderinae</i>                                                     | Sibbaldin amber                | 57.5  | <i>Aneuretillus deformis</i> from Sibbaldin amber (Dusky, 1988).                                                                                                                                                                                                                                                                                                                                                                                  |                                                                                                                                                                                                                                                                      |
| <i>Proceratophylax</i>   | <i>flavus</i>              | Dorylinae                           | <i>Ceratophylax</i> plus <i>Lepanilloides</i>                                                     | Baltic amber                   | 36    | Three species of <i>Proceratophylax</i> in Baltic amber (Dusky, 2009).                                                                                                                                                                                                                                                                                                                                                                            | Node calibration in (Hady et al., 2014): 42 (offset), 80 (median), 100 (95% quantile)                                                                                                                                                                                |
| <i>Platythyrea</i>       | <i>dluskyi</i>             | <i>Platythyrea</i>                  | <i>Platythyrea</i>                                                                                | Oise amber                     | 52    | <i>Platythyrea dluskyi</i> in Oise amber (Ara et al., 2011).                                                                                                                                                                                                                                                                                                                                                                                      | Different calibration (Baltic amber) in Ward et al. (2015).                                                                                                                                                                                                          |
| <i>Hypoponera</i>        | <i>antiva</i>              | <i>Hypoponera</i>                   | <i>Hypoponera</i>                                                                                 | Baltic amber                   | 36    | <i>Hypoponera antiva</i> in Baltic amber (Dusky, 1997; Dusky and Rasnitsyn, 2009).                                                                                                                                                                                                                                                                                                                                                                |                                                                                                                                                                                                                                                                      |
| <i>Odonotomachus</i>     | <i>paleomyrma</i>          | <i>Odonotomachus</i>                | <i>Odonotomachus</i>                                                                              | Burn, Czech Republic           | 18    | <i>Odonotomachus paleomyrma</i> from Burn, Czech Republic, Early Miocene (Badginton, [ca.20 Ma]) (Vajuppa et al., 2014).                                                                                                                                                                                                                                                                                                                          |                                                                                                                                                                                                                                                                      |
| <i>Anochetus</i>         | <i>lucidus</i>             | <i>Anochetus</i>                    | <i>Anochetus</i>                                                                                  | Dominican amber                | 17    | <i>Anochetus</i> in Dominican amber (Urban, 1980; Andreae, 1994; Muecke, 1991).                                                                                                                                                                                                                                                                                                                                                                   |                                                                                                                                                                                                                                                                      |
| <i>Poneria</i>           | <i>mayri</i>               | <i>Poneria</i>                      | <i>Poneria swazeyi</i>                                                                            | Baltic amber                   | 36    | <i>Dusky and Rasnitsyn (2009)</i> recognizes three <i>Poneria</i> species from Baltic amber.                                                                                                                                                                                                                                                                                                                                                      |                                                                                                                                                                                                                                                                      |
| <i>Stigmatomma</i>       | <i>grobshi</i>             | <i>Stigmatomma</i>                  | <i>Stigmatomma denticalanum</i> group                                                             | Baltic amber                   | 36    | <i>Stigmatomma grobshi</i> in Baltic amber, said to be member of <i>S. denticalanum</i> group (Dusky, 2009).                                                                                                                                                                                                                                                                                                                                      | Node calibration in Ward and Fisher (2016): 42 (offset), 55 (median), 80 (95% quantile)                                                                                                                                                                              |
| <i>Stigmatomma</i>       | <i>electrina</i>           | <i>Stigmatomma</i> (NMMAS clade)    | <i>Stigmatomma mystrops</i>                                                                       | Baltic amber                   | 36    | <i>Stigmatomma electrina</i> (male) in Baltic amber (Dusky, 2009).                                                                                                                                                                                                                                                                                                                                                                                |                                                                                                                                                                                                                                                                      |
| <i>Priopelta</i>         | sp. Dominican              | <i>Priopelta</i>                    | <i>Priopelta</i>                                                                                  | Dominican amber                | 17    | Undescribed <i>Priopelta</i> species from Dominican amber (Wilson, 2004).                                                                                                                                                                                                                                                                                                                                                                         | Node calibration in Ward and Fisher (2016): 15 (offset), 40 (median), 60 (95% quantile)                                                                                                                                                                              |
| <i>Bradoponera</i>       | <i>electrina</i>           | Proceratinae                        | <i>Dicobryza</i> plus <i>Proceratinae</i> plus <i>Proceratophylax</i> plus <i>Proceratophylax</i> | Baltic amber                   | 36    | Three species of <i>Bradoponera</i> in Baltic amber (Urban and Andreae, 2003)                                                                                                                                                                                                                                                                                                                                                                     |                                                                                                                                                                                                                                                                      |
| <i>Proceratium</i>       | <i>excenicum</i>           | <i>Proceratium</i>                  | <i>Proceratium</i>                                                                                | Baltic amber                   | 36    | <i>Proceratium excenicum</i> in Baltic amber (Dusky, 2009).                                                                                                                                                                                                                                                                                                                                                                                       |                                                                                                                                                                                                                                                                      |
| <i>Agroecomyrmex</i>     | <i>duisburgi</i>           | <i>Tandaris</i>                     | <i>Tandaris</i>                                                                                   | Baltic amber                   | 36    | <i>Agroecomyrmex duisburgi</i> (Agroecomyrmecinae) in Baltic amber (Wheeler, 1915; Dusky and Rasnitsyn, 2009).                                                                                                                                                                                                                                                                                                                                    | Node calibration in Ward et al. (2015): 42 (offset), 60 (median), 90 (95% quantile)                                                                                                                                                                                  |
| <i>Camelomecia</i>       | <i>janovitzii</i>          | Formicidae                          | Formicidae                                                                                        | Myanmar amber                  | 97    | (Barden and Grimaldi, 2016).                                                                                                                                                                                                                                                                                                                                                                                                                      |                                                                                                                                                                                                                                                                      |
| <i>Gerrontiformica</i>   | <i>cretacea</i>            | Formicidae                          | Formicidae                                                                                        | Charentese amber               | 99.5  | <i>Gerrontiformica cretacea</i> and <i>G. occidentalis</i> in Charentese amber (Perrichot et al., 2008; Perrichot, 2015; Barden and Grimaldi, 2016).                                                                                                                                                                                                                                                                                              | <i>Sphecomyrma</i> now considered a junior synonym (Barden and Grimaldi, 2016).                                                                                                                                                                                      |
| <i>Pompilopterus</i>     | <i>difficilis</i>          | Apodea                              | Apodea                                                                                            | Lulworth Formation, England    | 143   | <i>Pompilopterus difficilis</i> (Rasnitsyn and Jurembowski, 1998).                                                                                                                                                                                                                                                                                                                                                                                | Age range: 145.5 to 140.2 Ma.                                                                                                                                                                                                                                        |
| <i>Archiliphia</i>       | <i>rasnitsyni</i>          | Anthoboscinae                       | <i>Clypeotes</i>                                                                                  | Crato formation, Ceará, Brazil | 117.6 | <i>Archiliphia rasnitsyni</i> (1990). Date from fossilworks (midpoint of 122.46 to 112.6)                                                                                                                                                                                                                                                                                                                                                         | Said to be Anthoboscinae. Note that anthoboscines are Thymidae, not Tiphidae (sensu Pflüger et al. (2005)).                                                                                                                                                          |
| <i>Thanatophia</i>       | <i>nrx</i>                 | Tiphidae plus Thymidae              | <i>Clypeotes</i> plus <i>Brachicista</i>                                                          | Myanmar amber                  | 97    | <i>Engel et al. (2009)</i> . Date from fossilworks (midpoint of 99.7 to 94.3).                                                                                                                                                                                                                                                                                                                                                                    | Not definitively assigned to thymid or tiphid (s.s.) groups.                                                                                                                                                                                                         |
| <i>Eoarthopolosoma</i>   | <i>gorgyra</i>             | Rhopalosomatidae                    | <i>Mesochrysa</i> plus <i>Mesochrysa</i>                                                          | Myanmar amber                  | 97    | <i>Engel (2008)</i> . Date from fossilworks (midpoint of 99.7 to 94.3).                                                                                                                                                                                                                                                                                                                                                                           | <i>Engel (2008)</i> argues that this is a crown rhopalosomatid.                                                                                                                                                                                                      |
| <i>Mesarthropalosoma</i> | <i>cearae</i>              | Rhopalosomatidae                    | <i>Mesochrysa</i> plus <i>Mesochrysa</i>                                                          | Crato formation, Ceará, Brazil | 117.6 | <i>Daring and Sharkey (1990)</i> . Date from fossilworks (midpoint of 122.46 to 112.6).                                                                                                                                                                                                                                                                                                                                                           | <i>Mesarthropalosoma</i> likely a stem rhopalosomatid.                                                                                                                                                                                                               |
| <i>Palaegenia</i>        | <i>walkeri</i>             | Pepsinae                            | <i>Aprina</i>                                                                                     | Baltic amber                   | 36    | <i>Rodriguez et al. (2016)</i> . Note that these authors remove <i>Brachyopeltis</i> (Myanmar amber) from Pompilidae.                                                                                                                                                                                                                                                                                                                             |                                                                                                                                                                                                                                                                      |
| <i>Cretosiphya</i>       | <i>arctocretarichosoma</i> | Syrphidae                           | <i>Syrpha</i>                                                                                     | Myanmar amber                  | 97    | <i>Bennet and Engel (2005)</i> . Date from fossilworks (midpoint of 99.7 to 94.3).                                                                                                                                                                                                                                                                                                                                                                |                                                                                                                                                                                                                                                                      |
| <i>Priomatula</i>        | <i>conquillata</i>         | Myrmecidae                          | <i>Dasympyla</i>                                                                                  | Baltic amber                   | 36    | <i>Letts (1986)</i> , Brothers (1974).                                                                                                                                                                                                                                                                                                                                                                                                            |                                                                                                                                                                                                                                                                      |
| <i>Cretosola</i>         | <i>conquillata</i>         | Scollidae                           | <i>Scolla</i>                                                                                     | Barremian, Spain               | 127.7 | <i>Rasnitsyn and Martínez-Delgado (2000)</i> . Date from fossilworks (midpoint of 130.0 to 125.45).                                                                                                                                                                                                                                                                                                                                               | At least seven other species of <i>Cretosola</i> have been described, all from the Cretaceous.                                                                                                                                                                       |
| <i>Carridris</i>         | <i>bipariolata</i>         | Ampulicidae                         | <i>Ampulex</i>                                                                                    | Crato formation, Ceará, Brazil | 117.6 | <i>Oli (2004)</i> . Date from fossilworks (midpoint of 122.46 to 112.6)                                                                                                                                                                                                                                                                                                                                                                           |                                                                                                                                                                                                                                                                      |
| <i>Cretomplex</i>        | <i>gracilis</i>            | Ampulicidae                         | <i>Ampulex</i>                                                                                    | Myanmar amber                  | 97    | <i>Antropov (2000)</i> . Date from fossilworks (midpoint of 99.7 to 94.3).                                                                                                                                                                                                                                                                                                                                                                        |                                                                                                                                                                                                                                                                      |
| <i>Cretosiphonema</i>    | <i>familians</i>           | Pempilodinae                        | <i>Apis</i>                                                                                       | Myanmar amber                  | 97    | <i>Antropov (2000, 2011)</i> . Date from fossilworks (midpoint of 99.7 to 94.3).                                                                                                                                                                                                                                                                                                                                                                  | There are many other Cretaceous pempilodinae.                                                                                                                                                                                                                        |
| <i>Melittosphex</i>      | <i>burnensis</i>           | Anthophila                          | <i>Apis</i>                                                                                       | Myanmar amber                  | 97    | <i>Ponar and Danforth (2006)</i> , <i>Ponar (2009)</i> . Date from fossilworks (midpoint of 99.7 to 94.3).                                                                                                                                                                                                                                                                                                                                        |                                                                                                                                                                                                                                                                      |



Supplementary Table 4: Taxa included in the study with GenBank accession numbers and specimen voucher information. Detailed collection data for each species is available by searching for the specimen code on AntWeb ([www.antweb.org](http://www.antweb.org)).

| Taxon                               | Voucher       | 28S        | Wg         | AA         | LR         | P2         | ArgK       | Top1       | Ubs        | DP         | NK         | AP         |
|-------------------------------------|---------------|------------|------------|------------|------------|------------|------------|------------|------------|------------|------------|------------|
| <i>Acanthoponera minor</i>          | CASEN0039772  | EF012953   | EF013661   | EF013081   | EF013533   | EF013371   | KJ861140   | KJ861751   | KJ860480   | XXXXXXXXXX | XXXXXXXXXX | XXXXXXXXXX |
| <i>Adeltonomyia capillare</i>       | CASEN00491481 | EF012956   | EF013664   | EF013084   | EF013536   | EF013375   | KJ861140   | KJ861767   | KJ861730   | KJ861870   | KJ861947   | KJ861793   |
| <i>Amblyoponera australis</i>       | CASEN0106229  | KJ860056   | KJ861944   | KJ861331   | KJ861515   | KJ859868   | KJ861141   | KJ861752   | KJ860481   | KJ861871   | KJ861948   | KJ861794   |
| <i>Aneuretus simoni</i>             | CASEN0007014  | EF012961   | EF013669   | EF013089   | EF013541   | EF013382   | FJ939840   | KJ523645   | KJ523642   | XXXXXXXXXX | XXXXXXXXXX | XXXXXXXXXX |
| <i>Ankylofymeria coronacantha</i>   | CASEN00406734 | KJ860057   | KJ861945   | KJ861332   | KJ861516   | KJ859869   | KJ861142   | KJ861753   | KJ860482   | KJ861924   | KJ862001   | KJ861847   |
| <i>Anochetus madagascariensis</i>   | CASEN00498593 | EF012962   | EF013670   | EF013090   | EF013542   | EF013383   | XXXXXXXXXX | XXXXXXXXXX | XXXXXXXXXX | XXXXXXXXXX | XXXXXXXXXX | XXXXXXXXXX |
| <i>Anomalomyia boldogosi</i>        | CASEN0027032  | KJ861745   | KJ861755   | KJ861720   | KJ861735   | KJ861748   | KJ861761   | KJ861774   | KJ861787   | KJ861925   | KJ862002   | KJ861848   |
| <i>Apomyrma C102</i>                | CASEN0006673  | KJ861742   | KJ861755   | KJ861720   | KJ861735   | KJ861748   | KJ861761   | KJ861774   | KJ861787   | KJ861924   | KJ862001   | KJ861847   |
| <i>Apomyrma stygia</i>              | CASEN0007017  | EF012967   | EF013675   | EF013095   | EF013547   | EF013390   | KJ861608   | KJ861761   | KJ861774   | KJ861875   | KJ861952   | KJ861798   |
| <i>Aspinctopone silvestrii</i>      | CASEN00417123 | XXXXXXXXXX | XXXXXXXXXX | XXXXXXXXXX | XXXXXXXXXX | XXXXXXXXXX | XXXXXXXXXX | XXXXXXXXXX | XXXXXXXXXX | XXXXXXXXXX | XXXXXXXXXX | XXXXXXXXXX |
| <i>Belonopelta Hf01</i>             | CASEN00235904 | XXXXXXXXXX | XXXXXXXXXX | XXXXXXXXXX | XXXXXXXXXX | XXXXXXXXXX | XXXXXXXXXX | XXXXXXXXXX | XXXXXXXXXX | XXXXXXXXXX | XXXXXXXXXX | XXXXXXXXXX |
| <i>Boltonomyia wesmali</i>          | CASEN0006787  | XXXXXXXXXX | XXXXXXXXXX | XXXXXXXXXX | XXXXXXXXXX | XXXXXXXXXX | XXXXXXXXXX | XXXXXXXXXX | XXXXXXXXXX | XXXXXXXXXX | XXXXXXXXXX | XXXXXXXXXX |
| <i>Brachyoponera obscurans</i>      | CASEN00059658 | XXXXXXXXXX | XXXXXXXXXX | XXXXXXXXXX | XXXXXXXXXX | XXXXXXXXXX | XXXXXXXXXX | XXXXXXXXXX | XXXXXXXXXX | XXXXXXXXXX | XXXXXXXXXX | XXXXXXXXXX |
| <i>Camponotus maritimus</i>         | CASEN0106083  | AY867464   | AY867433   | AY867480   | AY867495   | EF013400   | KT443562   | KT443642   | KT443722   | XXXXXXXXXX | XXXXXXXXXX | XXXXXXXXXX |
| <i>Centromyrmex angulosus</i>       | CASEN00417147 | EF012979   | EF013687   | EF013107   | EF013559   | EF013403   | XXXXXXXXXX | XXXXXXXXXX | XXXXXXXXXX | XXXXXXXXXX | XXXXXXXXXX | XXXXXXXXXX |
| <i>Cetrapachys jacobsoni</i>        | CASEN0106233  | KJ523194   | KJ523194   | KJ523241   | KJ523271   | KJ523276   | KJ523310   | KJ523655   | KJ523752   | KJ861927   | KJ862004   | KJ861850   |
| <i>Chlorogaster kelleri</i>         | CASEN0098885  | KJ861949   | KJ861949   | KJ861949   | KJ861949   | KJ861949   | KJ861949   | KJ861949   | KJ861949   | KJ861949   | KJ861949   | KJ861949   |
| <i>Cryptopona glabra</i>            | CASEN0106309  | XXXXXXXXXX | XXXXXXXXXX | XXXXXXXXXX | XXXXXXXXXX | XXXXXXXXXX | XXXXXXXXXX | XXXXXXXXXX | XXXXXXXXXX | XXXXXXXXXX | XXXXXXXXXX | XXXXXXXXXX |
| <i>Cryptopona hartwegi</i>          | CASEN0027039  | XXXXXXXXXX | XXXXXXXXXX | XXXXXXXXXX | XXXXXXXXXX | XXXXXXXXXX | XXXXXXXXXX | XXXXXXXXXX | XXXXXXXXXX | XXXXXXXXXX | XXXXXXXXXX | XXXXXXXXXX |
| <i>Cryptomyrma longiscapus</i> cf.  | CASEN0052777  | KJ859911   | KJ861799   | KJ861187   | KJ861372   | KJ859924   | KJ860967   | KJ861569   | KJ860928   | XXXXXXXXXX | XXXXXXXXXX | XXXXXXXXXX |
| <i>Diacamma pallidum</i>            | CASEN0006639  | XXXXXXXXXX | XXXXXXXXXX | XXXXXXXXXX | XXXXXXXXXX | XXXXXXXXXX | XXXXXXXXXX | XXXXXXXXXX | XXXXXXXXXX | XXXXXXXXXX | XXXXXXXXXX | XXXXXXXXXX |
| <i>Discothyrea longipes</i>         | CASEN0004663  | XXXXXXXXXX | XXXXXXXXXX | XXXXXXXXXX | XXXXXXXXXX | XXXXXXXXXX | XXXXXXXXXX | XXXXXXXXXX | XXXXXXXXXX | XXXXXXXXXX | XXXXXXXXXX | XXXXXXXXXX |
| <i>Discothyrea MGO7</i>             | CASEN0042927  | EF012987   | EF013695   | EF013115   | EF013567   | EF013415   | XXXXXXXXXX | XXXXXXXXXX | XXXXXXXXXX | XXXXXXXXXX | XXXXXXXXXX | XXXXXXXXXX |
| <i>Discothyrea SC02</i>             | CASEN01059387 | XXXXXXXXXX | XXXXXXXXXX | XXXXXXXXXX | XXXXXXXXXX | XXXXXXXXXX | XXXXXXXXXX | XXXXXXXXXX | XXXXXXXXXX | XXXXXXXXXX | XXXXXXXXXX | XXXXXXXXXX |
| <i>Discothyrea SC05</i>             | CASEN01061605 | XXXXXXXXXX | XXXXXXXXXX | XXXXXXXXXX | XXXXXXXXXX | XXXXXXXXXX | XXXXXXXXXX | XXXXXXXXXX | XXXXXXXXXX | XXXXXXXXXX | XXXXXXXXXX | XXXXXXXXXX |
| <i>Discothyrea testacea</i>         | CASEN0007025  | EF012975   | EF013683   | EF013103   | EF013555   | EF013400   | KJ861608   | KJ861761   | KJ861774   | KJ861875   | KJ861952   | KJ861798   |
| <i>Dolichoderus pustulatus</i>      | CASEN0106164  | FJ939792   | FJ940028   | FJ939824   | FJ939995   | FJ939963   | FJ939859   | KJ523685   | KJ523602   | KJ861930   | KJ862007   | KJ861853   |
| <i>Ectomyrma eximiae</i> (euctenoi) | CASEN0106306  | XXXXXXXXXX | XXXXXXXXXX | XXXXXXXXXX | XXXXXXXXXX | XXXXXXXXXX | XXXXXXXXXX | XXXXXXXXXX | XXXXXXXXXX | XXXXXXXXXX | XXXXXXXXXX | XXXXXXXXXX |
| <i>Empoerona MY01</i>               | CASEN0202984  | XXXXXXXXXX | XXXXXXXXXX | XXXXXXXXXX | XXXXXXXXXX | XXXXXXXXXX | XXXXXXXXXX | XXXXXXXXXX | XXXXXXXXXX | XXXXXXXXXX | XXXXXXXXXX | XXXXXXXXXX |
| <i>Euponera brunni</i>              | CASEN0070749  | XXXXXXXXXX | XXXXXXXXXX | XXXXXXXXXX | XXXXXXXXXX | XXXXXXXXXX | XXXXXXXXXX | XXXXXXXXXX | XXXXXXXXXX | XXXXXXXXXX | XXXXXXXXXX | XXXXXXXXXX |
| <i>Euponera sokolovi</i>            | CASEN00487847 | EF013032   | EF013740   | EF013160   | EF013612   | EF013475   | XXXXXXXXXX | XXXXXXXXXX | XXXXXXXXXX | XXXXXXXXXX | XXXXXXXXXX | XXXXXXXXXX |
| <i>Euponera umbigua</i>             | CASEN00289205 | XXXXXXXXXX | XXXXXXXXXX | XXXXXXXXXX | XXXXXXXXXX | XXXXXXXXXX | XXXXXXXXXX | XXXXXXXXXX | XXXXXXXXXX | XXXXXXXXXX | XXXXXXXXXX | XXXXXXXXXX |
| <i>Harpagonyx saltator</i>          | CASEN0179535  | XXXXXXXXXX | XXXXXXXXXX | XXXXXXXXXX | XXXXXXXXXX | XXXXXXXXXX | XXXXXXXXXX | XXXXXXXXXX | XXXXXXXXXX | XXXXXXXXXX | XXXXXXXXXX | XXXXXXXXXX |
| <i>Hypomyrma opacior</i>            | CASEN0106125  | AY703822   | AY703822   | AY703822   | AY703822   | AY703822   | AY703822   | AY703822   | AY703822   | AY703822   | AY703822   | AY703822   |
| <i>Hypomyrma skakiava</i>           | CASEN00494141 | EF012997   | EF013705   | EF013125   | EF013577   | EF013429   | XXXXXXXXXX | XXXXXXXXXX | XXXXXXXXXX | XXXXXXXXXX | XXXXXXXXXX | XXXXXXXXXX |
| <i>Ladislus praedator</i>           | CASEN0106227  | KJ523222   | KJ523538   | KJ523589   | KJ523759   | KJ523814   | KJ523345   | KJ523691   | KJ523608   | XXXXXXXXXX | XXXXXXXXXX | XXXXXXXXXX |
| <i>Lasius californicus</i>          | CASEN0106045  | EF012998   | EF013706   | EF013126   | EF013578   | EF013430   | KJ523346   | KJ523692   | KJ523609   | KJ861932   | KJ862009   | KJ861855   |
| <i>Leptanilla GR01</i>              | CASEN0106236  | EF012999   | EF013707   | JN967846   | JN967889   | JN967829   | JN967880   | JN967820   | JN967809   | XXXXXXXXXX | XXXXXXXXXX | XXXXXXXXXX |
| <i>Leptanilla GR02</i>              | CASEN0106067  | JN967864   | JN967864   | JN967864   | JN967864   | JN967864   | JN967864   | JN967864   | JN967864   | XXXXXXXXXX | XXXXXXXXXX | XXXXXXXXXX |
| <i>Leptanilla TH01</i>              | CASEN0101792  | KJ861747   | KJ861760   | KJ861701   | KJ861749   | KJ861798   | KJ861660   | KJ861723   | KJ861786   | KJ861933   | KJ862010   | KJ861856   |
| <i>Leptanilla TH02</i>              | CASEN01019531 | XXXXXXXXXX | XXXXXXXXXX | XXXXXXXXXX | XXXXXXXXXX | XXXXXXXXXX | XXXXXXXXXX | XXXXXXXXXX | XXXXXXXXXX | XXXXXXXXXX | XXXXXXXXXX | XXXXXXXXXX |
| <i>Leptanilla TH03</i>              | CASEN01029721 | XXXXXXXXXX | XXXXXXXXXX | XXXXXXXXXX | XXXXXXXXXX | XXXXXXXXXX | XXXXXXXXXX | XXXXXXXXXX | XXXXXXXXXX | XXXXXXXXXX | XXXXXXXXXX | XXXXXXXXXX |
| <i>Leptanilla TH04</i>              | CASEN0098995  | XXXXXXXXXX | XXXXXXXXXX | XXXXXXXXXX | XXXXXXXXXX | XXXXXXXXXX | XXXXXXXXXX | XXXXXXXXXX | XXXXXXXXXX | XXXXXXXXXX | XXXXXXXXXX | XXXXXXXXXX |
| <i>Leptanilla TH05</i>              | CASEN01034656 | XXXXXXXXXX | XXXXXXXXXX | XXXXXXXXXX | XXXXXXXXXX | XXXXXXXXXX | XXXXXXXXXX | XXXXXXXXXX | XXXXXXXXXX | XXXXXXXXXX | XXXXXXXXXX | XXXXXXXXXX |
| <i>Leptanilla TH06</i>              | CASEN01029609 | XXXXXXXXXX | XXXXXXXXXX | XXXXXXXXXX | XXXXXXXXXX | XXXXXXXXXX | XXXXXXXXXX | XXXXXXXXXX | XXXXXXXXXX | XXXXXXXXXX | XXXXXXXXXX | XXXXXXXXXX |
| <i>Leptanilla TH08</i>              | CASEN00227555 | XXXXXXXXXX | XXXXXXXXXX | XXXXXXXXXX | XXXXXXXXXX | XXXXXXXXXX | XXXXXXXXXX | XXXXXXXXXX | XXXXXXXXXX | XXXXXXXXXX | XXXXXXXXXX | XXXXXXXXXX |
| <i>Leptanilla TH09</i>              | CASEN00227556 | XXXXXXXXXX | XXXXXXXXXX | XXXXXXXXXX | XXXXXXXXXX | XXXXXXXXXX | XXXXXXXXXX | XXXXXXXXXX | XXXXXXXXXX | XXXXXXXXXX | XXXXXXXXXX | XXXXXXXXXX |
| <i>Leptanilla ZAO1</i>              | CASEN01060685 | AY867452   | AY867452   | AY867468   | AY867468   | AY867468   | AY867468   | AY867468   | AY867468   | XXXXXXXXXX | XXXXXXXXXX | XXXXXXXXXX |
| <i>Leptanilloides femoralis</i>     | CASEN0106180  | KJ523223   | KJ523539   | KJ523570   | KJ523760   | KJ523815   | KJ523347   | KJ523693   | KJ523610   | XXXXXXXXXX | XXXXXXXXXX | XXXXXXXXXX |
| <i>Leptogonyx dimidiata</i>         | CASEN0106010  | EF013000   | EF013708   | EF013128   | EF013580   | EF013435   | XXXXXXXXXX | XXXXXXXXXX | XXXXXXXXXX | XXXXXXXXXX | XXXXXXXXXX | XXXXXXXXXX |
| <i>Lioponera occidentalis</i>       | CASEN0106078  | AY867465   | AY867434   | AY867481   | AY867496   | EF013441   | FJ939875   | XXXXXXXXXX | XXXXXXXXXX | XXXXXXXXXX | XXXXXXXXXX | XXXXXXXXXX |
| <i>Loboponera polita</i>            | CASEN0106119  | EF013113   | EF013721   | EF013141   | EF013593   | EF013445   | JN967811   | JN967823   | JN967812   | XXXXXXXXXX | XXXXXXXXXX | XXXXXXXXXX |
| <i>Mantis bradleyi</i>              | CASEN0106022  | EF013006   | EF013714   | EF013134   | EF013586   | EF013443   | FJ939877   | KJ523698   | KJ523615   | KJ861934   | KJ862011   | KJ861857   |
| <i>Mantis heureka</i>               | CASEN0106181  | KJ861748   | KJ861761   | KJ861702   | KJ861750   | KJ861799   | KJ861661   | KJ861724   | KJ861787   | KJ861935   | KJ862012   | KJ861858   |
| <i>Mesoponera ambigua</i>           | CASEN00447114 | XXXXXXXXXX | XXXXXXXXXX | XXXXXXXXXX | XXXXXXXXXX | XXXXXXXXXX | XXXXXXXXXX | XXXXXXXXXX | XXXXXXXXXX | XXXXXXXXXX | XXXXXXXXXX | XXXXXXXXXX |
| <i>Mesoponera melanogaster</i>      | CASEN01061571 | XXXXXXXXXX | XXXXXXXXXX | XXXXXXXXXX | XXXXXXXXXX | XXXXXXXXXX | XXXXXXXXXX | XXXXXXXXXX | XXXXXXXXXX | XXXXXXXXXX | XXXXXXXXXX | XXXXXXXXXX |
| <i>Myrmica termitaria</i>           | CASEN0106254  | XXXXXXXXXX | XXXXXXXXXX | XXXXXXXXXX | XXXXXXXXXX | XXXXXXXXXX | XXXXXXXXXX | XXXXXXXXXX | XXXXXXXXXX | XXXXXXXXXX | XXXXXXXXXX | XXXXXXXXXX |
| <i>Myrmoponera castaneae</i>        | CASEN0106147  | KJ861740   | KJ861753   | KJ861703   | KJ861751   | KJ861799   | KJ861611   | KJ861774   | KJ861787   | KJ861934   | KJ862011   | KJ861857   |
| <i>Myrmica pyrrhiformis</i>         | CASEN0106088  | AY035667   | AY036334   | AY037070   | AY037688   | AY038356   | FJ939878   | KJ523699   | KJ523616   | KJ861936   | KJ862013   | KJ861859   |
| <i>Myrmica melanica flavocincta</i> | CASEN0106049  | EF013017   | EF013725   | EF013145   | EF013597   | EF013457   | KJ861144   | KJ861755   | KJ860484   | XXXXXXXXXX | XXXXXXXXXX | XXXXXXXXXX |
| <i>Myrmica labronis</i>             | CASEN0106091  | AY035622   | AY036293   | AY036966   | AY037688   | AY038356   | XXXXXXXXXX | XXXXXXXXXX | XXXXXXXXXX | XXXXXXXXXX | XXXXXXXXXX | XXXXXXXXXX |
| <i>Myrmica carinata</i>             | CASEN0106282  | KJ859969   | KJ861857   | KJ861424   | KJ861429   | KJ859978   | KJ861034   | KJ861641   | XXXXXXXXXX | XXXXXXXXXX | XXXXXXXXXX | XXXXXXXXXX |
| <i>Myrmica nodulosa</i>             | CASEN0076622  | EF013022   | EF013730   | EF013150   | EF013602   | EF013463   | KJ861613   | KJ861766   | KJ861739   | KJ861880   | KJ861957   | KJ861803   |
| <i>Nesomyrmica undulata</i>         | CASEN0106307  | XXXXXXXXXX | XXXXXXXXXX | XXXXXXXXXX | XXXXXXXXXX | XXXXXXXXXX | XXXXXXXXXX | XXXXXXXXXX | XXXXXXXXXX | XXXXXXXXXX | XXXXXXXXXX | XXXXXXXXXX |
| <i>Nesomyrmica macrops</i>          | CASEN0106089  | AY703958   | AY703958   | AY703958   | AY703958   | AY703958   | AY703958   | AY703958   | AY703958   | AY703958   | AY703958   | AY703958   |
| <i>Odontomyrma coquereli</i>        | CASEN0049525  | EF013026   | EF013734   | EF013154   | EF013606   | EF013469   | KJ861662   | KJ861725   | KJ861788   | KJ861937   | KJ862014   | KJ861860   |
| <i>Odontomyrma transversa</i>       | CASEN00010127 | EF013027   | EF013735   | EF013155   | EF013607   | EF013470   | XXXXXXXXXX | XXXXXXXXXX | XXXXXXXXXX | XXXXXXXXXX | XXXXXXXXXX | XXXXXXXXXX |
| <i>Onychomyrma bedleyi</i>          | CASEN0106018  | EF013029   | EF013737   | EF013157   | EF013609   | EF013472   | KJ861715   | KJ861778   | KJ861791   | KJ861882   | KJ861959   | KJ861805   |
| <i>Opomyrma hungu-yungu</i>         | CASEN0178347  | KJ861747   | KJ861760   | KJ861701   | KJ861749   | KJ861798   | KJ861661   | KJ861724   | KJ861787   | KJ861935   | KJ862012   | KJ861858   |
| <i>Paraponera clavata</i>           | CASEN0106092  | AY035656   | AY036327   | AY037071   | AY037689   | AY038357   | KJ523699   | KJ523616   | KJ861937   | KJ862014   | KJ862011   | KJ861861   |
| <i>Paraponera darwini</i>           | CASEN0048490  | XXXXXXXXXX | XXXXXXXXXX | XXXXXXXXXX | XXXXXXXXXX | XXXXXXXXXX | XXXXXXXXXX | XXXXXXXXXX | XXXXXXXXXX | XXXXXXXXXX | XXXXXXXXXX | XXXXXXXXXX |
| <i>Phaenoponera MM01</i>            | CASEN0179537  | XXXXXXXXXX | XXXXXXXXXX | XXXXXXXXXX | XXXXXXXXXX | XXXXXXXXXX | XXXXXXXXXX | XXXXXXXXXX | XXXXXXXXXX | XXXXXXXXXX | XXXXXXXXXX | XXXXXXXXXX |
| <i>Pharytoponera pulchella</i>      | CASEN0027034  | XXXXXXXXXX | XXXXXXXXXX | XXXXXXXXXX | XXXXXXXXXX | XXXXXXXXXX | XXXXXXXXXX | XXXXXXXXXX | XXXXXXXXXX | XXXXXXXXXX | XXXXXXXXXX | XXXXXXXXXX |
| <i>Platylathra lamellosa</i>        | CASEN0106018  | XXXXXXXXXX | XXXXXXXXXX | XXXXXXXXXX | XXXXXXXXXX | XXXXXXXXXX | XXXXXXXXXX | XXXXXXXXXX | XXXXXXXXXX | XXXXXXXXXX | XXXXXXXXXX | XXXXXXXXXX |
| <i>Platylathra mocsarysi</i>        | CASEN0106094  | AY867453   | AY867422   | AY867469   | AY867484   | EF013484   | KJ861145   | KJ861756   | KJ860485   | KJ861939   | KJ862016   | KJ861862   |
| <i>Platylathra punctata</i>         | CASEN0006819  | EF013040   | EF013748   | EF013168   | EF013620   | EF013485   | XXXXXXXXXX | XXXXXXXXXX | XXXXXXXXXX | XXXXXXXXXX | XXXXXXXXXX | XXXXXXXXXX |
| <i>Plectroctena agnandis</i>        | CASEN0003063  | EF013041   | EF013749   | EF013169   | EF013621   | EF013486   | XXXXXXXXXX | XXXXXXXXXX | XXXXXXXXXX | XXXXXXXXXX | XXXXXXXXXX | XXXXXXXXXX |
| <i>Pogonomyrma versiculatum</i>     | CASEN0106213  | KJ859996   | KJ861884   | KJ861727   | KJ861456   | KJ859998   | KJ861676   | KJ860486   | XXXXXXXXXX | XXXXXXXXXX | XXXXXXXXXX | XXXXXXXXXX |
| <i>Ponera zweyeri</i>               | CASEN0047472  | XXXXXXXXXX | XXXXXXXXXX | XXXXXXXXXX | XXXXXXXXXX | XXXXXXXXXX | XXXXXXXXXX | XXXXXXXXXX | XXXXXXXXXX | XXXXXXXXXX | XXXXXXXXXX | XXXXXXXXXX |
| <i>Protomyrma amabilis</i>          | CASEN0025775  | KJ861749   | KJ861762   | KJ861703   | KJ861751   | KJ861799   | KJ861618   | KJ861781   | KJ861744   | KJ861885   | KJ861962   | KJ861808   |
| <i>Protomyrma bradleyi</i> cf.      | CASEN0106137  | XXXXXXXXXX | XXXXXXXXXX | XXXXXXXXXX | XXXXXXXXXX | XXXXXXXXXX | XXXXXXXXXX | XXXXXXXXXX | XXXXXXXXXX | XXXXXXXXXX | XXXXXXXXXX | XXXXXXXXXX |
| <i>Protomyrma mexi</i> tax.         | CASEN0041507  | EF013050   | EF013758   | EF013178   | EF013630   | EF013495   | XXXXXXXXXX | XXXXXXXXXX | XXXXXXXXXX | XXXXXXXXXX | XXXXXXXXXX | XXXXXXXXXX |
| <i>Protomyrma vivax</i>             | CASEN00059014 | XXXXXXXXXX | XXXXXXXXXX | XXXXXXXXXX | XXXXXXXXXX | XXXXXXXXXX | XXXXXXXXXX | XXXXXXXXXX | XXXXXXXXXX | XXXXXXXXXX | XXXXXXXXXX | XXXXXXXXXX |
| <i>Proteromyrma SC02</i>            | CASEN01059684 | XXXXXXXXXX | XXXXXXXXXX | XXXXXXXXXX | XXXXXXXXXX | XXXXXXXXXX | XXXXXXXXXX | XXXXXXXXXX | XXXXXXXXXX | XXXXXXXXXX | XXXXXXXXXX | XXXXXXXXXX |
| <i>Proteromyrma silaceum</i>        | CASEN00235164 | XXXXXXXXXX | XXXXXXXXXX | XXXXXXXXXX | XXXXXXXXXX | XXXXXXXXXX | XXXXXXXXXX | XXXXXXXXXX | XXXXXXXXXX | XXXXXXXXXX | XXXXXXXXXX | XXXXXXXXXX |
| <i>Proteromyrma sicutum</i>         | CASEN0106095  | AY035557   | AY036242   | AY036901   | AY037578   | EF013497   | KJ861146   | KJ861757   | KJ860486   | KJ861940   | KJ862017   | KJ861863   |
| <i>Protomyrma silvestrii</i>        | CASEN0107851  | XXXXXXXXXX | XXXXXXXXXX | XXXXXXXXXX | XXXXXXXXXX | XXXXXXXXXX | XXXXXXXXXX | XXXXXXXXXX | XXXXXXXXXX | XXXXXXXXXX | XXXXXXXXXX | XXXXXXXXXX |
| <i>Protomyrma P01</i>               | CASEN0007002  | EF013053   | EF013761   | EF013181   | EF013633   | EF013      |            |            |            |            |            |            |
